# Supplementary material for: Ionotropic Chemosensory Receptors Mediate the Taste and Smell of Polyamines
Source: PLoS Biol. 2016 May 4;14(5):e1002454. doi: 10.1371/journal.pbio.1002454 (PMC4856413; doi:10.1371/journal.pbio.1002454)
Supplement: S1 Data — (XLSX) [file pbio.1002454.s001.xlsx]

## Sheet: Figure 1 Data
Figure 1A
Number of eggs			Number of Flies (Progeny)
- polyamines	+Putrescine	+ Cadaverine	- polyamines	+Putrescine	+ Cadaverine
132	389	162	76	229	123
28	118	276	82	86	215
88	374	87	65	317	67
33	122	134	77	129	120
107	154	258	79	178	229
28	180	267	95	97	145
78	269	183	54	186	159
73	216	139	79	196	184
122	231	118	93	180	107
67	276	197	52	219	138
75.6	232.9	182.1	75.2	181.7	148.7
10	10	10	10	10	10
37.8688	95.5981	66.4471	14.4515	67.7283	49.6903
11.9752	30.2308	21.0124	4.56995	21.4176	15.7134
Figure 1B
Green Banana												1-2 days old banana												7 days old banana
peel	H20	total	PI	pulp	H20	total	PI	peel and pulp	H20	total	PI	peel	H20	total	PI	pulp	H20	total	PI	peel and pulp	H20	total	PI	peel	H20	total	PI	pulp	H20	total	PI	peel and pulp	H20	total	PI
Peel				Pulp				Peel and Pulp				Peel				Pulp				Peel and Pulp				Peel				Pulp				Peel and Pulp
5	42	47	-0.787234	3	44	47	-0.87234	3	37	40	-0.85	23	27	22.92	-0.08	30	23	53	0.132075	28	22	50	0.12	34	0	34	1	43	16	59	0.457627	32	12	44	0.454545
9	47	56	-0.678571	7	31	38	-0.631579	8	49	57	-0.719298	29	27	56	0.0357143	27	21	48	0.125	23	28	51	-0.0980392	33	9	42	0.571429	49	14	63	0.555556	46	8	54	0.703704
12	33	45	-0.466667	6	38	44	-0.727273	5	42	47	-0.787234	29	31	60	-0.0333333	34	37	71	-0.0422535	25	23	48	0.0416667	38	13	51	0.490196	37	8	45	0.644444	31	11	42	0.47619
4	38	42	-0.809524	9	42	51	-0.647059	7	43	50	-0.72	27	33	60	-0.1	26	32	58	-0.103448	21	24	45	-0.0666667	34	8	42	0.619048	32	13	45	0.422222	33	14	47	0.404255
7	41	48	-0.708333	6	38	44	-0.727273	2	51	53	-0.924528	25	31	56	-0.107143	26	28	54	-0.037037	27	20	47	0.148936	29	6	35	0.657143	42	12	54	0.555556	38	6	44	0.727273
5	43	48	-0.791667	4	39	43	-0.813953	12	37	49	-0.510204	21	29	50	-0.16	24	31	55	-0.127273	32	33	65	-0.0153846	29	9	38	0.526316	31	6	37	0.675676	37	11	48	0.541667
9	29	38	-0.526316	5	32	37	-0.72973	7	41	48	-0.708333	28	31	59	-0.0508475	32	26	58	0.103448	27	25	52	0.0384615	42	12	54	0.555556	22	9	31	0.419355	42	5	47	0.787234
6	39	45	-0.733333	9	38	47	-0.617021	4	39	43	-0.813953	34	26	60	0.133333	29	27	56	0.0357143	25	28	53	-0.0566038	36	6	42	0.714286	33	4	37	0.783784	35	8	43	0.627907
average PI			-0.687706	average PI			-0.720779	average PI			-0.754194	average PI			-0.0452845	average PI			0.0107783	average PI			0.0140463	average PI			0.641747	average PI			0.564277	average PI			0.590347
n			8	n			8	n			8	n			8	n			8	n			8	n			8	n			8	n			8
SD			0.127082	SD			0.0894218	SD			0.123564	SD			0.0924461	SD			0.102938	SD			0.0892155	SD			0.161699	SD			0.130782	SD			0.141546
SEM			0.0449303	SEM			0.0316154	SEM			0.0436865	SEM			0.0326846	SEM			0.0363941	SEM			0.0315424	SEM			0.0571691	SEM			0.0462385	SEM			0.0500441
Figure 1C
Spermine					Spermidine					Diaminopropane					Putrescine					Cadaverine					Diaminohexane					Diaminoheptane					Diaminooctane					Diaminodecane
Odors	male	female	total	PI	Odors	male	female	total	PI	Odors	male	female	total	PI	Odors	male	female	total	Pi	Odors	male	female	total	PI	Odors	male	female	total	PI	Odors	male	female	total	PI	Odors	male	female	total	PI	Odors	male	female	total	PI
Spermine	15	36	51	0.378378	Spermidine	18	25	43	0.34375	PRO	21	15	36	0.384615	PUT	17	23	40	0.6	CAD	21	16	37	0.321429	HEX	14	26	40	0.428571	HEPT	23	18	41	0.464286	OCT	22	24	46	0.642857	Lysine	13	21	34	0.283019
H2O	14	9	23		H2O	8	13	21		H2O	9	7	16		H2O	9	1	10		H2O	7	12	19		H2O	9	7	16		H2O	9	6	15		H2O	4	6	10		H2O	11	8	19
Spermine	16	26	42	0.68	Spermidine	19	27	46	0.333333	PRO	19	14	33	0.269231	PUT	18	13	31	0.47619	CAD	14	31	45	0.666667	HEX	21	36	57	0.652174	HEPT	22	24	46	0.4375	OCT	26	19	45	0.525424	Lysine	16	23	39	0.322034
H2O	3	5	8		H2O	14	9	23		H2O	12	7	19		H2O	7	4	11		H20	6	3	9		H2O	10	2	12		H2O	10	8	18		H2O	11	3	14		H2O	11	9	20
Spermine	14	13	27	0.421053	Spermidine	23	18	41	0.490909	PRO	23	25	48	0.548387	Put	20	19	39	0.444444	CAD	27	18	45	0.730769	HEX	15	19	34	0.446809	HEPT	30	21	51	0.619048	OCT	22	18	40	0.403509	Lysine	17	22	39	0.278689
H2O	3	8	11		H2O	11	3	14		H2O	6	8	14		H2O	6	9	15		H2O	4	3	7		H2O	9	4	13		H2O	4	8	12		H2O	8	9	17		H2O	12	10	22
Spermine	18	16	34	0.416667	Spermidine	17	12	29	0.45	PRO	14	19	33	0.375	Put	20	19	39	0.659574	CAD	22	14	36	0.531915	HEX	19	30	49	0.42029	HEPT	20	13	33	0.294118	OCT	21	25	46	0.352941	Lysine	18	26	44	0.419355
H2O	6	8	14		H2O	8	3	11		H2O	8	7	15		H2O	5	3	8		H2O	3	8	11		H2O	7	13	20		H2O	8	10	18		H2O	6	16	22		H2O	10	8	18
Spermine	19	17	36	0.285714	Spermidine	21	16	37	0.510204	PRO	14	17	31	0.319149	Put	27	9	36	0.636364	CAD	17	22	39	0.625	HEX	23	33	56	0.671642	HEPT	23	14	37	0.644444	OCT	17	25	42	0.4	Lysine	13	22	35	0.272727
H2O	6	14	20		H2O	7	5	12		H2O	4	12	16		H2O	5	3	8		H2O	2	7	9		H2O	3	8	11		H2O	5	3	8		H2O	7	11	18		H2O	7	13	20
Spermine	13	16	29	0.380952	Spermidine	17	16	33	0.571429	PRO	16	23	39	0.322034	Put	23	15	38	0.55102	CAD	18	19	37	0.541667	HEX	18	28	46	0.314286	HEPT	21	24	45	0.47541	OCT	29	15	44	0.62963	Lysine	22	19	41	0.389831
H2O	7	6	13		H2O	5	4	9		H2O	9	11	20		H2O	6	5	11		H2O	6	5	11		H2O	10	14	24		H2O	7	9	16		H2O	3	7	10		H2O	8	10	18
Spermine	14	20	34	0.416667	Spermidine	17	19	36	0.6	PRO	22	17	39	0.368421	Put	30	22	52	0.857143	CAD	28	13	41	0.413793	HEX	26	12	38	0.333333	HEPT	23	26	49	0.462687	OCT	19	22	41	0.490909	Lysine	26	19	45	0.2
H2O	5	9	14		H2O	8	1	9		H2O	11	7	18		H2O	3	1	4		H2O	4	13	17		H2O	14	5	19		H2O	8	10	18		H2O	10	4	14		H2O	17	13	30
Spermine	14	19	33	0.245283	Spermidine	13	21	34	0.511111	PRO	16	20	36	0.263158	Put	23	9	32	0.454545	CAD	19	17	36	0.469388	HEX	26	29	55	0.594203	HEPT	19	24	43	0.30303	OCT	17	23	40	0.355932	Lysine	16	26	42	0.555556
H2O	7	13	20		H2O	4	7	11		H2O	8	13	21		H2O	7	5	12		H2O	6	7	13		H2O	6	8	14		H2O	8	15	23		H2O	12	7	19		H2O	5	7	12
															Put	11	25	36	0.44	CAD	15	18	33	0.466667
															H2O	5	9	14		H2O	5	7	12
Sper average PI				0.403089	SperD average PI				0.476342	average PI				0.356249	Put	22	17	39	0.444444	CAD	27	11	38	0.617021	average PI				0.482663	average PI				0.462565	average PI				0.47515	Lys average PI				0.340151
n				8	n				8	n				8	H2O	9	6	15		H2O	6	3	9		n				8	n				8	n				8	n				8
SD				0.129367	SD				0.0968257	SD				0.0902431	Put	18	15	33	0.534884	CAD	31	8	39	0.56	SD				0.139202	SD				0.126598	SD				0.116308	SD				0.11129
SEM				0.0457382	SEM				0.0342331	SEM				0.0319057	H2O	8	2	10		H2O	8	3	11		SEM				0.0492153	SEM				0.0447591	SEM				0.0411212	SEM				0.039347
															Put	21	16	37	0.681818	CAD	28	11	39	0.625
															H2O	3	4	7		H2O	3	6	9
															Put	34	9	43	0.563636	CAD	28	9	37	0.608696
															H20	7	5	12		H2O	6	3	9
															Put	26	13	39	0.471698	CAD	23	14	37	0.321429
															H2O	8	6	14		H2O	6	13	19
															PUT average PI				0.565904	CAD average PI				0.508011
															n				8	n				8
															SD				0.140833	SD				0.153761
															SEM				0.0497921	SEM				0.0543626
Figure 1D
Odors	male	female	total	PI	Odors	male	female	total	PI	Odors	male	female	total	PI	Odors	male	female	total	PI	Odors	male	female	total	PI	Odors	male	female	total	PI	Odors	male	female	total	PI	Odors	male	female	total	PI	Odors	male	female	total	PI	Odors	male	female	total	PI
C.S										IR8a-/-										IR25a (line #36)										IR25a-(line #37)										IRIR76b-(line #24)
Putrescine					Cadaverine					Putrescine					Cadaverine					Putrescine					Cadaverine					Putrescine					Cadaverine					Putrescine					Cadaverine
Putrescine	13	23	36	0.846154	Cadaverine	12	13	25	0.666667	Putrescine	26	19	45	0.525424	Cadaverine	14	11	25	0.388889	Putrescine	24	26	50	0.470588	Cadaverine	29	13	42	0.527273	Putrescine	32	31	63	0.555556	Cadaverine	18	37	55	0.594203	Putrescine	20	14	34	0.416667	Cadaverine	27	18	45	0.428571
H2O	1	2	3		H2O	2	3	5		H2O	8	6	14		H2O	7	4	11		H2O	8	10	18		H2O	7	6	13		H2O	4	14	18		H2O	8	6	14		H2O	6	8	14		H2O	12	6	18
Putrescine	23	19	42	0.714286	Cadaverine	27	28	55	0.746032	Putrescine	28	17	45	0.636364	Cadaverine	27	29	56	0.723077	Putrescine	26	29	55	0.617647	Cadaverine	28	23	51	0.758621	Putrescine	23	13	36	0.469388	Cadaverine	25	19	44	0.6	Putrescine	19	21	40	0.454545	Cadaverine	27	18	45	0.607143
H20	1	6	7		H20	2	6	8		H20	2	8	10		H20	2	7	9		H20	5	8	13		H20	2	5	7		H20	6	7	13		H20	7	4	11		H20	9	6	15		H20	7	4	11
Putrescine	27	19	46	0.803922	Cadaverine	24	28	52	0.529412	Putrescine	23	26	49	0.580645	Cadaverine	18	29	47	0.709091	Putrescine	11	28	39	0.695652	Cadaverine	24	27	51	0.758621	Putrescine	26	17	43	0.72	Cadaverine	17	24	41	0.490909	Putrescine	19	14	33	0.32	Cadaverine	6	22	28	0.142857
H2O	3	2	5		H2O	4	12	16		H2O	5	8	13		H2O	2	6	8		H2O	2	5	7		H2O	2	5	7		H2O	5	2	7		H2O	6	8	14		H2O	15	2	17		H2O	7	14	21
Putrescine	26	21	47	0.807692	Cadaverine	18	37	55	0.617647	Putrescine	17	36	53	0.766667	Cadaverine	25	23	48	0.684211	Putrescine	19	28	47	0.566667	Cadaverine	29	26	55	0.641791	Putrescine	19	33	52	0.6	Cadaverine	26	12	38	0.617021	Putrescine	23	24	47	0.678571	Cadaverine	12	15	27	0.421053
H2O	2	3	5		H2O	7	6	13		H2O	2	5	7		H2O	3	6	9		H2O	8	5	13		H2O	6	6	12		H2O	8	5	13		H2O	2	7	9		H2O	3	6	9		H2O	6	5	11
Putrescine	32	18	50	0.754386	Cadaverine	19	29	48	0.745455	Putrescine	23	17	40	0.6	Cadaverine	18	24	42	0.615385	Putrescine	16	32	48	0.684211	Cadaverine	24	35	59	0.761194	Putrescine	18	26	44	0.517241	Cadaverine	32	16	48	0.6	Putrescine	13	18	31	0.291667	Cadaverine	25	14	39	0.471698
H2O	2	5	7		H2O	4	3	7		H2O	4	6	10		H2O	6	4	10		H2O	2	7	9		H2O	3	5	8		H2O	9	5	14		H2O	8	4	12		H2O	12	5	17		H2O	8	6	14
Putrescine	29	21	50	0.754386	Cadaverine	29	17	46	0.803922	Putrescine	17	26	43	0.535714	Cadaverine	14	26	40	0.428571	Putrescine	8	35	43	0.686275	Cadaverine	35	28	63	0.726027	Putrescine	29	26	55	0.617647	Cadaverine	19	24	43	0.592593	Putrescine	29	18	47	0.492063	Cadaverine	26	23	49	0.462687
H2O	1	6	7		H2O	3	2	5		H2O	4	9	13		H2O	12	4	16		H2O	6	2	8		H2O	7	3	10		H2O	8	5	13		H2O	4	7	11		H2O	6	10	16		H2O	5	13	18
Putrescine	34	26	60	0.5	Cadaverine	32	18	50	0.428571	Putrescine	15	32	47	0.678571	Cadaverine	25	20	45	0.698113	Putrescine	29	26	55	0.571429	Cadaverine	33	18	51	0.645161	Putrescine	26	24	50	0.694915	Cadaverine	15	18	33	0.534884	Putrescine	17	6	23	0.277778	Cadaverine	25	19	44	0.54386
H2O	11	9	20		H2O	7	13	20		H2O	3	6	9		H2O	3	5	8		H2O	6	9	15		H2O	2	9	11		H2O	6	3	9		H2O	8	2	10		H2O	8	5	13		H2O	9	4	13
Putrescine	27	12	39	0.902439	Cadaverine	36	15	51	0.39726	Putrescine	17	42	59	0.787879	Cadaverine	17	32	49	0.633333	Putrescine	34	16	50	0.724138	Cadaverine	27	15	42	0.68	Putrescine	25	16	41	0.64	Cadaverine	26	13	39	0.529412	Putrescine	11	19	30	0.428571	Cadaverine	17	16	33	0.32
H2O	1	1	2		H2O	9	13	22		H2O	2	5	7		H2O	8	3	11		H2O	5	3	8		H2O	6	2	8		H2O	4	5	9		H2O	7	5	12		H2O	4	8	12		H2O	9	8	17
average PI:				0.760408	average PI:				0.616871	average PI:				0.638908	average PI:				0.610084	average PI:				0.627076	average PI:				0.687336	average PI:				0.601843	average PI:				0.569878	average PI:				0.419983	average PI:				0.424734
SD				0.120515	SD				0.152137	SD				0.0989446	SD				0.129976	SD				0.0863678	SD				0.0816282	SD				0.0855044	SD				0.0451078	SD				0.130945	SD				0.142208
n				8	n				8	n				8	n				8	n				8	n				8	n				8	n				8	n				8	n				8
SEM				0.0426084	SEM				0.0537885	SEM				0.0349822	SEM				0.0459535	SEM				0.0305356	SEM				0.0288599	SEM				0.0302304	SEM				0.015948	SEM				0.0462962	SEM				0.0502782
Figure 1E
Odors	male	female	total	PI	Odors	male	female	total	PI	Odors	male	female	total	PI	Odors	male	female	total	PI	Odors	male	female	total	PI	Odors	male	female	total	PI	Odors	male	female	total	PI	Date	Odors	male	female	total	PI	Odors	male	female	total	Pi	Date	Odors	male	female
C.S										w1118										IR41a-Gal4										UAS-Kir2.1											IR41a > Kir2.1
PUT					CAD					PUT					CAD					Put.					Cad.					PUT						CAD					Putrescine						Cadaverine
Put	19	23	42	0.448276	Cad	23	29	52	0.733333	Put	18	28	46	0.642857	Ornithine	19	24	43	0.457627	Put	24	23	47	0.424242	Spermidine	12	29	41	0.576923	Put	17	22	39	0.392857	13-11-2013	Ornithine	16	41	57	0.676471	Put	12	17	29	-0.147059	13-11-2013	CAD	13	15
H2O	10	6	16		H2O	2	6	8		H2O	7	3	10		H2O	4	12	16		H2O	12	7	19		H2O	4	7	11		H2O	8	9	17			H2O	6	5	11		H2O	16	23	39			H2O	8	24
Put	22	22	44	0.6	Cad	19	23	42	0.377049	Put	13	26	39	0.278689	Ornithine	28	23	51	0.43662	Put	29	11	40	0.568627	Spermidine	23	31	54	0.714286	Put	19	26	45	0.47541		Ornithine	29	31	60	0.791045	Put	12	14	26	-0.133333		CAD	7	14
H2O	7	4	11		H2O	5	14	19		H2O	5	17	22		H2O	11	9	20		H2O	8	3	11		H2O	1	8	9		H2O	8	8	16			H2O	4	3	7		H2O	13	21	34			H20	18	10
Put	18	31	49	0.53125	Cad	12	33	45	0.764706	Put	18	31	49	0.53125	Ornithine	27	19	46	0.703704	Put	32	19	51	0.416667	Spermidine	21	21	42	0.292308	Put	22	25	47	0.287671	15-11-2013	Ornithine	26	23	49	0.849057	Put	12	16	28	-0.125	15-11-2013	CAD	11	14
H2O	6	9	15		H2O	4	2	6		H2O	3	12	15		H2O	1	7	8		H2O	9	12	21		H2O	19	4	23		H2O	14	12	26			H2O	3	1	4		H2O	20	16	36			H2O	8	22
Put	28	32	60	0.5	Cad	17	41	58	0.611111	Put	12	36	48	0.52381	Ornithine	23	28	51	0.758621	Put	34	25	59	0.787879	Spermidine	17	31	48	0.745455	Put	33	18	51	0.672131		Ornithine	34	27	61	0.435294	Put	10	15	25	-0.166667		CAD	13	9
H2O	9	11	20		H2O	2	12	14		H2O	14	1	15		H2O	5	2	7		H2O	2	5	7		H2O	4	3	7		H2O	8	2	10			H2O	12	12	24		H2O	19	16	35			H2O	12	18
Put	15	48	63	0.852941	Cad	15	25	40	0.509434	Put	11	25	36	0.469388	Ornithine	29	33	62	0.425287	Put	24	33	57	0.561644	Spermidine	6	38	44	0.157895	Put	29	31	60	0.538462	19-11-2013	Ornithine	21	10	31	0.55	Put	12	11	23	-0.342857	19-11-2013	CAD	13	12
H2O	4	1	5		H2O	7	6	13		H2O	3	10	13		H2O	14	11	25		H2O	12	4	16		H2O	28	4	32		H2O	12	6	18			H2O	2	7	9		H2O	29	18	47			H2O	14	16
Put	6	13	19	0.310345	Cad	33	21	54	0.35	Put	21	19	40	0.290323	Ornithine	44	29	73	0.536842	Put	29	34	63	0.657895	Spermidine	35	31	66	0.885714	Put	31	34	65	0.780822		Ornithine	45	17	62	0.771429	Put	13	12	25	-0.152542		CAD	14	16
H2O	8	2	10		H2O	14	12	26		H2O	18	4	22		H2O	12	10	22		H2O	4	9	13		H2O	1	3	4		H2O	7	1	8			H2O	4	4	8		H2O	16	18	34			H2O	13	21
Put	21	29	50	0.785714	Cad	19	24	43	0.264706	Put	25	28	53	0.472222	Ornithine	17	24	41	0.15493	Put	42	6	48	0.655172	Spermidine	34	36	70	0.794872	Put	34	35	69	0.604651	21-11-2013	Ornithine	16	29	45	0.47541	Put	12	14	26	-0.341772	21-11-2013	CAD	13	12
H2O	5	1	6		H2O	11	14	25		H2O	6	13	19		H2O	23	7	30		H2O	7	3	10		H2O	2	6	8		H2O	9	8	17			H2O	12	4	16		H2O	22	31	53			H2O	11	26
Put	24	12	36	0.565217	Cad	25	42	67	0.717949	Put	29	28	57	0.83871	Ornithine	24	28	52	0.677419	Put	6	45	51	0.342105	Spermidine	16	29	45	0.636364	Put	23	29	52	0.424658		Ornithine	14	24	38	0.52	Put	15	12	27	-0.114754		CAD	16	12
H2O	8	2	10		H2O	6	5	11		H2O	3	2	5		H2O	1	9	10		H2O	18	7	25		H2O	7	3	10		H2O	15	6	21			H2O	9	3	12		H2O	18	16	34			H2O	12	25
																																									Put	13	11	24	-0.172414	2014-04-02	CAD	13	22
																																									H2O	21	13	34			H2O	13	19
average PI				0.574218	average PI				0.541036	average PI				0.505906	average PI				0.518881	average PI				0.551779	average PI				0.600477	average PI				0.522083		average PI				0.633588	Put	21	16	37	0.0724638		CAD	15	11
n				8	n				8	n				8	n				8	n				8	n				8	n				8		n				8	H2O	19	13	32			H2O	17	19
SD				0.175665	SD				0.194186	SD				0.181678	SD				0.19597	SD				0.149551	SD				0.252363	SD				0.160296		SD				0.158695	Put	13	22	35	0.129032	2014-07-02	CAD	18	17
SEM				0.0621071	SEM				0.0686553	SEM				0.064233	SEM				0.069286	SEM				0.0528744	SEM				0.0892239	SEM				0.0566733		SEM				0.0561071	H2O	16	11	27			H2O	13	34
																																									Put	15	22	37	0.0571429		CAD	19	12
																																									H2O	19	14	33			H2O	11	34
																																									average PI				-0.201319		average PI
																																									n				8		n
																																									SD				0.0972376		SD
																																									SEM				0.0343787		SEM
Figure 1G
IR41a > IR76b1/+				IR76b-Gal4; IR76b1/+				UAS-IR76b; IR76b1/+				IR41a > IR76b; IR76b1/1				IR76b1/1				IR76b > IR76b; IR76b1/1
Put	H20	total	P.I	Put	H20	total	P.I	Put	H20	total	P.I	Put	H20	total	P.I	Put	H20	total	P.I	Put	H20	total	P.I
37	4	41	0.804878	42	6	48	0.75	37	9	46	0.608696	33	0	33	1	33	12	45	0.466667	45	8	53	0.698113
39	7	46	0.695652	37	4	41	0.804878	43	6	49	0.755102	32	0	32	1	41	18	59	0.389831	36	3	39	0.846154
43	11	54	0.592593	51	7	58	0.758621	42	9	51	0.647059	47	10	57	0.649123	32	16	48	0.333333	47	14	61	0.540984
45	9	54	0.666667	45	6	51	0.764706	51	8	59	0.728814	32	3	35	0.828571	40	19	59	0.355932	43	12	55	0.563636
50	10	60	0.666667	45	6	51	0.764706	53	9	62	0.709677	29	6	35	0.657143	30	14	44	0.363636	42	9	51	0.647059
42	12	54	0.555556	43	7	50	0.72	50	7	57	0.754386	36	2	38	0.894737	29	11	40	0.45	47	11	58	0.62069
51	6	57	0.789474	50	9	59	0.694915	43	12	55	0.563636	53	12	65	0.630769	32	27	59	0.0847458	43	10	53	0.622642
39	14	53	0.471698	45	16	61	0.47541	45	9	54	0.666667	49	15	64	0.53125	26	20	46	0.130435	47	7	54	0.740741
												50	9	59	0.694915	23	16	39	0.179487	45	12	57	0.578947
												45	7	52	0.730769	29	20	49	0.183673	40	14	54	0.481481
Average P:I			0.655398				0.716654				0.679255				0.761728				0.293774				0.634045
n			8				8				8				10				10				10
S.D			0.113297				0.102788				0.0700208				0.161595				0.13719				0.105875
SEM			0.0400566				0.0363409				0.0247561				0.0511009				0.0433834				0.0334806
Figure 1H
IR76b-GAL4								IR41ai								IR76b > IR41a-i (a)								IR76b > IR41a-i (b)
Putrescine				Cadaverine				Putrescine				Cadaverine				Putrescine				Cadaverine				Putrescine				Cadaverine
Putrescine	H2O	total	PI	Putrescine	H2O	total	PI	Putrescine	H2O	total	PI	Putrescine	H2O	total	PI	Putrescine	H2O	total	PI	Putrescine	H2O	total	PI	Putrescine	H2O	total	PI	Putrescine	H2O	total	PI
39	21	60	0.3	42	20	62	0.354839	47	15	62	0.516129	37	21	58	0.275862	45	36	81	0.111111	39	27	66	0.181818	24	22	46	0.0434783	27	21	48	0.125
36	20	56	0.285714	37	22	59	0.254237	50	19	69	0.449275	41	16	57	0.438596	34	22	56	0.214286	37	23	60	0.233333	38	26	64	0.1875	31	18	49	0.265306
35	20	55	0.272727	43	15	58	0.482759	45	33	78	0.153846	35	17	52	0.346154	37	22	59	0.254237	30	19	49	0.22449	16	19	35	-0.0857143	26	22	48	0.0833333
42	22	64	0.3125	40	19	59	0.355932	49	21	70	0.4	30	14	44	0.363636	39	26	65	0.2	32	27	59	0.0847458	21	17	38	0.105263	33	25	58	0.137931
45	6	51	0.764706	43	9	52	0.653846	52	10	62	0.677419	50	4	54	0.851852	37	24	61	0.213115	30	19	49	0.22449	22	27	49	-0.102041	26	23	49	0.0612245
43	9	52	0.653846	51	7	58	0.758621	47	12	59	0.59322	45	9	54	0.666667	29	20	49	0.183673	27	18	45	0.2	34	19	53	0.283019	35	29	64	0.09375
37	7	44	0.681818	39	8	47	0.659574	43	9	52	0.653846	37	7	44	0.681818	33	21	54	0.222222	29	19	48	0.208333	33	21	54	0.222222	29	24	53	0.0943396
49	10	59	0.661017	42	10	52	0.615385	39	14	53	0.471698	50	6	56	0.785714	30	26	56	0.0714286	37	23	60	0.233333	29	26	55	0.0545455	27	23	50	0.08
39	12	51	0.529412	47	19	66	0.424242	36	6	42	0.714286	38	8	46	0.652174
43	7	50	0.72	45	11	56	0.607143	49	7	56	0.75	34	12	46	0.478261	average PI			0.183759				0.198818				0.0885341				0.117611
36	15	51	0.411765	39	7	46	0.695652	32	11	43	0.488372	46	14	60	0.533333	n			8				8				8				8
43	8	51	0.686275	32	10	42	0.52381	46	9	55	0.672727	49	8	57	0.719298	SD			0.0614118				0.0494168				0.139201				0.0645437
33	16	49	0.346939	37	12	49	0.510204	39	5	44	0.772727	37	12	49	0.510204	SEM			0.0217124				0.0174715				0.0492148				0.0228196
37	3	40	0.85	44	5	49	0.795918	36	9	45	0.6	41	9	50	0.64
41	4	45	0.822222	37	9	46	0.608696	36	6	42	0.714286	51	6	57	0.789474
39	8	47	0.659574	40	14	54	0.481481	47	9	56	0.678571	39	10	49	0.591837
			0.559907				0.548896				0.58165				0.582805
			16				16				16				16
			0.20575				0.152643				0.161493				0.170802
			0.0514375				0.0381606				0.0403732				0.0427004
[truncated: 30 more columns]

## Sheet: Figure 2 Data
PANEL B-D							PANEL I-K
	PUTRESCINE STIMULATION							Ir76b MUTANT PUTRESCINE STIMULATION
	Genotype: Ir41a;UAS-GCamp6f, females							Genotype: IR76b-Gal4,UAS-GCaMP6f ; IR76b1
	Peak Max (0 ppm)	Peak Max (6 ppm)	Peak Max (8 ppm)	Peak Max (10 ppm)				Peak Max (0 ppm)	Peak Max (10 ppm)		0 ppm box plot values	10 ppm box plot values
fly-1	1.90777	22.0352	20.6935	29.3228			fly-1	3.00324	2.77355		1.00325	1.34195	median
fly-2	3.036	24.1248	33.8033	24.5909			fly-2	1.66809	0.75593		0.41252	0.75593	min
fly-3	3.41947	32.4007	48.5822	38.1003			fly-3	0.699537	1.4063		0.683976	0.935252	Q1
fly-4	3.63553	19.852	27.2293	26.4419			fly-4	0.678789	1.2776		1.00325	1.34195	Q2
fly-5	3.12348	16.7886	16.4944	18.4242			fly-5	1.30697	0.821135		1.57781	1.6811	Q3
fly-6	1.6182	19.9124	16.0721	19.7652			fly-6	0.41252	1.7727		3.00324	2.77355	max
fly-7	1.27122	6.92393	9.67951	11.0704							0.271456	0.179322	error min
fly-8	2.40857	26.7605	30.2081	43.574							1.42543	1.09245	error max
fly-9	2.26009	17.0749	17.0749	22.5018			AVG	1.29486	1.46787		0.683976	0.935252	Box1
											0.319277	0.406702	Box2
AVG	2.52004	20.6526	24.4264	25.9768			STD	0.956084	0.743349		0.574558	0.339145	Box3
							N	6	6
STD	0.830015	7.12994	11.8895	9.99922			SEM	0.39032	0.303471
N	9	9	9	9
SEM	0.276672	2.37665	3.96315	3.33307
PANEL F-H
								Ir76b HETEROZYGOUS CONTROL PUTRESCINE STIMULATION
	PUTRESCINE STIMULATION
								Genotype: IR76b-Gal4,UAS-GCaMP6f ; IR76b1/+
	Genotype: Ir76b-Gal4;UAS-GCamp6f, females
								Peak Max (0 ppm)	Peak Max (10 ppm)		0 ppm box plot values	10 ppm box plot values
	Peak Max (0 ppm)	Peak Max (6 ppm)	Peak Max (8 ppm)	Peak Max (10 ppm)			fly-1	6.08764	90.6209		6.32881	53.2607	median
fly-1	5.89274	13.5665	25.4841	25.1333			fly-2	7.76522	54.6061		3.92353	34.2286	min
fly-2	2.87606	15.9225	38.7137	34.8834			fly-3	5.61922	51.6202		5.73632	51.7173	Q1
fly-3	4.62133	14.0299	27.3243	26.985			fly-4	6.56997	54.5125		6.32881	53.2607	Q2
fly-4	2.81059	18.6677	24.4882	30.5864			fly-5	7.20038	52.0088		7.04278	54.5827	Q3
fly-5	0.249061	21.163	33.6558	32.4126			fly-6	3.92353	34.2286		7.76522	90.6209	max
fly-6	4.04795	31.7758	46.5496	44.511							1.81279	17.4887	error min
											0.72244	36.0382	error max
AVG	3.41629	19.1876	32.7026	32.4186			AVG	6.19433	56.2662		5.73632	51.7173	Box1
											0.592483	1.54334	Box2
STD	1.93256	6.80432	8.68667	6.90303			STD	1.35052	18.501		0.713972	1.32202	Box3
N	6	6	6	6			N	6	6
SEM	0.788965	2.77785	3.54632	2.81815			SEM	0.551349	7.55301

## Sheet: Figure 3 Data
Figure 3B
agarose	agarose	total	PI	Spermine	Agarose	total	PI	Spermidine	Agarose	total	PI	Diaminopropane	Agarose	total	PI	Putrescine	Agarose	total	PI	Cadaerine	Agarose	total	PI	Diaminhexane	Agarose	total	PI	Diaminoheptane	Agarose	total	PI	Diaminooctane	Agarose	total	PI	Diaminodecane	Agarose	total	PI	Put	Cad	total
74	58	132	0.121212	17	87	104	-0.673077	24	197	221	-0.782805	23	103	126	-0.634921	16	86	102	-0.686275	13	88	101	-0.742574	8	176	184	-0.913043	27	167	194	-0.721649	27	153	180	-0.7	29	117	146	-0.60274	63	52	115	0.0956522
47	52	99	-0.0505051	18	117	135	-0.733333	8	87	95	-0.831579	12	125	137	-0.824818	18	91	109	-0.669725	10	124	134	-0.850746	19	168	187	-0.796791	12	125	137	-0.824818	37	156	193	-0.61658	31	138	169	-0.633136	41	63	104	-0.211538
55	44	99	0.111111	8	126	134	-0.880597	14	105	119	-0.764706	8	83	91	-0.824176	12	56	68	-0.647059	23	143	166	-0.722892	27	165	192	-0.71875	24	85	109	-0.559633	29	163	192	-0.697917	14	92	106	-0.735849	37	29	66	0.121212
39	46	85	-0.0823529	16	83	99	-0.676768	8	92	100	-0.84	17	108	125	-0.728	24	76	100	-0.52	13	76	89	-0.707865	16	152	168	-0.809524	18	119	137	-0.737226	18	142	160	-0.775	7	153	160	-0.9125	72	59	131	0.0992366
81	106	187	-0.13369	3	86	89	-0.932584	14	73	87	-0.678161	6	164	170	-0.929412	17	96	113	-0.699115	19	74	93	-0.591398	24	123	147	-0.673469	22	167	189	-0.767196	14	106	120	-0.766667	16	114	130	-0.753846	58	47	105	0.104762
80	82	162	-0.0123457	19	97	116	-0.672414	19	114	133	-0.714286	25	126	151	-0.668874	23	75	98	-0.530612	17	121	138	-0.753623	17	153	170	-0.8	19	162	181	-0.790055	17	146	163	-0.791411	26	86	112	-0.535714	72	54	126	0.142857
78	70	148	0.0540541	6	152	158	-0.924051	15	127	142	-0.788732	41	147	188	-0.56383	7	136	143	-0.902098	24	78	102	-0.529412	21	78	99	-0.575758	24	119	143	-0.664336	19	96	115	-0.669565	5	163	168	-0.940476	75	61	136	0.102941
116	97	213	0.0892019	46	164	210	-0.561905	14	93	107	-0.738318	9	136	145	-0.875862	27	98	125	-0.568	13	85	98	-0.734694	19	85	104	-0.634615	37	96	133	-0.443609	16	162	178	-0.820225	18	132	150	-0.76	96	84	180	0.0666667
71.25	69.375		0.0120857	16.625	114		-0.756841	14.5	111		-0.767323	17.625	124		-0.756236	18	89.25		-0.65286	16.5	98.625		-0.70415	18.875	137.5		-0.740244	22.875	130		-0.688565	22.125	140.5		-0.729671	18.25	124.375		-0.734283	64.25	56.125		0.0652237
24.259	23.5611		0.0956978	13.3303	31.305		0.13798	5.2915	38.5487		0.0557031	11.7344	25.7904		0.127496	6.59004	23.3162		0.122761	5.12696	26.6079		0.0999707	5.69304	38.0338		0.10991	7.33753	32.0936		0.128577	8.00781	25.5455		0.0694119	9.7358	27.3545		0.142572	19.1517	15.5695		0.113911
8	8		8	8	8		8	8	8		8	8	8		8	8	8		8	8	8		8	8	8		8	8	8		8	8	8		8	8	8		8	8	8		8
8.57686	8.3301		0.0338343	4.71297	11.068		0.0487833	1.87083	13.629		0.019694	4.14874	9.11827		0.0450766	2.32993	8.2435		0.0434024	1.81265	9.40733		0.035345	2.01279	13.447		0.0388591	2.59421	11.3468		0.0454588	2.83119	9.03169		0.0245408	3.44212	9.67127		0.0504068	6.77113	5.50467		0.0402735
Figure 3C
Putrescine	Agarose	total	PI	cadaverine	Agarose	total	PI
0	5	5	-1	1	5	6	-0.666667
1	6	7	-0.714286	4	5	9	-0.111111
2	15	17	-0.764706	2	6	8	-0.5
0	13	13	-1	2	9	11	-0.636364
1	12	13	-0.846154	0	8	8	-1
3	9	12	-0.5	2	7	9	-0.555556
2	1	3	0.333333	1	6	7	-0.714286
3	9	12	-0.5	0	3	3	-1
0	3	3	-1	1	11	12	-0.833333
0	5	5	-1	3	7	10	-0.4
2	16	18	-0.777778	8	9	17	-0.0588235
3	9	12	-0.5	0	13	13	-1
2	7	9	-0.555556	2	15	17	-0.764706
0	19	19	-1	4	8	12	-0.333333
4	14	18	-0.555556	3	4	7	-0.142857
0	12	12	-1	5	5	10	0
1	12	13	-0.846154	3	7	10	-0.4
5	4	9	0.111111	1	12	13	-0.846154
3	17	20	-0.7	0	10	10	-1
2	10	12	-0.666667	2	6	8	-0.5
2	6	8	-0.5	1	15	16	-0.875
0	8	8	-1	1	12	13	-0.846154
1	10	11	-0.818182	0	17	17	-1
3	3	6	0	2	6	8	-0.5
2	5	7	-0.428571	0	10	10	-1
5	12	17	-0.411765	3	8	11	-0.454545
3	3	6	0	1	3	4	-0.5
2	7	9	-0.555556	0	13	13	-1
5	5	10	0	1	6	7	-0.714286
1	3	4	-0.5	0	9	9	-1
1.93333	8.66667		-0.589883	1.76667	8.5		-0.645106
30	30		30	30	30		30
1.55216	4.72946		0.369038	1.81342	3.66484		0.313178
0.283384	0.863478		0.0673769	0.331084	0.669105		0.0571783
Figure 3D
PUT	APPLE	total	PI	CAD	APPLE	total	PI	PUT+APPLE	APPLE	total	PI	CAD+APPLE	APPLE	total	PI	Agarose CONTROL
number of eggs				number of eggs				number of eggs				number of eggs				left half	right half	total
54	268	322	-0.664596	36	281	317	-0.772871	276	35	311	0.77492	287	43	330	0.739394	143	119	262	0.0916031
45	251	296	-0.695946	38	266	304	-0.75	291	51	342	0.701754	319	47	366	0.743169	165	142	307	0.0749186
54	287	341	-0.683284	54	298	352	-0.693182	301	38	339	0.775811	261	28	289	0.806228	124	154	278	-0.107914
63	312	375	-0.664	53	287	340	-0.688235	297	23	320	0.85625	266	38	304	0.75	173	148	321	0.0778816
33	290	323	-0.795666	45	287	332	-0.728916	314	37	351	0.789174	264	37	301	0.754153	165	132	297	0.111111
37	295	332	-0.777108	32	290	322	-0.801242	328	42	370	0.772973	271	42	313	0.731629	176	181	357	-0.0140056
32	298	330	-0.806061	41	267	308	-0.733766	298	53	351	0.698006	295	37	332	0.777108	113	126	239	-0.0543933
26	301.9	327.9	-0.841415	58	311	369	-0.685637	276	34	310	0.780645	327	48	375	0.744	153	186	339	-0.0973451
41	305	346	-0.763006	61	301	362	-0.662983	325	38	363	0.790634	265	54	319	0.661442	142	134	276	0.0289855
44	308	352	-0.75	42	275	317	-0.735016	284	29	313	0.814696	294	39	333	0.765766	162	141	303	0.0693069
29	267	296	-0.804054	48	276	324	-0.703704	201	41	242	0.661157	264	29	293	0.802048	173	162	335	0.0328358
64	315	379	-0.662269	65	324	389	-0.66581	327	39	366	0.786885	285	61	346	0.647399	166	149	315	0.0539683
37	319	356	-0.792135	51	265	316	-0.677215	318	45	363	0.752066	281	31	312	0.801282	142	123	265	0.0716981
49	321	370	-0.735135	42	298	340	-0.752941	237	38	275	0.723636	273	34	307	0.778502	170	161	331	0.0271903
45	325	370	-0.756757	58	318	376	-0.691489	285	26	311	0.832797	314	47	361	0.739612	152	181	333	-0.0870871
47	328	375	-0.749333	63	315	378	-0.666667	271	42	313	0.731629	276	48	324	0.703704	148	173	321	-0.0778816
14.5833	99.8104		-0.746298	16.3958	97.0625		-0.713105	96.4375	12.7292		0.76519	94.625	13.8125		0.74659	51.3958	50.25		0.0125546
3.76829	7.44333		0.0571508	3.39982	6.37265		0.0416048	11.2775	2.66727		0.051575	6.98239	3.04039		0.045666	6.05067	7.20853		0.0745357
16	16		16	16	16		16	16	16		16	16	16		16	16	16		16
0.942072	1.86083		0.0142877	0.849956	1.59316		0.0104012	2.81936	0.666819		0.0128937	1.7456	0.760098		0.0114165	1.51267	1.80213		0.0186339
Figure 3E
CS (control)								Antenna -								wings (-)								Front 2 legs surgically removed								Middle 2 legs surgically removed								Hind 2 legs surgically removed								labellum surgically removed
Putrescine	Agarose	total	PI	Cadaverine	Agarose	total	PI	Putrescine	Agarose	total	PI	Cadaverine	Agarose	total	PI	Putrescine	Agarose	total	PI	Cadaverine	Agarose	total	PI	Putrescine	Agarose	total	PI	Cadaverine	Agarose	total	PI	Putrescine	Agarose	total	PI	Cadaverine	Agarose	total	PI	Putrescine	Agarose	total	PI	Cadaverine	Agarose	total	PI	Putrescine	Agarose
12	62	74	-0.675676	8	78	86	-0.813953	16	86	102	-0.686275	31	143	174	-0.643678	12	76	88	-0.727273	7	82	89	-0.842697	17	69	86	-0.604651	12	65	77	-0.688312	6	87	93	-0.870968	14	87	101	-0.722772	20	51	71	-0.43662	20	72	92	-0.565217	34	57
10	57	67	-0.701493	5	64	69	-0.855072	18	91	109	-0.669725	28	82	110	-0.490909	19	85	104	-0.634615	12	79	91	-0.736264	16	52	68	-0.529412	14	75	89	-0.685393	10	96	106	-0.811321	10	91	101	-0.80198	15	114	129	-0.767442	17	87	104	-0.673077	51	32
5	53	58	-0.827586	13	59	72	-0.638889	12	56	68	-0.647059	26	125	151	-0.655629	8	69	77	-0.792208	15	71	86	-0.651163	28	82	110	-0.490909	10	53	63	-0.68254	17	105	122	-0.721311	15	105	120	-0.75	12	98	110	-0.781818	19	94	113	-0.663717	20	29
14	68	82	-0.658537	11	83	94	-0.765957	24	76	100	-0.52	18	113	131	-0.725191	18	81	99	-0.636364	9	68	77	-0.766234	19	84	103	-0.631068	21	62	83	-0.493976	14	77	91	-0.692308	14	113	127	-0.779528	16	107	123	-0.739837	22	119	141	-0.687943	37	39
10	113	123	-0.837398	13	71	84	-0.690476	32	81	113	-0.433628	26	91	117	-0.555556	7	74	81	-0.82716	11	59	70	-0.685714	14	131	145	-0.806897	13	105	118	-0.779661	10	78	88	-0.772727	16	114	130	-0.753846	11	114	125	-0.824	11	98	109	-0.798165	42	37
13	109	122	-0.786885	12	64	76	-0.684211	26	92	118	-0.559322	28	116	144	-0.611111	16	65	81	-0.604938	14	77	91	-0.692308	19	96	115	-0.669565	21	76	97	-0.56701	12	110	122	-0.803279	13	97	110	-0.763636	19	63	82	-0.536585	26	103	129	-0.596899	35	30
17	76	93	-0.634409	15	114	129	-0.767442	18	119	137	-0.737226	32	145	177	-0.638418	13	109	122	-0.786885	6	102	108	-0.888889	17	84	101	-0.663366	22	94	116	-0.62069	14	94	108	-0.740741	12	82	94	-0.744681	13	78	91	-0.714286	12	110	122	-0.803279	39	21
20	102	122	-0.672131	11	57	68	-0.676471	27	84	111	-0.513514	19	124	143	-0.734266	17	82	99	-0.656566	13	86	99	-0.737374	11	103	114	-0.807018	12	81	93	-0.741935	17	77	94	-0.638298	15	87	102	-0.705882	22	97	119	-0.630252	14	79	93	-0.698925	45	25
12	87	99	-0.757576	16	72	88	-0.636364
14	76	90	-0.688889	10	96	106	-0.811321	21.625	85.625		-0.595844	26	117.375		-0.631845	13.75	80.125	93.875	-0.708251	10.875	78	88.875	-0.75008	17.625	87.625	105.25	-0.650361	15.625	76.375	92	-0.65744	12.5	90.5	103	-0.756369	13.625	97	110.625	-0.752791	16	90.25	106.25	-0.678855	17.625	95.25	112.875	-0.685903	37.875	33.75
19	92	111	-0.657658	20	97	117	-0.65812	6.67485	17.6387		0.104489	5.09902	22.3283		0.0811218	4.52769	13.4636	15.1038	0.0859138	3.27054	12.9173	11.8495	0.080821	8	8	8	8	8	8	8	8	8	8	8	8	8	8	8	8	8	8	8	8	8	8	8	8	8	8
24	90	114	-0.578947	32	114	146	-0.561644	8	8		8	8	8		8	8	8	8	8	8	8	8	8	4.95516	23.4882	22.5373	0.114703	4.8679	17.054	18.6471	0.0931132	3.77964	12.9063	13.6591	0.0738131	1.92261	12.3635	13.4583	0.0303039	4	23.7472	22.0049	0.134042	5.15302	15.6912	17.1501	0.0842589	9.14076	11.068
12	97	109	-0.779817	18	64	82	-0.560976	2.35991	6.23623		0.0369426	1.80278	7.89425		0.0286809	1.60078	4.76009	5.34	0.0303751	1.15631	4.56696	4.18943	0.0285745	1.75191	8.30434	7.96813	0.0405537	1.72106	6.0295	6.59274	0.0329205	1.33631	4.56305	4.82923	0.0260969	0.679745	4.37117	4.75822	0.010714	1.41421	8.3959	7.7799	0.0473911	1.82187	5.54768	6.06347	0.02979	3.23175	3.91312
19	90	109	-0.651376	20	75	95	-0.578947
16	72	88	-0.636364	4	81	85	-0.905882
20	85	105	-0.619048	16	98	114	-0.719298
17	83.0625	97.875	-0.697737	14	80.4375	94.4375	-0.707814
8	16	16	16	16	16	16	16
4.24264	17.8754	20.1259	0.0771313	6.72309	18.439	22.4112	0.104455
1.5	4.46884	5.03146	0.0192828	1.68077	4.60974	5.6028	0.0261138
Figure 3F
Poxn-/-								Poxn-/-;rescue SuperA
Putrescine	Agarose	total	PI	Cadaerine	Agarose	total	PI	Putrescine	Agarose	total	PI	Cadaerine	Agarose	total	PI
63	51	114	0.105263	72	68	140	0.0285714	17	75	92	-0.630435	58	107	165	-0.29697
56	53	109	0.0275229	37	42	79	-0.0632911	19	65	84	-0.547619	12	45	57	-0.578947
30	28	58	0.0344828	24	18	42	0.142857	57	104	161	-0.291925	26	58	84	-0.380952
25	28	53	-0.0566038	27	31	58	-0.0689655	16	56	72	-0.555556	15	43	58	-0.482759
23	18	41	0.121951	103	76	179	0.150838	39	68	107	-0.271028	33	84	117	-0.435897
69	66	135	0.0222222	44	38	82	0.0731707	12	56	68	-0.647059	16	45	61	-0.47541
51	48	99	0.030303	48	46	94	0.0212766	27	105	132	-0.590909	15	44	59	-0.491525
28	19	47	0.191489	32	21	53	0.207547	16	48	64	-0.5	19	77	96	-0.604167
43.125	38.875	82	0.0595789	48.375	42.5	90.875	0.0615006	25.375	72.125	97.5	-0.504316	24.25	62.875	87.125	-0.468328
18.6198	17.8601	36.2018	0.0763321	26.7525	20.702	46.7713	0.100969	15.371	21.6296	34.1593	0.145323	15.2854	23.9251	38.3124	0.0996675
8	8	8	8	8	8	8	8	8	8	8	8	8	8	8	8
6.58309	6.31449	12.7993	0.0269875	9.45844	7.31925	16.5361	0.0356978	5.43447	7.64722	12.0771	0.0513796	5.4042	8.4588	13.5455	0.0352378
Figure 3H
w1118								IR76b- #9824								IR6b- (#22729)								IR76b- (mutant1) #51309								IR76b- (mutant2) #51310								UAS-Kir2.1								IR76b-GAl4
Putrescine	Agarose	total	PI	Cadaverine	Agarose	total	PI	Putrescine	Agarose	total	PI	Cadaverine	Agarose	total	PI	Putrescine	Agarose	total	PI	Cadaverine	Agarose	total	PI	Putrescine	Agarose	total	PI	Cadaverine	Agarose	total	PI	Putrescine	Agarose	total	PI	Cadaverine	Agarose	total	PI	Putrescine	Agarose	total	PI	Cadaverine	Agarose	total	PI	Putrescine	Agarose
22	86	108	-0.592593	13	78	91	-0.714286	39	32	71	0.0985915	33	44	77	-0.142857	38	37	75	0.0133333	44	27	71	0.239437	33	36	69	-0.0434783	25	29	54	-0.0740741	24	26	50	-0.04	42	29	71	0.183099	9	98	107	-0.831776	19	74	93	-0.591398	17	98
17	99	116	-0.706897	16	86	102	-0.686275	21	23	44	-0.0454545	34	22	56	0.214286	22	28	50	-0.12	35	38	73	-0.0410959	37	34	71	0.0422535	28	26	54	0.037037	36	33	69	0.0434783	28	32	60	-0.0666667	16	105	121	-0.735537	21	88	109	-0.614679	12	78
14	86	100	-0.72	19	103	122	-0.688525	34	41	75	-0.0933333	45	34	79	0.139241	34	25	59	0.152542	29	22	51	0.137255	22	41	63	-0.301587	31	32	63	-0.015873	39	15	54	0.444444	36	43	79	-0.0886076	23	92	115	-0.6	27	104	131	-0.587786	17	74
23	89	112	-0.589286	27	75	102	-0.470588	25	56	81	-0.382716	29	37	66	-0.121212	17	23	40	-0.15	21	36	57	-0.263158	44	17	61	0.442623	26	34	60	-0.133333	21	33	54	-0.222222	24	19	43	0.116279	24	73	97	-0.505155	26	94	120	-0.566667	13	59
25	94	119	-0.579832	21	92	113	-0.628319	32	21	53	0.207547	35	32	67	0.0447761	28	47	75	-0.253333	36	33	69	0.0434783	43	26	69	0.246377	38	27	65	0.169231	38	32	70	0.0857143	29	27	56	0.0357143	19	67	86	-0.55814	23	103	126	-0.634921	23	89
27	67	94	-0.425532	24	61	85	-0.435294	27	43	70	-0.228571	36	26	62	0.16129	27	19	46	0.173913	49	37	86	0.139535	28	43	71	-0.211268	32	27	59	0.0847458	7	23	30	-0.533333	26	28	54	-0.037037	26	78	104	-0.5	22	84	106	-0.584906	21	91
13	57	78	-0.564103	22	81	103	-0.572816	36	41	77	-0.0649351	41	39	80	0.025	57	42	99	0.151515	25	28	53	-0.0566038	31	36	67	-0.0746269	32	37	69	-0.0724638	46	20	66	0.393939	45	47	92	-0.0217391	13	82	95	-0.726316	32	93	125	-0.488	16	104
16	103	119	-0.731092	16	93	109	-0.706422	38	27	65	0.169231	46	37	83	0.108434	11	46	57	-0.614035	30	33	63	-0.047619	36	19	55	0.309091	43	38	81	0.0617284	15	33	48	-0.375	21	14	35	0.2	16	91	107	-0.700935	36	90	126	-0.428571	24	87
19.625	85.125	105.75	-0.613667	19.75	83.625	103.375	-0.612815	30.5714	36.7143	67.2857	-0.072696	36.1429	33.4286	69.5714	0.0457891	31.8571	31.5714	63.4286	-0.00457563	34.1429	31.5714	65.7143	0.0284067	34	33.2857	67.2857	0.0143276	30.2857	30.2857	60.5714	-0.000675803	30.1429	26	56.1429	0.0245744	32.8571	32.1429	65	0.0172916	18.5714	85	103.571	-0.636703	24.2857	91.4286	115.714	-0.581194	17	84.7143
5.28982	15.7066	14.3502	0.102694	4.65219	12.8945	11.7466	0.109394	6.45128	12.2843	13.598	0.195582	5.30498	7.56873	9.25306	0.138067	13.1076	10.5176	20.7594	0.172037	10.0404	6.02376	12.6322	0.166346	7.95822	9.01322	3.9036	0.258203	4.42396	4.15188	5.56349	0.104847	13.4341	7.07107	14.0526	0.339891	8.21439	9.70272	16.6933	0.100307	6.24118	13.8082	12.0535	0.128688	4.38613	10.5808	13.5365	0.0466642	3.95811	15.4242
8	8	8	8	8	8	8	8	8	8	8	8	8	8	8	8	8	8	8	8	8	8	8	8	8	8	8	8	8	8	8	8	8	8	8	8	8	8	8	8	8	8	8	8	8	8	8	8	8	8
1.87023	5.55311	5.07357	0.0363077	1.6448	4.55889	4.15304	0.0386766	2.28087	4.34317	4.80761	0.0691486	1.8756	2.67595	3.27145	0.048814	4.63424	3.71852	7.33955	0.0608243	3.54982	2.12972	4.46614	0.0588121	2.81366	3.18665	1.38013	0.0912886	1.56411	1.46791	1.96699	0.037069	4.74969	2.5	4.96835	0.12017	2.90423	3.43043	5.90198	0.0354637	2.20659	4.88194	4.26154	0.0454982	1.55073	3.74086	4.78589	0.0164983	1.3994	5.45326
Figure 3I
w1118								UAS-Kir2.1								Gr5a-Gal4								Gr5a-Gal4>Kir2.1								Gr64f-Gal4								Gr64f-Gal4>Kir2.1								Gr66a-Gal4
Putrescine	Agarose	total	PI	Cadaverine	Agarose	total	PI	Putrescine	Agarose	total	PI	Cadaverine	Agarose	total	PI	Putrescine	Agarose	total	PI	Cadaverine	Agarose	total	PI	Putrescine	Agarose	total	PI	Cadaverine	Agarose	total	PI	Putrescine	Agarose	total	PI	Cadaverine	Agarose	total	PI	Putrescine	Agarose	total	PI	Cadaverine	Agarose	total	PI	Putrescine	Agarose
22	86	108	-0.592593	13	78	91	-0.714286	9	98	107	-0.831776	19	74	93	-0.591398	12	87	99	-0.757576	21	86	107	-0.607477	16	67	83	-0.614458	18	76	94	-0.617021	16	77	93	-0.655914	12	76	88	-0.727273	12	78	90	-0.733333	28	77	105	-0.466667	17	88
17	99	116	-0.706897	16	86	102	-0.686275	16	105	121	-0.735537	21	88	109	-0.614679	19	76	95	-0.6	15	92	107	-0.719626	29	83	112	-0.482143	15	93	108	-0.722222	32	109	141	-0.546099	18	83	101	-0.643564	29	116	145	-0.6	21	92	113	-0.628319	13	92
14	86	100	-0.72	19	103	122	-0.688525	23	92	115	-0.6	27	104	131	-0.587786	15	94	109	-0.724771	28	71	99	-0.434343	15	113	128	-0.765625	23	72	95	-0.515789	26	104	130	-0.6	19	56	75	-0.493333	28	134	162	-0.654321	24	74	98	-0.510204	15	84
23	89	112	-0.589286	27	75	102	-0.470588	24	73	97	-0.505155	26	94	120	-0.566667	17	62	79	-0.56962	20	68	88	-0.545455	28	87	115	-0.513043	21	49	70	-0.4	12	87	99	-0.757576	16	81	97	-0.670103	26	56	82	-0.365854	24	61	85	-0.435294	17	45
25	94	119	-0.579832	21	92	113	-0.628319	19	67	86	-0.55814	23	103	126	-0.634921	10	83	93	-0.784946	19	82	101	-0.623762	14	93	107	-0.738318	24	113	137	-0.649635	15	67	82	-0.634146	31	69	100	-0.38	13	58	71	-0.633803	18	43	61	-0.409836	23	76
27	67	94	-0.425532	24	61	85	-0.435294	26	78	104	-0.5	22	84	106	-0.584906	8	91	99	-0.838384	13	102	115	-0.773913	22	37	59	-0.254237	19	124	143	-0.734266	17	57	74	-0.540541	21	75	96	-0.5625	18	39	57	-0.368421	6	59	65	-0.815385	18	86
13	57	78	-0.564103	22	81	103	-0.572816	13	82	95	-0.726316	32	93	125	-0.488	17	88	105	-0.67619	16	81	97	-0.670103	8	68	76	-0.789474	16	65	81	-0.604938	10	84	94	-0.787234	22	53	75	-0.413333	16	63	79	-0.594937	29	83	112	-0.482143	13	92
16	103	119	-0.731092	16	93	109	-0.706422	16	91	107	-0.700935	36	90	126	-0.428571	21	92	113	-0.628319	17	74	91	-0.626374	36	124	160	-0.55	27	61	88	-0.386364	14	64	78	-0.641026	18	87	105	-0.657143	24	56	80	-0.4	13	92	105	-0.752381	14	86
19.625	85.125	105.75	-0.613667	19.75	83.625	103.375	-0.612815	18.25	85.75	104	-0.644732	25.75	91.25	117	-0.562116	14.875	84.125	99	-0.697476	18.625	82	100.625	-0.625132	21	84	105	-0.588412	20.375	81.625	102	-0.578779	17.75	81.125	98.875	-0.645317	19.625	72.5	92.125	-0.568406	20.75	75	95.75	-0.543834	20.375	72.625	93	-0.562528	16.25	81.125
5.28982	15.7066	14.3502	0.102694	4.65219	12.8945	11.7466	0.109394	5.8493	12.9587	11.225	0.121287	5.80025	9.80889	13.0494	0.0691243	4.51782	10.6024	10.583	0.0948288	4.62717	11.3263	8.91127	0.104301	9.39605	27.4799	31.9553	0.179325	4.13824	26.1858	25.956	0.133563	7.45941	18.6505	24.3219	0.0893419	5.52753	12.3982	11.6427	0.127794	6.81909	32.9978	37.1858	0.143981	7.79995	17.229	20.5148	0.152222	3.32738	15.4498
8	8	8	8	8	8	8	8	8	8	8	8	8	8	8	8	8	8	8	8	8	8	8	8	8	8	8	8	8	8	8	8	8	8	8	8	8	8	8	8	8	8	8	8	8	8	8	8	8	8
1.87023	5.55311	5.07357	0.0363077	1.6448	4.55889	4.15304	0.0386766	2.06804	4.5816	3.96863	0.0428815	2.0507	3.46797	4.61364	0.0244391	1.59729	3.74851	3.74166	0.033527	1.63595	4.00446	3.15061	0.0368761	3.322	9.7156	11.2979	0.063401	1.46309	9.25808	9.17683	0.0472215	2.6373	6.59393	8.59908	0.0315871	1.95428	4.38341	4.11633	0.045182	2.41091	11.6665	13.1472	0.0509048	2.7577	6.09138	7.25308	0.0538187	1.1764	5.46233
Figure 3J
IR41a-Gal4;IR76b1/+				IR76b-Gal4;IR76b1/+				GR66a-Gal4;IR76b1/+				UAS-IR76b;IR76b1/+				IR76b-/-				IR41a > IR76b; IR76b1/1				IR76b > IR76b; IR76b1/1				GR66a > IR76b; IR76b1/1
Put	H20	total	P.I	Put	H20	total	P.I	Put	H20	total	P.I	Put	H20	total	P.I	Put	H20	total	P.I	Put	H20	total	P.I	Put	H20	total	P.I	Put	H20	total	P.I
37	4	41	0.804878	42	6	48	0.75	50	6	56	0.785714	37	9	46	0.608696	33	12	45	0.466667	33	0	33	1	45	8	53	0.698113	23	7	30	0.533333
39	7	46	0.695652	37	4	41	0.804878	47	9	56	0.678571	43	6	49	0.755102	41	18	59	0.389831	32	0	32	1	36	3	39	0.846154	30	5	35	0.714286
43	11	54	0.592593	51	7	58	0.758621	44	5	49	0.795918	42	9	51	0.647059	32	16	48	0.333333	47	10	57	0.649123	47	14	61	0.540984	27	29	56	-0.0357143
45	9	54	0.666667	45	6	51	0.764706	37	4	41	0.804878	51	8	59	0.728814	40	19	59	0.355932	32	3	35	0.828571	43	12	55	0.563636	18	20	38	-0.0526316
50	10	60	0.666667	45	6	51	0.764706	39	14	53	0.471698	53	9	62	0.709677	30	14	44	0.363636	29	6	35	0.657143	42	9	51	0.647059	22	14	36	0.222222
42	12	54	0.555556	43	7	50	0.72	51	10	61	0.672131	50	7	57	0.754386	29	11	40	0.45	36	2	38	0.894737	47	11	58	0.62069	35	26	61	0.147541
51	6	57	0.789474	50	9	59	0.694915	44	7	51	0.72549	43	12	55	0.563636	32	27	59	0.0847458	53	12	65	0.630769	43	10	53	0.622642	29	27	56	0.0357143
39	14	53	0.471698	45	16	61	0.47541	45	3	48	0.875	45	9	54	0.666667	26	20	46	0.130435	49	15	64	0.53125	47	7	54	0.740741	23	16	39	0.179487
43.25	9.125	52.375	0.655398	44.75	7.625	52.375	0.716654	44.625	7.25	51.875	0.726175	45.5	8.625	54.125	0.679255	32.875	17.125	50	0.321822	38.875	6	44.875	0.773949	43.75	9.25	53	0.660002	25.875	18	43.875	0.21803
5.14782	3.31393	6.06954	0.113297	4.43203	3.66206	6.6319	0.102788	4.8679	3.61544	6.10474	0.123461	5.39841	1.76777	5.3033	0.0700208	5.19443	5.13914	7.78276	0.140364	9.28036	5.73212	14.476	0.180634	3.7321	3.37004	6.48074	0.0994156	5.40998	9.10259	11.8254	0.27335
8	8	8	8	8	8	8	8	8	8	8	8	8	8	8	8	8	8	8	8	8	8	8	8	8	8	8	8	8	8	8	8
1.82003	1.17165	2.14591	0.0400566	1.56696	1.29474	2.34473	0.0363409	1.72106	1.27825	2.15835	0.04365	1.90863	0.625	1.875	0.0247561	1.83651	1.81696	2.75162	0.049626	3.2811	2.02661	5.11803	0.0638637	1.3195	1.19149	2.29129	0.0351487	1.91272	3.21825	4.1809	0.0966437
[truncated: 22 more columns]

## Sheet: Figure 4 Data
PANEL B-E
Stimulation: putrescine
Genotype: IR76b-Gal4; UAS-GCaMP6f
state: mated female
ROI1		peak max (0mM)	peak max (1mM)	peak max (10mM)	peak max (100mM)			ROI2		peak max (0mM)	peak max (1mM)	peak max (10mM)	peak max (100mM)
	fly-1	20.64	17.03	28.94	56.12				fly-1	12.5	14.74	21.27	35.17
	fly-2	26.97	20.94	22.24	32.07				fly-2	13.04	10.42	20.29	28.19
	fly-3	22.18	19.35	28.81	23.69				fly-3	4.85	10.1	20.88	26.24
	fly-4	14.19	42.22	42.28	31.59				fly-4	5.76	8.98	12.53	20.33
	fly-5	25.17	49.44	64.12	47.61				fly-5	8.64	9.61	9.73	25.69
	fly-6	41.8	63.06	64.49	50.14				fly-6	9.75	7.34	11.47	28.54
	fly-7	37.74	49.46	53.2	27.04				fly-7	6.08	9.68	8.21	32.9
	fly-8	20.38	46.13	36.98	55.87				fly-8	11.15	8.73	12.8	18.96
	fly-9	27.19	49.48	56.99	55.19				fly-9	3.8	5.85	7.04	24.83
	fly-10	20.87	37.86	58.26	35.65				fly-10	6.82	6.74	6.4	11.5
	fly-11	26.35	34.26	31.94	20.02				fly-11	11.47	6.89	6.44	16.7
	AVG	25.7709	39.0209	44.3864	39.5445				AVG	8.53273	9.00727	12.46	24.4591
	STD	7.94203	14.7887	15.5192	13.7354				STD	3.24999	2.43555	5.82046	7.04841
	N	11	11	11	11				N	11	11	11	11
	SEM	2.39461	4.45896	4.67922	4.14138				SEM	0.979908	0.734346	1.75494	2.12518
PANEL F-I
Stimulation: putrescine
Genotype: IR76b-Gal4,GCaMP6f; IR76b1
state: mated female
ROI1		peak max (0mM)	peak max (1mM)	peak max (10mM)	peak max (100mM)			ROI2		peak max (0mM)	peak max (1mM)	peak max (10mM)	peak max (100mM)
	fly-1	4.03	4.82	2.66	3.55				fly-1	4.11	4.45	5.73	8.56
	fly-2	5.96	4.54	5.95	4.62				fly-2	6.86	10.57	8.85	16.53
	fly-3	3.72	5.38	7.18	7.17				fly-3	6.62	7.83	8.89	12.58
	fly-4	7.13	4.89	8.41	19.96				fly-4	8.03	7.54	8.57	8.9
	fly-5	18.98	18.98	11.21	9.08				fly-5	14.34	14.34	8.84	12.47
	fly-6	5.62	6.31	8.39	3.21				fly-6	9.02	7.04	7.63	13.74
	AVG	7.57333	7.48667	7.3	7.93167				AVG	8.16333	8.62833	8.085	12.13
	STD	5.7294	5.66491	2.86618	6.30936				STD	3.44711	3.41164	1.24832	3.0149
	N	6	6	6	6				N	6	6	6	6
	SEM	2.33902	2.31269	1.17011	2.57578				SEM	1.40728	1.39279	0.509626	1.23083
Genotype: IR76bGal4,GCaMP5; IR76b1/+
state: mated female
ROI1		peak max (0mM)	peak max (1mM)	peak max (10mM)	peak max (100mM)			ROI2		peak max (0mM)	peak max (1mM)	peak max (10mM)	peak max (100mM)
	fly-1	16.61	26.3	30.06	21.28				fly-1	11.57	9.72	14.9	28.24
	fly-2	25.57	40.79	36.15	31.77				fly-2	6.31	5.66	13.74	29.65
	fly-3	18.57	47.87	61.64	57.65				fly-3	7.59	10.36	12.45	28.5
	fly-4	21.98	35.61	33.8	36.65				fly-4	8.82	10.73	8.9	30.63
	fly-5	20.62	8.5	24.72	21.81				fly-5	12.21	10.77	10.17	31.57
	fly-6	33.64	45.26	31.28	37.99				fly-6	11.03	17.67	21.54	55.92
	AVG	22.8317	34.055	36.275	34.525				AVG	9.58833	10.8183	13.6167	34.085
	STD	6.11239	14.6791	13.0124	13.3864				STD	2.37528	3.87247	4.47055	10.7708
	N	6	6	6	6				N	6	6	6	6
	SEM	2.49537	5.99272	5.31231	5.46498				SEM	0.969702	1.58093	1.82509	4.39718
PANEL L
Stimulation: putrescine
Genotype: IR76b1
state: mated female
S-type		peak max (100mM)		L-type		peak max (100mM)
	sensillum-1	13			sensillum-1	0
	sensillum-2	30			sensillum-2	2
	sensillum-3	13			sensillum-3	3
	sensillum-4	4			sensillum-4	11
	sensillum-5	25			sensillum-5	3
	sensillum-6	35			sensillum-6	12
	sensillum-7	30			sensillum-7	0
	sensillum-8	8			sensillum-8	0
	AVG	19.75			AVG	3.875
	STD	11.6343			STD	4.88255
	N	8			N	8
	SEM	4.11335			SEM	1.72624
Genotype:W1118
state: mated female
S-type		peak max (100mM)		L-type		peak max (100mM)
	sensillum-1	35			sensillum-1	1
	sensillum-2	3			sensillum-2	0
	sensillum-3	11			sensillum-3	0
	sensillum-4	14			sensillum-4	0
	sensillum-5	15			sensillum-5	0
	sensillum-6	25			sensillum-6	0
	sensillum-7	27			sensillum-7	0
	sensillum-8	27			sensillum-8	6
	AVG	19.625			AVG	0.875
	STD	10.5416			STD	2.10017
	N	8			N	8
	SEM	3.72701			SEM	0.742522

## Sheet: Figure 5 Data
Figure 5B
Canton.S
Position
Observation time	Putrescine	Agarose	total	P.I	Observation time	Putrescine	Agarose	total	P.I	Observation time	Putrescine	Agarose	total	P.I	Observation time	Putrescine	Agarose	total	P.I	Observation time	Putrescine	Agarose	total	P.I	Observation time	Putrescine	Agarose	total	P.I	Observation time	Putrescine	Agarose	total	P.I	Observation time	Putrescine	Agarose	total	P.I
14:00:00	48	3	51	0.882353	14:00:00	51	4	55	0.854545	14:00:00	46	5	51	0.803922	14:00:00	52	2	54	0.925926	14:00:00	38	3	41	0.853659	14:00:00	44	4	48	0.833333	14:00:00	45	2	47	0.914894	14:00:00	36	3	39	0.846154
14:30:00	45	8	53	0.698113	14:30:00	47	9	56	0.678571	14:30:00	37	4	41	0.804878	14:30:00	49	6	55	0.781818	14:30:00	34	5	39	0.74359	14:30:00	41	8	49	0.673469	14:30:00	49	7	56	0.75	14:30:00	24	5	29	0.655172
15:00:00	19	6	25	0.52	15:00:00	22	7	29	0.517241	15:00:00	44	8	52	0.692308	15:00:00	36	6	42	0.714286	15:00:00	27	4	31	0.741935	15:00:00	35	9	44	0.590909	15:00:00	47	6	53	0.773585	15:00:00	41	6	47	0.744681
15:30:00	13	8	21	0.238095	15:30:00	16	12	28	0.142857	15:30:00	21	11	32	0.3125	15:30:00	15	8	23	0.304348	15:30:00	12	6	18	0.333333	15:30:00	46	12	58	0.586207	15:30:00	38	8	46	0.652174	15:30:00	34	4	38	0.789474
16:00:00	23	12	35	0.314286	16:00:00	7	14	21	-0.333333	16:00:00	16	13	29	0.103448	16:00:00	8	12	20	-0.2	16:00:00	18	10	28	0.285714	16:00:00	16	8	24	0.333333	16:00:00	26	12	38	0.368421	16:00:00	13	9	22	0.181818
16:30:00	13	8	21	0.238095	16:30:00	17	16	33	0.030303	16:30:00	14	15	29	-0.0344828	16:30:00	16	15	31	0.0322581	16:30:00	22	7	29	0.517241	16:30:00	8	13	21	-0.238095	16:30:00	16	15	31	0.0322581	16:30:00	19	12	31	0.225806
17:00:00	15	7	22	0.363636	17:00:00	19	7	26	0.461538	17:00:00	19	16	35	0.0857143	17:00:00	17	16	33	0.030303	17:00:00	19	12	31	0.225806	17:00:00	13	12	25	0.04	17:00:00	9	8	17	0.0588235	17:00:00	12	9	21	0.142857
Observation time	Cadaverine	Agarose	total	P.I	Observation time	Cadaverine	Agarose	total	P.I	Observation time	Cadaverine	Agarose	total	P.I	Observation time	Cadaverine	Agarose	total	P.I	Observation time	Cadaverine	Agarose	total	P.I	Observation time	Cadaverine	Agarose	total	P.I	Observation time	Cadaverine	Agarose	total	P.I	Observation time	Cadaverine	Agarose	total	P.I
14:00:00	52	1	53	0.962264	14:00:00	48	6	54	0.777778	14:00:00	52	2	54	0.925926	14:00:00	46	3	49	0.877551	14:00:00	49	4	53	0.849057	14:00:00	47	2	49	0.918367	14:00:00	52	1	53	0.962264	14:00:00	50	1	51	0.960784
14:30:00	49	6	55	0.781818	14:30:00	34	7	41	0.658537	14:30:00	49	7	56	0.75	14:30:00	25	4	29	0.724138	14:30:00	43	7	50	0.72	14:30:00	41	4	45	0.822222	14:30:00	49	3	52	0.884615	14:30:00	36	3	39	0.846154
15:00:00	32	5	37	0.72973	15:00:00	29	3	32	0.8125	15:00:00	42	9	51	0.647059	15:00:00	19	5	24	0.583333	15:00:00	37	13	50	0.48	15:00:00	44	7	51	0.72549	15:00:00	43	5	48	0.791667	15:00:00	45	9	54	0.666667
15:30:00	26	9	35	0.485714	15:30:00	32	8	40	0.6	15:30:00	39	5	44	0.772727	15:30:00	27	12	39	0.384615	15:30:00	18	8	26	0.384615	15:30:00	16	11	27	0.185185	15:30:00	26	7	33	0.575758	15:30:00	41	6	47	0.744681
16:00:00	37	12	49	0.510204	16:00:00	41	12	53	0.54717	16:00:00	21	8	29	0.448276	16:00:00	15	13	28	0.0714286	16:00:00	12	9	21	0.142857	16:00:00	13	14	27	-0.037037	16:00:00	22	11	33	0.333333	16:00:00	8	5	13	0.230769
16:30:00	16	11	27	0.185185	16:30:00	8	13	21	-0.238095	16:30:00	26	12	38	0.368421	16:30:00	21	17	38	0.105263	16:30:00	14	10	24	0.166667	16:30:00	17	10	27	0.259259	16:30:00	20	9	29	0.37931	16:30:00	17	12	29	0.172414
17:00:00	11	9	20	0.1	17:00:00	17	4	21	0.619048	17:00:00	19	15	34	0.117647	17:00:00	18	6	24	0.5	17:00:00	16	11	27	0.185185	17:00:00	21	11	32	0.3125	17:00:00	7	14	21	-0.333333	17:00:00	22	17	39	0.128205
Oviposition
Observation time	Putrescine	Agarose	total	P.I	Observation time	Putrescine	Agarose	total	P.I	Observation time	Putrescine	Agarose	total	P.I	Observation time	Putrescine	Agarose	total	P.I	Observation time	Putrescine	Agarose	total	P.I	Observation time	Putrescine	Agarose	total	P.I	Observation time	Putrescine	Agarose	total	P.I	Observation time	Putrescine	Agarose	total	P.I
14:00:00	0	0	0	0	14:00:00	0	0	0	0	14:00:00	0	0	0	0	14:00:00	0	0	0	0	14:00:00	0	0	0	0	14:00:00	0	0	0	0	14:00:00	0	0	0	0	14:00:00	0	0	0	0
14:30:00	0	24	24	-1	14:30:00	1	7	8	-0.75	14:30:00	1	9	10	-0.8	14:30:00	0	33	33	-1	14:30:00	1	22	23	-0.913043	14:30:00	1	15	16	-0.875	14:30:00	2	53	55	-0.927273	14:30:00	1	34	35	-0.942857
15:00:00	2	45	47	-0.914894	15:00:00	1	36	37	-0.945946	15:00:00	2	45	47	-0.914894	15:00:00	2	79	81	-0.950617	15:00:00	1	65	66	-0.969697	15:00:00	1	42	43	-0.953488	15:00:00	2	94	96	-0.958333	15:00:00	3	67	70	-0.914286
15:30:00	5	72	77	-0.87013	15:30:00	3	74	77	-0.922078	15:30:00	2	69	71	-0.943662	15:30:00	2	102	104	-0.961538	15:30:00	2	98	100	-0.96	15:30:00	3	75	78	-0.923077	15:30:00	2	125	127	-0.968504	15:30:00	4	96	100	-0.92
16:00:00	5	81	86	-0.883721	16:00:00	5	81	86	-0.883721	16:00:00	3	82	85	-0.929412	16:00:00	5	114	119	-0.915966	16:00:00	2	117	119	-0.966387	16:00:00	3	89	92	-0.934783	16:00:00	3	149	152	-0.960526	16:00:00	6	107	113	-0.893805
16:30:00	7	94	101	-0.861386	16:30:00	8	94	102	-0.843137	16:30:00	7	102	109	-0.87156	16:30:00	8	135	143	-0.888112	16:30:00	5	128	133	-0.924812	16:30:00	5	116	121	-0.917355	16:30:00	6	161	167	-0.928144	16:30:00	6	116	122	-0.901639
17:00:00	9	102	111	-0.837838	17:00:00	11	108	119	-0.815126	17:00:00	10	116	126	-0.84127	17:00:00	8	147	155	-0.896774	17:00:00	5	143	148	-0.932432	17:00:00	11	132	143	-0.846154	17:00:00	7	172	179	-0.921788	17:00:00	8	118	126	-0.873016
Observation time	Cadaverine	Agarose	total	P.I	Observation time	Cadaverine	Agarose	total	P.I	Observation time	Cadaverine	Agarose	total	P.I	Observation time	Cadaverine	Agarose	total	P.I	Observation time	Cadaverine	Agarose	total	P.I	Observation time	Cadaverine	Agarose	total	P.I	Observation time	Cadaverine	Agarose	total	P.I	Observation time	Cadaverine	Agarose	total	P.I
14:00:00	0	0	0	0	14:00:00	0	0	0	0	14:00:00	0	0	0	0	14:00:00	0	0	0	0	14:00:00	0	0	0	0	14:00:00	0	0	0	0	14:00:00	0	0	0	0	14:00:00	0	0	0	0
14:30:00	1	13	14	-0.857143	14:30:00	2	19	21	-0.809524	14:30:00	0	24	24	-1	14:30:00	4	32	36	-0.777778	14:30:00	0	19	19	-1	14:30:00	0	33	33	-1	14:30:00	4	43	47	-0.829787	14:30:00	2	43	45	-0.911111
15:00:00	4	48	52	-0.846154	15:00:00	3	45	48	-0.875	15:00:00	1	59	60	-0.966667	15:00:00	4	83	87	-0.908046	15:00:00	1	46	47	-0.957447	15:00:00	3	69	72	-0.916667	15:00:00	5	81	86	-0.883721	15:00:00	3	84	87	-0.931034
15:30:00	5	76	81	-0.876543	15:30:00	4	84	88	-0.909091	15:30:00	1	82	83	-0.975904	15:30:00	7	106	113	-0.876106	15:30:00	2	79	81	-0.950617	15:30:00	5	92	97	-0.896907	15:30:00	5	116	121	-0.917355	15:30:00	5	126	131	-0.923664
16:00:00	5	84	89	-0.88764	16:00:00	7	98	105	-0.866667	16:00:00	4	107	111	-0.927928	16:00:00	7	114	121	-0.884298	16:00:00	2	84	86	-0.953488	16:00:00	5	108	113	-0.911504	16:00:00	7	128	135	-0.896296	16:00:00	5	139	144	-0.930556
16:30:00	8	98	106	-0.849057	16:30:00	12	106	118	-0.79661	16:30:00	6	118	124	-0.903226	16:30:00	9	132	141	-0.87234	16:30:00	7	102	109	-0.87156	16:30:00	6	126	132	-0.909091	16:30:00	12	136	148	-0.837838	16:30:00	6	150	156	-0.923077
17:00:00	10	105	115	-0.826087	17:00:00	14	121	135	-0.792593	17:00:00	8	126	134	-0.880597	17:00:00	12	147	159	-0.849057	17:00:00	9	124	133	-0.864662	17:00:00	8	137	145	-0.889655	17:00:00	14	148	162	-0.82716	17:00:00	9	163	172	-0.895349
Figure 5C
poxN-/-
Position
Observation time	Putrescine	Agarose	total	P.I	Observation time	Putrescine	Agarose	total	P.I	Observation time	Putrescine	Agarose	total	P.I	Observation time	Putrescine	Agarose	total	P.I	Observation time	Putrescine	Agarose	total	P.I	Observation time	Putrescine	Agarose	total	P.I	Observation time	Putrescine	Agarose	total	P.I	Observation time	Putrescine	Agarose	total	P.I
14:00:00	52	2	54	0.925926	14:00:00	57	6	63	0.809524	14:00:00	45	3	48	0.875	14:00:00	43	6	49	0.755102	14:00:00	48	7	55	0.745455	14:00:00	44	7	51	0.72549	14:00:00	57	5	62	0.83871	14:00:00	45	5	50	0.8
14:30:00	28	1	29	0.931034	14:30:00	54	6	60	0.8	14:30:00	42	6	48	0.75	14:30:00	33	9	42	0.571429	14:30:00	22	12	34	0.294118	14:30:00	39	6	45	0.733333	14:30:00	34	11	45	0.511111	14:30:00	38	4	42	0.809524
15:00:00	23	8	31	0.483871	15:00:00	42	9	51	0.647059	15:00:00	44	4	48	0.833333	15:00:00	31	11	42	0.47619	15:00:00	28	1	29	0.931034	15:00:00	44	11	55	0.6	15:00:00	45	13	58	0.551724	15:00:00	33	12	45	0.466667
15:30:00	27	12	39	0.384615	15:30:00	47	12	59	0.59322	15:30:00	38	9	47	0.617021	15:30:00	29	14	43	0.348837	15:30:00	36	9	45	0.6	15:30:00	41	6	47	0.744681	15:30:00	38	6	44	0.727273	15:30:00	24	9	33	0.454545
16:00:00	21	11	32	0.3125	16:00:00	36	14	50	0.44	16:00:00	22	11	33	0.333333	16:00:00	25	15	40	0.25	16:00:00	21	11	32	0.3125	16:00:00	37	17	54	0.37037	16:00:00	29	9	38	0.526316	16:00:00	28	15	43	0.302326
16:30:00	29	19	48	0.208333	16:30:00	28	19	47	0.191489	16:30:00	29	13	42	0.380952	16:30:00	22	12	34	0.294118	16:30:00	19	16	35	0.0857143	16:30:00	25	12	37	0.351351	16:30:00	26	14	40	0.3	16:30:00	22	11	33	0.333333
17:00:00	24	23	47	0.0212766	17:00:00	30	22	52	0.153846	17:00:00	24	16	40	0.2	17:00:00	26	19	45	0.155556	17:00:00	23	13	36	0.277778	17:00:00	29	16	45	0.288889	17:00:00	22	11	33	0.333333	17:00:00	29	17	46	0.26087
Observation time	Cadaverine	Agarose	total	P.I	Observation time	Cadaverine	Agarose	total	P.I	Observation time	Cadaverine	Agarose	total	P.I	Observation time	Cadaverine	Agarose	total	P.I	Observation time	Cadaverine	Agarose	total	P.I	Observation time	Cadaverine	Agarose	total	P.I	Observation time	Cadaverine	Agarose	total	P.I	Observation time	Cadaverine	Agarose	total	P.I
14:00:00	43	5	48	0.791667	14:00:00	56	3	59	0.898305	14:00:00	49	2	51	0.921569	14:00:00	46	5	51	0.803922	14:00:00	45	4	49	0.836735	14:00:00	49	8	57	0.719298	14:00:00	45	4	49	0.836735	14:00:00	39	2	41	0.902439
14:30:00	38	3	41	0.853659	14:30:00	54	5	59	0.830508	14:30:00	45	7	52	0.730769	14:30:00	38	6	44	0.727273	14:30:00	38	1	39	0.948718	14:30:00	38	6	44	0.727273	14:30:00	33	5	38	0.736842	14:30:00	37	6	43	0.72093
15:00:00	32	6	38	0.684211	15:00:00	43	9	52	0.653846	15:00:00	39	4	43	0.813953	15:00:00	31	11	42	0.47619	15:00:00	34	3	37	0.837838	15:00:00	43	12	55	0.563636	15:00:00	33	8	41	0.609756	15:00:00	30	8	38	0.578947
15:30:00	27	9	36	0.5	15:30:00	47	10	57	0.649123	15:30:00	36	12	48	0.5	15:30:00	28	16	44	0.272727	15:30:00	26	8	34	0.529412	15:30:00	26	5	31	0.677419	15:30:00	25	2	27	0.851852	15:30:00	26	12	38	0.368421
16:00:00	21	12	33	0.272727	16:00:00	36	12	48	0.5	16:00:00	24	13	37	0.297297	16:00:00	25	19	44	0.136364	16:00:00	21	11	32	0.3125	16:00:00	24	19	43	0.116279	16:00:00	22	8	30	0.466667	16:00:00	22	9	31	0.419355
16:30:00	28	9	37	0.513514	16:30:00	29	13	42	0.380952	16:30:00	27	16	43	0.255814	16:30:00	21	17	38	0.105263	16:30:00	20	14	34	0.176471	16:30:00	25	14	39	0.282051	16:30:00	26	17	43	0.209302	16:30:00	27	11	38	0.421053
17:00:00	25	13	38	0.315789	17:00:00	31	13	44	0.409091	17:00:00	26	18	44	0.181818	17:00:00	19	15	34	0.117647	17:00:00	16	13	29	0.103448	17:00:00	24	18	42	0.142857	17:00:00	20	13	33	0.212121	17:00:00	24	15	39	0.230769
Oviposition
Observation time	Putrescine	Agarose	total	P.I	Observation time	Putrescine	Agarose	total	P.I	Observation time	Putrescine	Agarose	total	P.I	Observation time	Putrescine	Agarose	total	P.I	Observation time	Putrescine	Agarose	total	P.I	Observation time	Putrescine	Agarose	total	P.I	Observation time	Putrescine	Agarose	total	P.I	Observation time	Putrescine	Agarose	total	P.I
14:00:00	0	0	0	0	14:00:00	0	0	0	0	14:00:00	0	0	0	0	14:00:00	0	0	0	0	14:00:00	0	0	0	0	14:00:00	0	0	0	0	14:00:00	0	0	0	0	14:00:00	0	0	0	0
14:30:00	2	3	5	-0.2	14:30:00	2	3	5	-0.2	14:30:00	1	2	3	-0.333333	14:30:00	1	6	7	-0.714286	14:30:00	2	1	3	0.333333	14:30:00	2	1	3	0.333333	14:30:00	3	0	3	1	14:30:00	2	3	5	-0.2
15:00:00	2	3	5	-0.2	15:00:00	4	4	8	0	15:00:00	1	3	4	-0.5	15:00:00	2	6	8	-0.5	15:00:00	2	1	3	0.333333	15:00:00	2	2	4	0	15:00:00	3	2	5	0.2	15:00:00	6	7	13	-0.0769231
15:30:00	2	4	6	-0.333333	15:30:00	8	5	13	0.230769	15:30:00	1	4	5	-0.6	15:30:00	2	7	9	-0.555556	15:30:00	4	2	6	0.333333	15:30:00	3	5	8	-0.25	15:30:00	4	6	10	-0.2	15:30:00	11	12	23	-0.0434783
16:00:00	6	5	11	0.0909091	16:00:00	8	9	17	-0.0588235	16:00:00	4	5	9	-0.111111	16:00:00	4	8	12	-0.333333	16:00:00	4	8	12	-0.333333	16:00:00	5	7	12	-0.166667	16:00:00	6	6	12	0	16:00:00	14	15	29	-0.0344828
16:30:00	9	7	16	0.125	16:30:00	11	11	22	0	16:30:00	5	5	10	0	16:30:00	12	11	23	0.0434783	16:30:00	5	8	13	-0.230769	16:30:00	8	7	15	0.0666667	16:30:00	6	8	14	-0.142857	16:30:00	13	18	31	-0.16129
17:00:00	12	8	20	0.2	17:00:00	15	13	28	0.0714286	17:00:00	7	6	13	0.0769231	17:00:00	14	13	27	0.037037	17:00:00	6	10	16	-0.25	17:00:00	9	7	16	0.125	17:00:00	7	8	15	-0.0666667	17:00:00	14	20	34	-0.176471
Observation time	Cadaverine	Agarose	total	P.I	Observation time	Cadaverine	Agarose	total	P.I	Observation time	Cadaverine	Agarose	total	P.I	Observation time	Cadaverine	Agarose	total	P.I	Observation time	Cadaverine	Agarose	total	P.I	Observation time	Cadaverine	Agarose	total	P.I	Observation time	Cadaverine	Agarose	total	P.I	Observation time	Cadaverine	Agarose	total	P.I
14:00:00	0	0	0	0	14:00:00	0	0	0	0	14:00:00	0	0	0	0	14:00:00	0	0	0	0	14:00:00	0	0	0	0	14:00:00	0	0	0	0	14:00:00	0	0	0	0	14:00:00	0	0	0	0
14:30:00	2	2	4	0	14:30:00	3	2	5	0.2	14:30:00	2	1	3	0.333333	14:30:00	2	3	5	-0.2	14:30:00	2	2	4	0	14:30:00	1	4	5	-0.6	14:30:00	3	5	8	-0.25	14:30:00	2	3	5	-0.2
15:00:00	4	5	9	-0.111111	15:00:00	3	4	7	-0.142857	15:00:00	2	2	4	0	15:00:00	2	3	5	-0.2	15:00:00	2	2	4	0	15:00:00	2	3	5	-0.2	15:00:00	5	5	10	0	15:00:00	3	3	6	0
15:30:00	4	5	9	-0.111111	15:30:00	5	7	12	-0.166667	15:30:00	5	4	9	0.111111	15:30:00	4	6	10	-0.2	15:30:00	4	4	8	0	15:30:00	4	3	7	0.142857	15:30:00	6	7	13	-0.0769231	15:30:00	5	4	9	0.111111
16:00:00	6	8	14	-0.142857	16:00:00	6	8	14	-0.142857	16:00:00	5	6	11	-0.0909091	16:00:00	5	6	11	-0.0909091	16:00:00	5	4	9	0.111111	16:00:00	4	4	8	0	16:00:00	6	8	14	-0.142857	16:00:00	6	7	13	-0.0769231
16:30:00	8	11	19	-0.157895	16:30:00	7	8	15	-0.0666667	16:30:00	6	6	12	0	16:30:00	6	8	14	-0.142857	16:30:00	5	6	11	-0.0909091	16:30:00	4	5	9	-0.111111	16:30:00	7	9	16	-0.125	16:30:00	7	8	15	-0.0666667
17:00:00	9	12	21	-0.142857	17:00:00	9	11	20	-0.1	17:00:00	8	7	15	0.0666667	17:00:00	8	9	17	-0.0588235	17:00:00	6	7	13	-0.0769231	17:00:00	4	6	10	-0.2	17:00:00	9	11	20	-0.1	17:00:00	11	10	21	0.047619
Poxn rescue (superA)
Position
Observation time	Putrescine	Agarose	total	P.I	Observation time	Putrescine	Agarose	total	P.I	Observation time	Putrescine	Agarose	total	P.I	Observation time	Putrescine	Agarose	total	P.I	Observation time	Putrescine	Agarose	total	P.I	Observation time	Putrescine	Agarose	total	P.I	Observation time	Putrescine	Agarose	total	P.I	Observation time	Putrescine	Agarose	total	P.I
14:00:00	52	2	54	0.925926	14:00:00	55	3	58	0.896552	14:00:00	56	5	61	0.836066	14:00:00	52	2	54	0.925926	14:00:00	38	3	41	0.853659	14:00:00	54	8	62	0.741935	14:00:00	54	2	56	0.928571	14:00:00	50	2	52	0.923077
14:30:00	48	8	56	0.714286	14:30:00	41	6	47	0.744681	14:30:00	47	4	51	0.843137	14:30:00	49	6	55	0.781818	14:30:00	34	5	39	0.74359	14:30:00	42	11	53	0.584906	14:30:00	49	7	56	0.75	14:30:00	44	5	49	0.795918
15:00:00	28	9	37	0.513514	15:00:00	45	4	49	0.836735	15:00:00	32	8	40	0.6	15:00:00	26	6	32	0.625	15:00:00	39	4	43	0.813953	15:00:00	36	9	45	0.6	15:00:00	47	6	53	0.773585	15:00:00	41	6	47	0.744681
15:30:00	33	12	45	0.466667	15:30:00	39	9	48	0.625	15:30:00	30	11	41	0.463415	15:30:00	15	8	23	0.304348	15:30:00	34	6	40	0.7	15:30:00	46	12	58	0.586207	15:30:00	38	8	46	0.652174	15:30:00	28	12	40	0.4
16:00:00	25	18	43	0.162791	16:00:00	26	11	37	0.405405	16:00:00	26	13	39	0.333333	16:00:00	28	12	40	0.4	16:00:00	18	12	30	0.2	16:00:00	26	8	34	0.529412	16:00:00	26	12	38	0.368421	16:00:00	23	9	32	0.4375
16:30:00	21	12	33	0.272727	16:30:00	31	13	44	0.409091	16:30:00	24	15	39	0.230769	16:30:00	26	11	37	0.405405	16:30:00	22	7	29	0.517241	16:30:00	28	13	41	0.365854	16:30:00	16	8	24	0.333333	16:30:00	29	12	41	0.414634
17:00:00	19	16	35	0.0857143	17:00:00	24	11	35	0.371429	17:00:00	19	16	35	0.0857143	17:00:00	27	13	40	0.35	17:00:00	29	9	38	0.526316	17:00:00	23	12	35	0.314286	17:00:00	19	17	36	0.0555556	17:00:00	12	19	31	-0.225806
Observation time	Cadaverine	Agarose	total	P.I	Observation time	Cadaverine	Agarose	total	P.I	Observation time	Cadaverine	Agarose	total	P.I	Observation time	Cadaverine	Agarose	total	P.I	Observation time	Cadaverine	Agarose	total	P.I	Observation time	Cadaverine	Agarose	total	P.I	Observation time	Cadaverine	Agarose	total	P.I	Observation time	Cadaverine	Agarose	total	P.I
14:00:00	50	2	52	0.923077	14:00:00	55	2	57	0.929825	14:00:00	52	1	53	0.962264	14:00:00	46	3	49	0.877551	14:00:00	49	4	53	0.849057	14:00:00	48	2	50	0.92	14:00:00	52	1	53	0.962264	14:00:00	51	1	52	0.961538
14:30:00	48	2	50	0.92	14:30:00	47	5	52	0.807692	14:30:00	49	4	53	0.849057	14:30:00	25	4	29	0.724138	14:30:00	43	7	50	0.72	14:30:00	41	4	45	0.822222	14:30:00	49	3	52	0.884615	14:30:00	46	6	52	0.769231
15:00:00	34	5	39	0.74359	15:00:00	39	7	46	0.695652	15:00:00	42	8	50	0.68	15:00:00	19	5	24	0.583333	15:00:00	37	13	50	0.48	15:00:00	44	9	53	0.660377	15:00:00	43	5	48	0.791667	15:00:00	45	11	56	0.607143
15:30:00	26	5	31	0.677419	15:30:00	32	18	50	0.28	15:30:00	39	11	50	0.56	15:30:00	27	12	39	0.384615	15:30:00	28	8	36	0.555556	15:30:00	26	11	37	0.405405	15:30:00	26	7	33	0.575758	15:30:00	41	16	57	0.438596
16:00:00	22	11	33	0.333333	16:00:00	20	19	39	0.025641	16:00:00	21	9	30	0.4	16:00:00	15	13	28	0.0714286	16:00:00	22	9	31	0.419355	16:00:00	33	13	46	0.434783	16:00:00	22	11	33	0.333333	16:00:00	28	15	43	0.302326
16:30:00	20	13	33	0.212121	16:30:00	18	16	34	0.0588235	16:30:00	26	12	38	0.368421	16:30:00	21	17	38	0.105263	16:30:00	25	10	35	0.428571	16:30:00	27	10	37	0.459459	16:30:00	20	9	29	0.37931	16:30:00	19	12	31	0.225806
17:00:00	16	19	35	-0.0857143	17:00:00	17	17	34	0	17:00:00	19	15	34	0.117647	17:00:00	18	16	34	0.0588235	17:00:00	28	16	44	0.272727	17:00:00	21	12	33	0.272727	17:00:00	17	14	31	0.0967742	17:00:00	22	17	39	0.128205
Oviposition
Observation time	Putrescine	Agarose	total	P.I	Observation time	Putrescine	Agarose	total	P.I	Observation time	Putrescine	Agarose	total	P.I	Observation time	Putrescine	Agarose	total	P.I	Observation time	Putrescine	Agarose	total	P.I	Observation time	Putrescine	Agarose	total	P.I	Observation time	Putrescine	Agarose	total	P.I	Observation time	Putrescine	Agarose	total	P.I
14:00:00	0	0	0	0	14:00:00	0	0	0	0	14:00:00	0	0	0	0	14:00:00	0	0	0	0	14:00:00	0	0	0	0	14:00:00	0	0	0	0	14:00:00	0	0	0	0	14:00:00	0	0	0	0
14:30:00	2	22	24	-0.833333	14:30:00	4	7	11	-0.272727	14:30:00	1	19	20	-0.9	14:30:00	2	3	5	-0.2	14:30:00	3	22	25	-0.76	14:30:00	2	15	17	-0.764706	14:30:00	3	13	16	-0.625	14:30:00	2	24	26	-0.846154
15:00:00	4	45	49	-0.836735	15:00:00	7	36	43	-0.674419	15:00:00	3	31	34	-0.823529	15:00:00	6	17	23	-0.478261	15:00:00	4	35	39	-0.794872	15:00:00	3	38	41	-0.853659	15:00:00	5	24	29	-0.655172	15:00:00	4	37	41	-0.804878
15:30:00	5	72	77	-0.87013	15:30:00	12	74	86	-0.72093	15:30:00	3	48	51	-0.882353	15:30:00	14	29	43	-0.348837	15:30:00	12	48	60	-0.6	15:30:00	6	56	62	-0.806452	15:30:00	5	45	50	-0.8	15:30:00	5	56	61	-0.836066
16:00:00	7	81	88	-0.840909	16:00:00	15	82	97	-0.690722	16:00:00	5	67	72	-0.861111	16:00:00	17	44	61	-0.442623	16:00:00	17	57	74	-0.540541	16:00:00	7	62	69	-0.797101	16:00:00	13	69	82	-0.682927	16:00:00	6	61	67	-0.820896
16:30:00	7	94	101	-0.861386	16:30:00	18	99	117	-0.692308	16:30:00	7	79	86	-0.837209	16:30:00	18	53	71	-0.492958	16:30:00	19	68	87	-0.563218	16:30:00	9	71	80	-0.775	16:30:00	16	71	87	-0.632184	16:30:00	6	76	82	-0.853659
17:00:00	9	99	108	-0.833333	17:00:00	18	103	121	-0.702479	17:00:00	10	82	92	-0.782609	17:00:00	18	67	85	-0.576471	17:00:00	22	74	96	-0.541667	17:00:00	11	82	93	-0.763441	17:00:00	17	72	89	-0.617978	17:00:00	8	88	96	-0.833333
Observation time	Cadaverine	Agarose	total	P.I	Observation time	Cadaverine	Agarose	total	P.I	Observation time	Cadaverine	Agarose	total	P.I	Observation time	Cadaverine	Agarose	total	P.I	Observation time	Cadaverine	Agarose	total	P.I	Observation time	Cadaverine	Agarose	total	P.I	Observation time	Cadaverine	Agarose	total	P.I	Observation time	Cadaverine	Agarose	total	P.I
14:00:00	0	0	0	0	14:00:00	0	0	0	0	14:00:00	0	0	0	0	14:00:00	0	0	0	0	14:00:00	0	0	0	0	14:00:00	0	0	0	0	14:00:00	0	0	0	0	14:00:00	0	0	0	0
14:30:00	1	23	24	-0.916667	14:30:00	2	29	31	-0.870968	14:30:00	0	14	14	-1	14:30:00	4	12	16	-0.5	14:30:00	0	16	16	-1	14:30:00	0	13	13	-1	14:30:00	4	43	47	-0.829787	14:30:00	5	14	19	-0.473684
15:00:00	3	49	52	-0.884615	15:00:00	4	35	39	-0.794872	15:00:00	4	34	38	-0.789474	15:00:00	4	33	37	-0.783784	15:00:00	5	36	41	-0.756098	15:00:00	3	39	42	-0.857143	15:00:00	5	81	86	-0.883721	15:00:00	6	35	41	-0.707317
15:30:00	3	76	79	-0.924051	15:30:00	4	56	60	-0.866667	15:30:00	6	55	61	-0.803279	15:30:00	7	46	53	-0.735849	15:30:00	6	41	47	-0.744681	15:30:00	5	52	57	-0.824561	15:30:00	5	116	121	-0.917355	15:30:00	8	56	64	-0.75
16:00:00	5	88	93	-0.892473	16:00:00	7	79	86	-0.837209	16:00:00	9	67	76	-0.763158	16:00:00	7	55	62	-0.774194	16:00:00	8	56	64	-0.75	16:00:00	5	69	74	-0.864865	16:00:00	7	128	135	-0.896296	16:00:00	10	69	79	-0.746835
16:30:00	8	91	99	-0.838384	16:30:00	11	81	92	-0.76087	16:30:00	12	71	83	-0.710843	16:30:00	9	62	71	-0.746479	16:30:00	11	61	72	-0.694444	16:30:00	6	76	82	-0.853659	16:30:00	12	136	148	-0.837838	16:30:00	11	71	82	-0.731707
17:00:00	11	97	108	-0.796296	17:00:00	13	102	115	-0.773913	17:00:00	12	78	90	-0.733333	17:00:00	12	67	79	-0.696203	17:00:00	13	74	87	-0.701149	17:00:00	8	87	95	-0.831579	17:00:00	14	148	162	-0.82716	17:00:00	11	76	87	-0.747126
Figure 5D
IR41a-Gal4
Position
Observation time	Putrescine	Agarose	total	P.I	Observation time	Putrescine	Agarose	total	P.I	Observation time	Putrescine	Agarose	total	P.I	Observation time	Putrescine	Agarose	total	P.I	Observation time	Putrescine	Agarose	total	P.I	Observation time	Putrescine	Agarose	total	P.I	Observation time	Putrescine	Agarose	total	P.I	Observation time	Putrescine	Agarose	total	P.I
14:00:00	51	2	53	0.924528	14:00:00	55	4	59	0.864407	14:00:00	39	6	45	0.733333	14:00:00	56	2	58	0.931034	14:00:00	42	7	49	0.714286	14:00:00	47	6	53	0.773585	14:00:00	42	5	47	0.787234	14:00:00	39	1	40	0.95
14:30:00	43	4	47	0.829787	14:30:00	47	2	49	0.918367	14:30:00	41	2	43	0.906977	14:30:00	58	1	59	0.966102	14:30:00	37	9	46	0.608696	14:30:00	42	8	50	0.68	14:30:00	46	7	53	0.735849	14:30:00	26	4	30	0.733333
15:00:00	35	3	38	0.842105	15:00:00	34	7	41	0.658537	15:00:00	39	5	44	0.772727	15:00:00	41	7	48	0.708333	15:00:00	45	8	53	0.698113	15:00:00	38	11	49	0.55102	15:00:00	28	7	35	0.6	15:00:00	33	6	39	0.692308
15:30:00	42	8	50	0.68	15:30:00	37	11	48	0.541667	15:30:00	41	9	50	0.64	15:30:00	38	11	49	0.55102	15:30:00	31	11	42	0.47619	15:30:00	35	17	52	0.346154	15:30:00	37	13	50	0.48	15:30:00	38	12	50	0.52
16:00:00	28	10	38	0.473684	16:00:00	33	15	48	0.375	16:00:00	26	12	38	0.368421	16:00:00	24	9	33	0.454545	16:00:00	22	15	37	0.189189	16:00:00	25	14	39	0.282051	16:00:00	39	16	55	0.418182	16:00:00	26	8	34	0.529412
16:30:00	31	12	43	0.44186	16:30:00	21	12	33	0.272727	16:30:00	33	24	57	0.157895	16:30:00	25	17	42	0.190476	16:30:00	16	12	28	0.142857	16:30:00	22	12	34	0.294118	16:30:00	26	15	41	0.268293	16:30:00	18	13	31	0.16129
17:00:00	28	15	43	0.302326	17:00:00	19	16	35	0.0857143	17:00:00	22	19	41	0.0731707	17:00:00	29	26	55	0.0545455	17:00:00	29	17	46	0.26087	17:00:00	20	16	36	0.111111	17:00:00	12	16	28	-0.142857	17:00:00	22	16	38	0.157895
Observation time	Cadaverine	Agarose	total	P.I	Observation time	Cadaverine	Agarose	total	P.I	Observation time	Cadaverine	Agarose	total	P.I	Observation time	Cadaverine	Agarose	total	P.I	Observation time	Cadaverine	Agarose	total	P.I	Observation time	Cadaverine	Agarose	total	P.I	Observation time	Cadaverine	Agarose	total	P.I	Observation time	Cadaverine	Agarose	total	P.I
14:00:00	56	7	63	0.777778	14:00:00	57	3	60	0.9	14:00:00	42	6	48	0.75	14:00:00	42	1	43	0.953488	14:00:00	51	7	58	0.758621	14:00:00	52	6	58	0.793103	14:00:00	47	2	49	0.918367	14:00:00	38	12	50	0.52
14:30:00	48	5	53	0.811321	14:30:00	38	8	46	0.652174	14:30:00	40	3	43	0.860465	14:30:00	46	7	53	0.735849	14:30:00	45	12	57	0.578947	14:30:00	45	8	53	0.698113	14:30:00	56	6	62	0.806452	14:30:00	36	8	44	0.636364
15:00:00	51	11	62	0.645161	15:00:00	45	7	52	0.730769	15:00:00	28	5	33	0.69697	15:00:00	33	3	36	0.833333	15:00:00	41	4	45	0.822222	15:00:00	39	12	51	0.529412	15:00:00	41	12	53	0.54717	15:00:00	33	11	44	0.5
15:30:00	39	14	53	0.471698	15:30:00	27	13	40	0.35	15:30:00	36	9	45	0.6	15:30:00	36	9	45	0.6	15:30:00	36	11	47	0.531915	15:30:00	36	9	45	0.6	15:30:00	31	8	39	0.589744	15:30:00	27	10	37	0.459459
16:00:00	34	12	46	0.478261	16:00:00	33	7	40	0.65	16:00:00	23	11	34	0.352941	16:00:00	41	10	51	0.607843	16:00:00	30	9	39	0.538462	16:00:00	21	16	37	0.135135	16:00:00	27	14	41	0.317073	16:00:00	22	14	36	0.222222
16:30:00	32	17	49	0.306122	16:30:00	23	16	39	0.179487	16:30:00	27	17	44	0.227273	16:30:00	26	14	40	0.3	16:30:00	28	13	41	0.365854	16:30:00	19	13	32	0.1875	16:30:00	22	11	33	0.333333	16:30:00	19	8	27	0.407407
17:00:00	21	15	36	0.166667	17:00:00	19	13	32	0.1875	17:00:00	21	13	34	0.235294	17:00:00	22	16	38	0.157895	17:00:00	21	14	35	0.2	17:00:00	23	17	40	0.15	17:00:00	18	10	28	0.285714	17:00:00	25	17	42	0.190476
Oviposition
Observation time	Putrescine	Agarose	total	P.I	Observation time	Putrescine	Agarose	total	P.I	Observation time	Putrescine	Agarose	total	P.I	Observation time	Putrescine	Agarose	total	P.I	Observation time	Putrescine	Agarose	total	P.I	Observation time	Putrescine	Agarose	total	P.I	Observation time	Putrescine	Agarose	total	P.I	Observation time	Putrescine	Agarose	total	P.I
14:00:00	0	0	0	0	14:00:00	0	0	0	0	14:00:00	0	0	0	0	14:00:00	0	0	0	0	14:00:00	0	0	0	0	14:00:00	0	0	0	0	14:00:00	0	0	0	0	14:00:00	0	0	0	0
14:30:00	1	6	7	-0.714286	14:30:00	1	22	23	-0.913043	14:30:00	1	27	28	-0.928571	14:30:00	3	12	15	-0.6	14:30:00	1	27	28	-0.928571	14:30:00	3	51	54	-0.888889	14:30:00	1	8	9	-0.777778	14:30:00	4	29	33	-0.757576
15:00:00	5	29	34	-0.705882	15:00:00	3	45	48	-0.875	15:00:00	2	39	41	-0.902439	15:00:00	3	23	26	-0.769231	15:00:00	3	39	42	-0.857143	15:00:00	5	46	51	-0.803922	15:00:00	3	9	12	-0.5	15:00:00	7	38	45	-0.688889
15:30:00	7	42	49	-0.714286	15:30:00	4	67	71	-0.887324	15:30:00	7	48	55	-0.745455	15:30:00	3	48	51	-0.882353	15:30:00	7	56	63	-0.777778	15:30:00	5	55	60	-0.833333	15:30:00	5	35	40	-0.75	15:30:00	7	54	61	-0.770492
16:00:00	9	74	83	-0.783133	16:00:00	8	72	80	-0.8	16:00:00	11	74	85	-0.741176	16:00:00	12	71	83	-0.710843	16:00:00	9	79	88	-0.795455	16:00:00	9	59	68	-0.735294	16:00:00	7	59	66	-0.787879	16:00:00	11	67	78	-0.717949
16:30:00	14	112	126	-0.777778	16:30:00	12	98	110	-0.781818	16:30:00	11	112	123	-0.821138	16:30:00	13	109	122	-0.786885	16:30:00	14	101	115	-0.756522	16:30:00	14	71	85	-0.670588	16:30:00	7	73	80	-0.825	16:30:00	14	124	138	-0.797101
17:00:00	17	118	135	-0.748148	17:00:00	12	107	119	-0.798319	17:00:00	11	118	129	-0.829457	17:00:00	13	114	127	-0.795276	17:00:00	15	105	120	-0.75	17:00:00	14	89	103	-0.728155	17:00:00	9	95	104	-0.826923	17:00:00	17	128	145	-0.765517
Observation time	Cadaverine	Agarose	total	P.I	Observation time	Cadaverine	Agarose	total	P.I	Observation time	Cadaverine	Agarose	total	P.I	Observation time	Cadaverine	Agarose	total	P.I	Observation time	Cadaverine	Agarose	total	P.I	Observation time	Cadaverine	Agarose	total	P.I	Observation time	Cadaverine	Agarose	total	P.I	Observation time	Cadaverine	Agarose	total	P.I
14:00:00	0	0	0	0	14:00:00	0	0	0	0	14:00:00	0	0	0	0	14:00:00	1	0	1	0	14:00:00	0	0	0	0	14:00:00	0	0	0	0	14:00:00	0	0	0	0	14:00:00	0	0	0	0
14:30:00	1	14	15	-0.866667	14:30:00	0	22	22	-1	14:30:00	2	14	16	-0.75	14:30:00	3	23	26	-0.769231	14:30:00	1	24	25	-0.92	14:30:00	1	31	32	-0.9375	14:30:00	4	34	38	-0.789474	14:30:00	5	24	29	-0.655172
15:00:00	4	29	33	-0.757576	15:00:00	4	34	38	-0.789474	15:00:00	3	29	32	-0.8125	15:00:00	3	38	41	-0.853659	15:00:00	2	39	41	-0.902439	15:00:00	4	47	51	-0.843137	15:00:00	7	39	46	-0.695652	15:00:00	8	45	53	-0.698113
15:30:00	7	46	53	-0.735849	15:30:00	4	65	69	-0.884058	15:30:00	7	46	53	-0.735849	15:30:00	7	65	72	-0.805556	15:30:00	5	65	70	-0.857143	15:30:00	7	66	73	-0.808219	15:30:00	8	43	51	-0.686275	15:30:00	8	67	75	-0.786667
16:00:00	11	69	80	-0.725	16:00:00	8	89	97	-0.835052	16:00:00	7	69	76	-0.815789	16:00:00	9	78	87	-0.793103	16:00:00	9	78	87	-0.793103	16:00:00	13	69	82	-0.682927	16:00:00	8	56	64	-0.75	16:00:00	12	81	93	-0.741935
16:30:00	11	78	89	-0.752809	16:30:00	9	95	104	-0.826923	16:30:00	11	78	89	-0.752809	16:30:00	11	89	100	-0.78	16:30:00	11	92	103	-0.786408	16:30:00	13	72	85	-0.694118	16:30:00	12	76	88	-0.727273	16:30:00	15	109	124	-0.758065
17:00:00	11	121	132	-0.833333	17:00:00	9	111	120	-0.85	17:00:00	12	121	133	-0.819549	17:00:00	11	103	114	-0.807018	17:00:00	12	101	113	-0.787611	17:00:00	15	90	105	-0.714286	17:00:00	13	82	95	-0.726316	17:00:00	15	113	128	-0.765625
IR41a-Gal4>kir2.1
Position
Observation time	Putrescine	Agarose	total	P.I	Observation time	Putrescine	Agarose	total	P.I	Observation time	Putrescine	Agarose	total	P.I	Observation time	Putrescine	Agarose	total	P.I	Observation time	Putrescine	Agarose	total	P.I	Observation time	Putrescine	Agarose	total	P.I	Observation time	Putrescine	Agarose	total	P.I	Observation time	Putrescine	Agarose	total	P.I
14:00:00	34	23	57	0.192982	14:00:00	31	25	56	0.107143	14:00:00	24	29	53	-0.0943396	14:00:00	38	21	59	0.288136	14:00:00	26	24	50	0.04	14:00:00	31	28	59	0.0508475	14:00:00	28	24	52	0.0769231	14:00:00	26	29	55	-0.0545455
14:30:00	24	21	45	0.0666667	14:30:00	23	28	51	-0.0980392	14:30:00	28	23	51	0.0980392	14:30:00	23	34	57	-0.192982	14:30:00	31	27	58	0.0689655	14:30:00	33	26	59	0.118644	14:30:00	21	26	47	-0.106383	14:30:00	24	27	51	-0.0588235
15:00:00	28	21	49	0.142857	15:00:00	29	38	67	-0.134328	15:00:00	29	21	50	0.16	15:00:00	30	28	58	0.0344828	15:00:00	25	22	47	0.0638298	15:00:00	35	25	60	0.166667	15:00:00	29	24	53	0.0943396	15:00:00	27	26	53	0.0188679
15:30:00	32	27	59	0.0847458	15:30:00	33	34	67	-0.0149254	15:30:00	32	28	60	0.0666667	15:30:00	27	26	53	0.0188679	15:30:00	24	32	56	-0.142857	15:30:00	21	32	53	-0.207547	15:30:00	37	33	70	0.0571429	15:30:00	32	24	56	0.142857
16:00:00	28	33	61	-0.0819672	16:00:00	37	31	68	0.0882353	16:00:00	39	29	68	0.147059	16:00:00	25	22	47	0.0638298	16:00:00	19	27	46	-0.173913	16:00:00	29	18	47	0.234043	16:00:00	33	28	61	0.0819672	16:00:00	29	31	60	-0.0333333
16:30:00	32	18	50	0.28	16:30:00	21	26	47	-0.106383	16:30:00	31	22	53	0.169811	16:30:00	34	23	57	0.192982	16:30:00	32	25	57	0.122807	16:30:00	23	22	45	0.0222222	16:30:00	24	21	45	0.0666667	16:30:00	22	28	50	-0.12
17:00:00	12	37	49	-0.510204	17:00:00	24	29	53	-0.0943396	17:00:00	22	26	48	-0.0833333	17:00:00	16	23	39	-0.179487	17:00:00	21	28	49	-0.142857	17:00:00	34	22	56	0.214286	17:00:00	27	24	51	0.0588235	17:00:00	26	28	54	-0.037037
Observation time	Cadaverine	Agarose	total	P.I	Observation time	Cadaverine	Agarose	total	P.I	Observation time	Cadaverine	Agarose	total	P.I	Observation time	Cadaverine	Agarose	total	P.I	Observation time	Cadaverine	Agarose	total	P.I	Observation time	Cadaverine	Agarose	total	P.I	Observation time	Cadaverine	Agarose	total	P.I	Observation time	Cadaverine	Agarose	total	P.I
14:00:00	32	35	67	-0.0447761	14:00:00	22	22	44	0	14:00:00	35	25	60	0.166667	14:00:00	29	34	63	-0.0793651	14:00:00	29	12	41	0.414634	14:00:00	24	28	52	-0.0769231	14:00:00	37	29	66	0.121212	14:00:00	29	22	51	0.137255
14:30:00	26	22	48	0.0833333	14:30:00	37	27	64	0.15625	14:30:00	23	27	50	-0.08	14:30:00	26	33	59	-0.118644	14:30:00	22	26	48	-0.0833333	14:30:00	28	26	54	0.037037	14:30:00	33	23	56	0.178571	14:30:00	27	28	55	-0.0181818
15:00:00	27	28	55	-0.0181818	15:00:00	31	29	60	0.0333333	15:00:00	38	21	59	0.288136	15:00:00	25	21	46	0.0869565	15:00:00	24	25	49	-0.0204082	15:00:00	32	24	56	0.142857	15:00:00	26	26	52	0	15:00:00	33	31	64	0.03125
15:30:00	25	24	49	0.0204082	15:30:00	28	18	46	0.217391	15:30:00	21	34	55	-0.236364	15:30:00	24	29	53	-0.0943396	15:30:00	31	28	59	0.0508475	15:30:00	27	15	42	0.285714	15:30:00	24	21	45	0.0666667	15:30:00	22	21	43	0.0232558
16:00:00	16	27	43	-0.255814	16:00:00	36	24	60	0.2	16:00:00	19	31	50	-0.24	16:00:00	21	16	37	0.135135	16:00:00	33	19	52	0.269231	16:00:00	22	21	43	0.0232558	16:00:00	27	27	54	0	16:00:00	29	29	58	0
16:30:00	23	30	53	-0.132075	16:30:00	29	23	52	0.115385	16:30:00	27	26	53	0.0188679	16:30:00	23	29	52	-0.115385	16:30:00	29	24	53	0.0943396	16:30:00	29	24	53	0.0943396	16:30:00	33	22	55	0.2	16:30:00	27	31	58	-0.0689655
17:00:00	46	26	72	0.277778	17:00:00	25	38	63	-0.206349	17:00:00	26	28	54	-0.037037	17:00:00	25	37	62	-0.193548	17:00:00	26	21	47	0.106383	17:00:00	26	28	54	-0.037037	17:00:00	29	25	54	0.0740741	17:00:00	24	25	49	-0.0204082
Oviposition
Observation time	Putrescine	Agarose	total	P.I	Observation time	Putrescine	Agarose	total	P.I	Observation time	Putrescine	Agarose	total	P.I	Observation time	Putrescine	Agarose	total	P.I	Observation time	Putrescine	Agarose	total	P.I	Observation time	Putrescine	Agarose	total	P.I	Observation time	Putrescine	Agarose	total	P.I	Observation time	Putrescine	Agarose	total	P.I
14:00:00	0	0	0	0	14:00:00	0	0	0	0	14:00:00	0	0	0	0	14:00:00	0	0	0	0	14:00:00	0	0	0	0	14:00:00	0	0	0	0	14:00:00	0	0	0	0	14:00:00	0	0	0	0
14:30:00	5	13	18	-0.444444	14:30:00	2	13	15	-0.733333	14:30:00	0	13	13	-1	14:30:00	1	9	10	-0.8	14:30:00	2	13	15	-0.733333	14:30:00	3	12	15	-0.6	14:30:00	2	13	15	-0.733333	14:30:00	1	12	13	-0.846154
15:00:00	6	27	33	-0.636364	15:00:00	4	25	29	-0.724138	15:00:00	4	37	41	-0.804878	15:00:00	4	21	25	-0.68	15:00:00	3	39	42	-0.857143	15:00:00	3	33	36	-0.833333	15:00:00	4	28	32	-0.75	15:00:00	3	35	38	-0.842105
15:30:00	9	49	58	-0.689655	15:30:00	9	49	58	-0.689655	15:30:00	6	68	74	-0.837838	15:30:00	7	58	65	-0.784615	15:30:00	6	68	74	-0.837838	15:30:00	4	58	62	-0.870968	15:30:00	6	45	51	-0.764706	15:30:00	5	65	70	-0.857143
16:00:00	13	61	74	-0.648649	16:00:00	12	67	79	-0.696203	16:00:00	8	81	89	-0.820225	16:00:00	7	79	86	-0.837209	16:00:00	6	78	84	-0.857143	16:00:00	5	74	79	-0.873418	16:00:00	6	68	74	-0.837838	16:00:00	5	78	83	-0.879518
16:30:00	16	89	105	-0.695238	16:30:00	13	73	86	-0.697674	16:30:00	11	92	103	-0.786408	16:30:00	11	92	103	-0.786408	16:30:00	7	80	87	-0.83908	16:30:00	7	89	96	-0.854167	16:30:00	7	79	86	-0.837209	16:30:00	8	89	97	-0.835052
17:00:00	16	101	117	-0.726496	17:00:00	17	81	98	-0.653061	17:00:00	12	104	116	-0.793103	17:00:00	14	112	126	-0.777778	17:00:00	7	86	93	-0.849462	17:00:00	9	102	111	-0.837838	17:00:00	7	86	93	-0.849462	17:00:00	11	102	113	-0.80531
Observation time	Cadaverine	Agarose	total	P.I	Observation time	Cadaverine	Agarose	total	P.I	Observation time	Cadaverine	Agarose	total	P.I	Observation time	Cadaverine	Agarose	total	P.I	Observation time	Cadaverine	Agarose	total	P.I	Observation time	Cadaverine	Agarose	total	P.I	Observation time	Cadaverine	Agarose	total	P.I	Observation time	Cadaverine	Agarose	total	P.I
14:00:00	0	0	0	0	14:00:00	0	0	0	0	14:00:00	0	0	0	0	14:00:00	1	0	1	0	14:00:00	0	0	0	0	14:00:00	0	0	0	0	14:00:00	0	0	0	0	14:00:00	0	0	0	0
14:30:00	1	14	15	-0.866667	14:30:00	1	9	10	-0.8	14:30:00	4	6	10	-0.2	14:30:00	2	9	11	-0.636364	14:30:00	2	17	19	-0.789474	14:30:00	2	13	15	-0.733333	14:30:00	2	13	15	-0.733333	14:30:00	2	14	16	-0.75
15:00:00	5	46	51	-0.803922	15:00:00	3	24	27	-0.777778	15:00:00	5	13	18	-0.444444	15:00:00	9	26	35	-0.485714	15:00:00	2	25	27	-0.851852	15:00:00	3	36	39	-0.846154	15:00:00	2	38	40	-0.9	15:00:00	2	34	36	-0.888889
15:30:00	7	66	73	-0.808219	15:30:00	8	47	55	-0.709091	15:30:00	9	36	45	-0.6	15:30:00	12	69	81	-0.703704	15:30:00	3	46	49	-0.877551	15:30:00	4	52	56	-0.857143	15:30:00	5	59	64	-0.84375	15:30:00	2	57	59	-0.932203
16:00:00	9	79	88	-0.795455	16:00:00	12	77	89	-0.730337	16:00:00	11	67	78	-0.717949	16:00:00	13	96	109	-0.761468	16:00:00	3	78	81	-0.925926	16:00:00	4	67	71	-0.887324	16:00:00	9	76	85	-0.788235	16:00:00	4	79	83	-0.903614
16:30:00	11	91	102	-0.784314	16:30:00	12	92	104	-0.769231	16:30:00	13	75	88	-0.704545	16:30:00	16	101	117	-0.726496	16:30:00	7	96	103	-0.864078	16:30:00	6	79	85	-0.858824	16:30:00	12	84	96	-0.75	16:30:00	6	86	92	-0.869565
17:00:00	16	113	129	-0.751938	17:00:00	17	110	127	-0.732283	17:00:00	15	82	97	-0.690722	17:00:00	14	102	116	-0.758621	17:00:00	9	115	124	-0.854839	17:00:00	7	85	92	-0.847826	17:00:00	17	94	111	-0.693694	17:00:00	7	92	99	-0.858586
IR76b-Gal4
Position
Observation time	Putrescine	Agarose	total	P.I	Observation time	Putrescine	Agarose	total	P.I	Observation time	Putrescine	Agarose	total	P.I	Observation time	Putrescine	Agarose	total	P.I	Observation time	Putrescine	Agarose	total	P.I	Observation time	Putrescine	Agarose	total	P.I	Observation time	Putrescine	Agarose	total	P.I	Observation time	Putrescine	Agarose	total	P.I
14:00:00	43	5	48	0.791667	14:00:00	52	5	57	0.824561	14:00:00	48	1	49	0.959184	14:00:00	47	2	49	0.918367	14:00:00	42	4	46	0.826087	14:00:00	47	3	50	0.88	14:00:00	48	4	52	0.846154	14:00:00	42	5	47	0.787234
14:30:00	38	2	40	0.9	14:30:00	47	4	51	0.843137	14:30:00	45	7	52	0.730769	14:30:00	38	5	43	0.767442	14:30:00	39	3	42	0.857143	14:30:00	32	6	38	0.684211	14:30:00	36	6	42	0.714286	14:30:00	50	7	57	0.754386
15:00:00	41	8	49	0.673469	15:00:00	37	5	42	0.761905	15:00:00	39	9	48	0.625	15:00:00	31	8	39	0.589744	15:00:00	45	6	51	0.764706	15:00:00	37	5	42	0.761905	15:00:00	38	9	47	0.617021	15:00:00	39	6	45	0.733333
15:30:00	23	9	32	0.4375	15:30:00	34	7	41	0.658537	15:30:00	22	13	35	0.257143	15:30:00	34	9	43	0.581395	15:30:00	29	9	38	0.526316	15:30:00	41	13	54	0.518519	15:30:00	36	12	48	0.5	15:30:00	31	4	35	0.771429
16:00:00	29	13	42	0.380952	16:00:00	23	9	32	0.4375	16:00:00	27	9	36	0.5	16:00:00	26	9	35	0.485714	16:00:00	21	9	30	0.4	16:00:00	28	9	37	0.513514	16:00:00	21	8	29	0.448276	16:00:00	29	19	48	0.208333
16:30:00	12	19	31	-0.225806	16:30:00	32	12	44	0.454545	16:30:00	21	34	55	-0.236364	16:30:00	23	13	36	0.277778	16:30:00	17	11	28	0.214286	16:30:00	18	7	25	0.44	16:30:00	23	14	37	0.243243	16:30:00	30	12	42	0.428571
17:00:00	18	12	30	0.2	17:00:00	27	14	41	0.317073	17:00:00	16	27	43	-0.255814	17:00:00	17	13	30	0.133333	17:00:00	20	16	36	0.111111	17:00:00	23	12	35	0.314286	17:00:00	20	13	33	0.212121	17:00:00	28	18	46	0.217391
Observation time	Cadaverine	Agarose	total	P.I	Observation time	Cadaverine	Agarose	total	P.I	Observation time	Cadaverine	Agarose	total	P.I	Observation time	Cadaverine	Agarose	total	P.I	Observation time	Cadaverine	Agarose	total	P.I	Observation time	Cadaverine	Agarose	total	P.I	Observation time	Cadaverine	Agarose	total	P.I	Observation time	Cadaverine	Agarose	total	P.I
	number of Flies					number of Flies					number of Flies					number of Flies					number of Flies					number of Flies					number of Flies					number of Flies
14:00:00	37	3	40	0.85	14:00:00	56	9	65	0.723077	14:00:00	49	5	54	0.814815	14:00:00	46	5	51	0.803922	14:00:00	54	3	57	0.894737	14:00:00	49	2	51	0.921569	14:00:00	45	4	49	0.836735	14:00:00	39	2	41	0.902439
14:30:00	41	1	42	0.952381	14:30:00	44	5	49	0.795918	14:30:00	31	2	33	0.878788	14:30:00	38	6	44	0.727273	14:30:00	38	7	45	0.688889	14:30:00	48	4	52	0.846154	14:30:00	33	5	38	0.736842	14:30:00	37	6	43	0.72093
15:00:00	31	6	37	0.675676	15:00:00	36	9	45	0.6	15:00:00	40	4	44	0.818182	15:00:00	31	2	33	0.878788	15:00:00	34	3	37	0.837838	15:00:00	43	12	55	0.563636	15:00:00	33	11	44	0.5	15:00:00	30	8	38	0.578947
15:30:00	26	3	29	0.793103	15:30:00	47	10	57	0.649123	15:30:00	36	12	48	0.5	15:30:00	28	11	39	0.435897	15:30:00	26	8	34	0.529412	15:30:00	26	5	31	0.677419	15:30:00	25	2	27	0.851852	15:30:00	26	12	38	0.368421
16:00:00	22	10	32	0.375	16:00:00	32	12	44	0.454545	16:00:00	24	13	37	0.297297	16:00:00	24	13	37	0.297297	16:00:00	17	11	28	0.214286	16:00:00	24	9	33	0.454545	16:00:00	22	8	30	0.466667	16:00:00	22	9	31	0.419355
16:30:00	18	2	20	0.8	16:30:00	29	13	42	0.380952	16:30:00	14	4	18	0.555556	16:30:00	21	17	38	0.105263	16:30:00	20	14	34	0.176471	16:30:00	25	14	39	0.282051	16:30:00	26	17	43	0.209302	16:30:00	27	11	38	0.421053
17:00:00	21	13	34	0.235294	17:00:00	24	13	37	0.297297	17:00:00	12	17	29	-0.172414	17:00:00	20	15	35	0.142857	17:00:00	16	13	29	0.103448	17:00:00	24	18	42	0.142857	17:00:00	20	13	33	0.212121	17:00:00	24	15	39	0.230769
Oviposition
Observation time	Putrescine	Agarose	total	P.I	Observation time	Putrescine	Agarose	total	P.I	Observation time	Putrescine	Agarose	total	P.I	Observation time	Putrescine	Agarose	total	P.I	Observation time	Putrescine	Agarose	total	P.I	Observation time	Putrescine	Agarose	total	P.I	Observation time	Putrescine	Agarose	total	P.I	Observation time	Putrescine	Agarose	total	P.I
	number of eggs					number of eggs					number of eggs					number of eggs					number of eggs					number of eggs					number of eggs					number of eggs
14:00:00	0	0	0	0	14:00:00	0	0	0	0	14:00:00	0	0	0	0	14:00:00	0	0	0	0	14:00:00	0	0	0	0	14:00:00	0	0	0	0	14:00:00	0	0	0	0	14:00:00	0	0	0	0
14:30:00	2	5	7	-0.428571	14:30:00	1	8	9	-0.777778	14:30:00	1	26	27	-0.925926	14:30:00	3	7	10	-0.4	14:30:00	1	24	25	-0.92	14:30:00	1	12	13	-0.846154	14:30:00	1	24	25	-0.92	14:30:00	1	23	24	-0.916667
15:00:00	2	28	30	-0.866667	15:00:00	2	26	28	-0.857143	15:00:00	2	50	52	-0.923077	15:00:00	4	29	33	-0.757576	15:00:00	1	61	62	-0.967742	15:00:00	2	27	29	-0.862069	15:00:00	2	46	48	-0.916667	15:00:00	1	49	50	-0.96
15:30:00	5	45	50	-0.8	15:30:00	5	48	53	-0.811321	15:30:00	2	78	80	-0.95	15:30:00	6	52	58	-0.793103	15:30:00	2	87	89	-0.955056	15:30:00	2	56	58	-0.931034	15:30:00	2	61	63	-0.936508	15:30:00	3	70	73	-0.917808
16:00:00	9	67	76	-0.763158	16:00:00	7	77	84	-0.833333	16:00:00	4	91	95	-0.915789	16:00:00	6	78	84	-0.857143	16:00:00	3	109	112	-0.946429	16:00:00	5	78	83	-0.879518	16:00:00	3	79	82	-0.926829	16:00:00	5	87	92	-0.891304
16:30:00	12	86	98	-0.755102	16:30:00	11	89	100	-0.78	16:30:00	5	104	109	-0.908257	16:30:00	8	98	106	-0.849057	16:30:00	3	114	117	-0.948718	16:30:00	5	89	94	-0.893617	16:30:00	3	104	107	-0.943925	16:30:00	7	94	101	-0.861386
17:00:00	15	107	122	-0.754098	17:00:00	11	102	113	-0.80531	17:00:00	9	123	132	-0.863636	17:00:00	8	104	112	-0.857143	17:00:00	5	119	124	-0.919355	17:00:00	8	106	114	-0.859649	17:00:00	5	116	121	-0.917355	17:00:00	9	106	115	-0.843478
Observation time	Cadaverine	Agarose	total	P.I	Observation time	Cadaverine	Agarose	total	P.I	Observation time	Cadaverine	Agarose	total	P.I	Observation time	Cadaverine	Agarose	total	P.I	Observation time	Cadaverine	Agarose	total	P.I	Observation time	Cadaverine	Agarose	total	P.I	Observation time	Cadaverine	Agarose	total	P.I	Observation time	Cadaverine	Agarose	total	P.I
	number of eggs					number of eggs					number of eggs					number of eggs					number of eggs					number of eggs					number of eggs					number of eggs
14:00:00	0	0	0	0	14:00:00	0	0	0	0	14:00:00	0	0	0	0	14:00:00	0	0	0	0	14:00:00	0	0	0	0	14:00:00	0	0	0	0	14:00:00	0	0	0	0	14:00:00	0	0	0	0
14:30:00	3	24	27	-0.777778	14:30:00	1	14	15	-0.866667	14:30:00	2	25	27	-0.851852	14:30:00	1	54	55	-0.963636	14:30:00	3	26	29	-0.793103	14:30:00	2	17	19	-0.789474	14:30:00	4	19	23	-0.652174	14:30:00	3	30	33	-0.818182
15:00:00	3	39	42	-0.857143	15:00:00	2	39	41	-0.902439	15:00:00	4	55	59	-0.864407	15:00:00	2	78	80	-0.95	15:00:00	7	49	56	-0.75	15:00:00	2	39	41	-0.902439	15:00:00	5	37	42	-0.761905	15:00:00	4	55	59	-0.864407
15:30:00	8	56	64	-0.75	15:30:00	2	56	58	-0.931034	15:30:00	7	76	83	-0.831325	15:30:00	2	99	101	-0.960396	15:30:00	9	68	77	-0.766234	15:30:00	3	56	59	-0.898305	15:30:00	7	66	73	-0.808219	15:30:00	6	74	80	-0.85
16:00:00	9	78	87	-0.793103	16:00:00	6	67	73	-0.835616	16:00:00	10	88	98	-0.795918	16:00:00	4	106	110	-0.927273	16:00:00	11	79	90	-0.755556	16:00:00	4	76	80	-0.9	16:00:00	9	78	87	-0.793103	16:00:00	8	86	94	-0.829787
16:30:00	9	81	90	-0.8	16:30:00	6	78	84	-0.857143	16:30:00	16	100	116	-0.724138	16:30:00	4	123	127	-0.937008	16:30:00	18	107	125	-0.712	16:30:00	5	88	93	-0.892473	16:30:00	9	107	116	-0.844828	16:30:00	9	97	106	-0.830189
17:00:00	10	101	111	-0.81982	17:00:00	7	82	89	-0.842697	17:00:00	16	106	122	-0.737705	17:00:00	7	135	142	-0.901408	17:00:00	18	115	133	-0.729323	17:00:00	7	97	104	-0.865385	17:00:00	9	112	121	-0.85124	17:00:00	9	105	114	-0.842105
IR76b-Gal4>Kir2.1
Position
Observation time	Putrescine	Agarose	total	P.I	Observation time	Putrescine	Agarose	total	P.I	Observation time	Putrescine	Agarose	total	P.I	Observation time	Putrescine	Agarose	total	P.I	Observation time	Putrescine	Agarose	total	P.I	Observation time	Putrescine	Agarose	total	P.I	Observation time	Putrescine	Agarose	total	P.I	Observation time	Putrescine	Agarose	total	P.I
14:00:00	34	21	55	0.236364	14:00:00	22	24	46	-0.0434783	14:00:00	23	27	50	-0.08	14:00:00	23	29	52	-0.115385	14:00:00	37	30	67	0.104478	14:00:00	25	30	55	-0.0909091	14:00:00	23	28	51	-0.0980392	14:00:00	25	26	51	-0.0196078
14:30:00	28	23	51	0.0980392	14:30:00	25	21	46	0.0869565	14:30:00	27	24	51	0.0588235	14:30:00	21	32	53	-0.207547	14:30:00	33	25	58	0.137931	14:30:00	33	25	58	0.137931	14:30:00	33	19	52	0.269231	14:30:00	33	28	61	0.0819672
15:00:00	26	28	54	-0.037037	15:00:00	20	18	38	0.0526316	15:00:00	21	28	49	-0.142857	15:00:00	25	26	51	-0.0196078	15:00:00	24	24	48	0	15:00:00	29	24	53	0.0943396	15:00:00	29	17	46	0.26087	15:00:00	26	16	42	0.238095
15:30:00	32	22	54	0.185185	15:30:00	28	22	50	0.12	15:30:00	26	29	55	-0.0545455	15:30:00	28	28	56	0	15:30:00	26	26	52	0	15:30:00	27	24	51	0.0588235	15:30:00	24	23	47	0.0212766	15:30:00	27	19	46	0.173913
16:00:00	31	25	56	0.107143	16:00:00	25	21	46	0.0869565	16:00:00	28	23	51	0.0980392	16:00:00	27	22	49	0.102041	16:00:00	27	21	48	0.125	16:00:00	26	26	52	0	16:00:00	28	27	55	0.0181818	16:00:00	27	24	51	0.0588235
16:30:00	25	32	57	-0.122807	16:30:00	29	29	58	0	16:30:00	23	25	48	-0.0416667	16:30:00	29	25	54	0.0740741	16:30:00	33	27	60	0.1	16:30:00	24	21	45	0.0666667	16:30:00	21	21	42	0	16:30:00	33	22	55	0.2
17:00:00	21	27	48	-0.125	17:00:00	27	33	60	-0.1	17:00:00	29	26	55	0.0545455	17:00:00	25	26	51	-0.0196078	17:00:00	29	24	53	0.0943396	17:00:00	33	27	60	0.1	17:00:00	24	26	50	-0.04	17:00:00	32	29	61	0.0491803
Observation time	Cadaverine	Agarose	total	P.I	Observation time	Cadaverine	Agarose	total	P.I	Observation time	Cadaverine	Agarose	total	P.I	Observation time	Cadaverine	Agarose	total	P.I	Observation time	Cadaverine	Agarose	total	P.I	Observation time	Cadaverine	Agarose	total	P.I	Observation time	Cadaverine	Agarose	total	P.I	Observation time	Cadaverine	Agarose	total	P.I
14:00:00	27	22	49	0.102041	14:00:00	27	24	51	0.0588235	14:00:00	24	22	46	0.0434783	14:00:00	29	13	42	0.380952	14:00:00	29	23	52	0.115385	14:00:00	22	29	51	-0.137255	14:00:00	24	22	46	0.0434783	14:00:00	26	23	49	0.0612245
14:30:00	22	12	34	0.294118	14:30:00	32	22	54	0.185185	14:30:00	27	29	56	-0.0357143	14:30:00	22	24	46	-0.0434783	14:30:00	23	26	49	-0.0612245	14:30:00	32	23	55	0.163636	14:30:00	26	26	52	0	14:30:00	23	28	51	-0.0980392
15:00:00	23	17	40	0.15	15:00:00	26	24	50	0.04	15:00:00	21	23	44	-0.0454545	15:00:00	23	22	45	0.0222222	15:00:00	26	28	54	-0.037037	15:00:00	27	25	52	0.0384615	15:00:00	25	24	49	0.0204082	15:00:00	21	26	47	-0.106383
15:30:00	24	22	46	0.0434783	15:30:00	36	21	57	0.263158	15:30:00	32	25	57	0.122807	15:30:00	21	21	42	0	15:30:00	21	16	37	0.135135	15:30:00	24	21	45	0.0666667	15:30:00	21	32	53	-0.207547	15:30:00	27	34	61	-0.114754
16:00:00	32	17	49	0.306122	16:00:00	23	21	44	0.0454545	16:00:00	29	28	57	0.0175439	16:00:00	22	14	36	0.222222	16:00:00	27	19	46	0.173913	16:00:00	24	25	49	-0.0204082	16:00:00	23	27	50	-0.08	16:00:00	22	29	51	-0.137255
16:30:00	21	23	44	-0.0454545	16:30:00	32	28	60	0.0666667	16:30:00	26	24	50	0.04	16:30:00	12	18	30	-0.2	16:30:00	22	24	46	-0.0434783	16:30:00	28	24	52	0.0769231	16:30:00	29	25	54	0.0740741	16:30:00	25	23	48	0.0416667
17:00:00	28	31	59	-0.0508475	17:00:00	27	23	50	0.08	17:00:00	19	25	44	-0.136364	17:00:00	19	32	51	-0.254902	17:00:00	25	26	51	-0.0196078	17:00:00	21	26	47	-0.106383	17:00:00	24	28	52	-0.0769231	17:00:00	30	28	58	0.0344828
Oviposition
Observation time	Putrescine	Agarose	total	P.I	Observation time	Putrescine	Agarose	total	P.I	Observation time	Putrescine	Agarose	total	P.I	Observation time	Putrescine	Agarose	total	P.I	Observation time	Putrescine	Agarose	total	P.I	Observation time	Putrescine	Agarose	total	P.I	Observation time	Putrescine	Agarose	total	P.I	Observation time	Putrescine	Agarose	total	P.I
14:00:00	0	0	0	0	14:00:00	0	0	0	0	14:00:00	0	0	0	0	14:00:00	0	0	0	0	14:00:00	0	0	0	0	14:00:00	0	0	0	0	14:00:00	0	0	0	0	14:00:00	0	0	0	0
14:30:00	0	2	2	-1	14:30:00	2	1	3	0.333333	14:30:00	1	4	5	-0.6	14:30:00	4	3	7	0.142857	14:30:00	1	2	3	-0.333333	14:30:00	1	2	3	-0.333333	14:30:00	1	2	3	-0.333333	14:30:00	0	1	1	-1
15:00:00	2	3	5	-0.2	15:00:00	2	2	4	0	15:00:00	2	4	6	-0.333333	15:00:00	4	3	7	0.142857	15:00:00	2	2	4	0	15:00:00	1	2	3	-0.333333	15:00:00	2	2	4	0	15:00:00	1	1	2	0
15:30:00	5	3	8	0.25	15:30:00	6	4	10	0.2	15:30:00	4	5	9	-0.111111	15:30:00	4	3	7	0.142857	15:30:00	2	2	4	0	15:30:00	3	3	6	0	15:30:00	2	3	5	-0.2	15:30:00	1	2	3	-0.333333
16:00:00	7	3	10	0.4	16:00:00	6	4	10	0.2	16:00:00	4	5	9	-0.111111	16:00:00	5	3	8	0.25	16:00:00	4	2	6	0.333333	16:00:00	4	4	8	0	16:00:00	3	3	6	0	16:00:00	3	3	6	0
16:30:00	7	6	13	0.0769231	16:30:00	8	5	13	0.230769	16:30:00	7	8	15	-0.0666667	16:30:00	5	5	10	0	16:30:00	5	3	8	0.25	16:30:00	4	6	10	-0.2	16:30:00	4	4	8	0	16:30:00	3	4	7	-0.142857
17:00:00	9	6	15	0.2	17:00:00	9	9	18	0	17:00:00	10	8	18	0.111111	17:00:00	5	5	10	0	17:00:00	5	4	9	0.111111	17:00:00	5	6	11	-0.0909091	17:00:00	5	5	10	0	17:00:00	4	5	9	-0.111111
Observation time	Cadaverine	Agarose	total	P.I	Observation time	Cadaverine	Agarose	total	P.I	Observation time	Cadaverine	Agarose	total	P.I	Observation time	Cadaverine	Agarose	total	P.I	Observation time	Cadaverine	Agarose	total	P.I	Observation time	Cadaverine	Agarose	total	P.I	Observation time	Cadaverine	Agarose	total	P.I	Observation time	Cadaverine	Agarose	total	P.I
	number of eggs					number of eggs					number of eggs					number of eggs					number of eggs					number of eggs					number of eggs					number of eggs
14:00:00	0	0	0	0	14:00:00	0	0	0	0	14:00:00	0	0	0	0	14:00:00	0	0	0	0	14:00:00	0	0	0	0	14:00:00	0	0	0	0	14:00:00	0	0	0	0	14:00:00	0	0	0	0
14:30:00	1	1	2	0	14:30:00	2	3	5	-0.2	14:30:00	2	3	5	-0.2	14:30:00	3	3	6	0	14:30:00	1	3	4	-0.5	14:30:00	1	2	3	-0.333333	14:30:00	1	1	2	0	14:30:00	1	3	4	-0.5
15:00:00	4	1	5	0.6	15:00:00	4	3	7	0.142857	15:00:00	2	3	5	-0.2	15:00:00	3	3	6	0	15:00:00	1	3	4	-0.5	15:00:00	1	2	3	-0.333333	15:00:00	3	4	7	-0.142857	15:00:00	2	4	6	-0.333333
15:30:00	5	2	7	0.428571	15:30:00	4	5	9	-0.111111	15:30:00	2	5	7	-0.428571	15:30:00	5	7	12	-0.166667	15:30:00	3	4	7	-0.142857	15:30:00	3	3	6	0	15:30:00	3	4	7	-0.142857	15:30:00	4	4	8	0
16:00:00	5	3	8	0.25	16:00:00	4	5	9	-0.111111	16:00:00	3	6	9	-0.333333	16:00:00	5	7	12	-0.166667	16:00:00	4	4	8	0	16:00:00	4	4	8	0	16:00:00	4	4	8	0	16:00:00	3	4	7	-0.142857
16:30:00	7	6	13	0.0769231	16:30:00	7	6	13	0.0769231	16:30:00	4	6	10	-0.2	16:30:00	9	8	17	0.0588235	16:30:00	4	5	9	-0.111111	16:30:00	4	4	8	0	16:30:00	4	5	9	-0.111111	16:30:00	6	6	12	0
17:00:00	9	6	15	0.2	17:00:00	8	7	15	0.0666667	17:00:00	7	6	13	0.0769231	17:00:00	11	8	19	0.157895	17:00:00	4	5	9	-0.111111	17:00:00	5	6	11	-0.0909091	17:00:00	6	5	11	0.0909091	17:00:00	6	6	12	0
Gr66a-Gal4
Position
Observation time	Putrescine	Agarose	total	P.I	Observation time	Putrescine	Agarose	total	P.I	Observation time	Putrescine	Agarose	total	P.I	Observation time	Putrescine	Agarose	total	P.I	Observation time	Putrescine	Agarose	total	P.I	Observation time	Putrescine	Agarose	total	P.I	Observation time	Putrescine	Agarose	total	P.I	Observation time	Putrescine	Agarose	total	P.I
14:00:00	42	2	44	0.909091	14:00:00	51	5	56	0.821429	14:00:00	55	4	59	0.864407	14:00:00	51	4	55	0.854545	14:00:00	48	4	52	0.846154	14:00:00	46	2	48	0.916667	14:00:00	49	5	54	0.814815	14:00:00	49	4	53	0.849057
14:30:00	37	5	42	0.761905	14:30:00	27	4	31	0.741935	14:30:00	42	5	47	0.787234	14:30:00	43	5	48	0.791667	14:30:00	41	2	43	0.906977	14:30:00	32	2	34	0.882353	14:30:00	41	6	47	0.744681	14:30:00	37	7	44	0.681818
15:00:00	39	6	45	0.733333	15:00:00	36	9	45	0.6	15:00:00	37	5	42	0.761905	15:00:00	39	7	46	0.695652	15:00:00	37	7	44	0.681818	15:00:00	37	6	43	0.72093	15:00:00	38	9	47	0.617021	15:00:00	39	16	55	0.418182
15:30:00	31	8	39	0.589744	15:30:00	34	11	45	0.511111	15:30:00	31	7	38	0.631579	15:30:00	30	9	39	0.538462	15:30:00	29	13	42	0.380952	15:30:00	31	6	37	0.675676	15:30:00	31	12	43	0.44186	15:30:00	31	14	45	0.377778
16:00:00	29	9	38	0.526316	16:00:00	23	11	34	0.352941	16:00:00	27	9	36	0.5	16:00:00	24	9	33	0.454545	16:00:00	21	12	33	0.272727	16:00:00	29	9	38	0.526316	16:00:00	22	17	39	0.128205	16:00:00	25	19	44	0.136364
16:30:00	24	11	35	0.371429	16:30:00	24	13	37	0.297297	16:30:00	21	12	33	0.272727	16:30:00	18	12	30	0.2	16:30:00	18	14	32	0.125	16:30:00	26	11	37	0.405405	16:30:00	24	19	43	0.116279	16:30:00	23	13	36	0.277778
17:00:00	22	14	36	0.222222	17:00:00	19	14	33	0.151515	17:00:00	19	14	33	0.151515	17:00:00	15	19	34	-0.117647	17:00:00	20	16	36	0.111111	17:00:00	21	12	33	0.272727	17:00:00	20	15	35	0.142857	17:00:00	22	19	41	0.0731707
Observation time	Cadaverine	Agarose	total	P.I	Observation time	Cadaverine	Agarose	total	P.I	Observation time	Cadaverine	Agarose	total	P.I	Observation time	Cadaverine	Agarose	total	P.I	Observation time	Cadaverine	Agarose	total	P.I	Observation time	Cadaverine	Agarose	total	P.I	Observation time	Cadaverine	Agarose	total	P.I	Observation time	Cadaverine	Agarose	total	P.I
14:00:00	43	1	44	0.954545	14:00:00	56	4	60	0.866667	14:00:00	41	2	43	0.906977	14:00:00	49	3	52	0.884615	14:00:00	49	2	51	0.921569	14:00:00	52	0	52	1	14:00:00	51	3	54	0.888889	14:00:00	38	6	44	0.727273
14:30:00	38	3	41	0.853659	14:30:00	52	5	57	0.824561	14:30:00	38	5	43	0.767442	14:30:00	37	7	44	0.681818	14:30:00	38	4	42	0.809524	14:30:00	46	6	52	0.769231	14:30:00	47	8	55	0.709091	14:30:00	29	11	40	0.45
15:00:00	32	9	41	0.560976	15:00:00	47	9	56	0.678571	15:00:00	39	9	48	0.625	15:00:00	31	9	40	0.55	15:00:00	33	7	40	0.65	15:00:00	41	9	50	0.64	15:00:00	38	11	49	0.55102	15:00:00	30	8	38	0.578947
15:30:00	27	10	37	0.459459	15:30:00	39	10	49	0.591837	15:30:00	27	11	38	0.421053	15:30:00	24	11	35	0.371429	15:30:00	26	11	37	0.405405	15:30:00	26	11	37	0.405405	15:30:00	31	14	45	0.377778	15:30:00	22	12	34	0.294118
16:00:00	21	12	33	0.272727	16:00:00	31	11	42	0.47619	16:00:00	21	11	32	0.3125	16:00:00	19	12	31	0.225806	16:00:00	21	12	33	0.272727	16:00:00	22	16	38	0.157895	16:00:00	22	18	40	0.1	16:00:00	24	12	36	0.333333
16:30:00	28	13	41	0.365854	16:30:00	24	13	37	0.297297	16:30:00	20	13	33	0.212121	16:30:00	22	13	35	0.257143	16:30:00	19	12	31	0.225806	16:30:00	18	13	31	0.16129	16:30:00	26	16	42	0.238095	16:30:00	27	17	44	0.227273
17:00:00	25	13	38	0.315789	17:00:00	20	14	34	0.176471	17:00:00	18	15	33	0.0909091	17:00:00	26	14	40	0.3	17:00:00	15	14	29	0.0344828	17:00:00	23	17	40	0.15	17:00:00	20	17	37	0.0810811	17:00:00	21	12	33	0.272727
Oviposition
Observation time	Putrescine	Agarose	total	P.I	Observation time	Putrescine	Agarose	total	P.I	Observation time	Putrescine	Agarose	total	P.I	Observation time	Putrescine	Agarose	total	P.I	Observation time	Putrescine	Agarose	total	P.I	Observation time	Putrescine	Agarose	total	P.I	Observation time	Putrescine	Agarose	total	P.I	Observation time	Putrescine	Agarose	total	P.I
14:00:00	0	0	0	0	14:00:00	0	0	0	0	14:00:00	0	0	0	0	14:00:00	0	0	0	0	14:00:00	0	0	0	0	14:00:00	0	0	0	0	14:00:00	0	0	0	0	14:00:00	0	0	0	0
14:30:00	1	13	14	-0.857143	14:30:00	3	18	21	-0.714286	14:30:00	1	8	9	-0.777778	14:30:00	3	12	15	-0.6	14:30:00	1	23	24	-0.916667	14:30:00	1	51	52	-0.961538	14:30:00	1	23	24	-0.916667	14:30:00	1	29	30	-0.933333
15:00:00	2	39	41	-0.902439	15:00:00	3	25	28	-0.785714	15:00:00	2	29	31	-0.870968	15:00:00	3	24	27	-0.777778	15:00:00	2	29	31	-0.870968	15:00:00	3	47	50	-0.88	15:00:00	2	45	47	-0.914894	15:00:00	4	46	50	-0.84
15:30:00	2	52	54	-0.925926	15:30:00	5	49	54	-0.814815	15:30:00	7	42	49	-0.714286	15:30:00	3	48	51	-0.882353	15:30:00	5	47	52	-0.807692	15:30:00	5	68	73	-0.863014	15:30:00	4	67	71	-0.887324	15:30:00	4	67	71	-0.887324
16:00:00	5	78	83	-0.879518	16:00:00	12	71	83	-0.710843	16:00:00	11	74	85	-0.741176	16:00:00	12	76	88	-0.727273	16:00:00	9	78	87	-0.793103	16:00:00	8	87	95	-0.831579	16:00:00	6	87	93	-0.870968	16:00:00	6	78	84	-0.857143
16:30:00	6	102	108	-0.888889	16:30:00	13	98	111	-0.765766	16:30:00	11	112	123	-0.821138	16:30:00	13	109	122	-0.786885	16:30:00	12	101	113	-0.787611	16:30:00	12	94	106	-0.773585	16:30:00	7	91	98	-0.857143	16:30:00	8	99	107	-0.850467
17:00:00	6	117	123	-0.902439	17:00:00	13	104	117	-0.777778	17:00:00	11	118	129	-0.829457	17:00:00	13	114	127	-0.795276	17:00:00	13	112	125	-0.792	17:00:00	14	109	123	-0.772358	17:00:00	8	113	121	-0.867769	17:00:00	11	106	117	-0.811966
Observation time	Cadaverine	Agarose	total	P.I	Observation time	Cadaverine	Agarose	total	P.I	Observation time	Cadaverine	Agarose	total	P.I	Observation time	Cadaverine	Agarose	total	P.I	Observation time	Cadaverine	Agarose	total	P.I	Observation time	Cadaverine	Agarose	total	P.I	Observation time	Cadaverine	Agarose	total	P.I	Observation time	Cadaverine	Agarose	total	P.I
14:00:00	0	0	0	0	14:00:00	0	0	0	0	14:00:00	0	0	0	0	14:00:00	1	0	1	0	14:00:00	0	0	0	0	14:00:00	0	0	0	0	14:00:00	0	0	0	0	14:00:00	0	0	0	0
14:30:00	1	24	25	-0.92	14:30:00	1	13	14	-0.857143	14:30:00	2	14	16	-0.75	14:30:00	1	22	23	-0.913043	14:30:00	1	17	18	-0.888889	14:30:00	1	21	22	-0.909091	14:30:00	4	27	31	-0.741935	14:30:00	6	26	32	-0.625
15:00:00	1	49	50	-0.96	15:00:00	4	31	35	-0.771429	15:00:00	3	29	32	-0.8125	15:00:00	3	37	40	-0.85	15:00:00	2	38	40	-0.9	15:00:00	3	34	37	-0.837838	15:00:00	7	39	46	-0.695652	15:00:00	9	45	54	-0.666667
15:30:00	2	56	58	-0.931034	15:30:00	5	66	71	-0.859155	15:30:00	7	46	53	-0.735849	15:30:00	7	65	72	-0.805556	15:30:00	2	66	68	-0.941176	15:30:00	5	65	70	-0.857143	15:30:00	9	54	63	-0.714286	15:30:00	12	69	81	-0.703704
16:00:00	6	69	75	-0.84	16:00:00	7	88	95	-0.852632	16:00:00	7	69	76	-0.815789	16:00:00	9	78	87	-0.793103	16:00:00	4	79	83	-0.903614	16:00:00	9	78	87	-0.793103	16:00:00	11	68	79	-0.721519	16:00:00	14	83	97	-0.71134
16:30:00	6	79	85	-0.858824	16:30:00	9	94	103	-0.825243	16:30:00	11	78	89	-0.752809	16:30:00	11	88	99	-0.777778	16:30:00	5	91	96	-0.895833	16:30:00	12	94	106	-0.773585	16:30:00	12	89	101	-0.762376	16:30:00	15	109	124	-0.758065
17:00:00	9	111	120	-0.85	17:00:00	10	111	121	-0.834711	17:00:00	12	121	133	-0.819549	17:00:00	11	103	114	-0.807018	17:00:00	7	101	108	-0.87037	17:00:00	14	119	133	-0.789474	17:00:00	12	82	94	-0.744681	17:00:00	16	113	129	-0.751938
Gr66a-Gal4>Kir2.1
Position
Observation time	Putrescine	Agarose	total	P.I	Observation time	Putrescine	Agarose	total	P.I	Observation time	Putrescine	Agarose	total	P.I	Observation time	Putrescine	Agarose	total	P.I	Observation time	Putrescine	Agarose	total	P.I	Observation time	Putrescine	Agarose	total	P.I	Observation time	Putrescine	Agarose	total	P.I	Observation time	Putrescine	Agarose	total	P.I
14:00:00	46	9	55	0.672727	14:00:00	46	6	52	0.769231	14:00:00	48	6	54	0.777778	14:00:00	48	1	49	0.959184	14:00:00	42	6	48	0.75	14:00:00	52	1	53	0.962264	14:00:00	31	5	36	0.722222	14:00:00	34	5	39	0.74359
14:30:00	31	8	39	0.589744	14:30:00	42	5	47	0.787234	14:30:00	39	9	48	0.625	14:30:00	40	5	45	0.777778	14:30:00	36	9	45	0.6	14:30:00	47	3	50	0.88	14:30:00	34	8	42	0.619048	14:30:00	39	8	47	0.659574
15:00:00	39	12	51	0.529412	15:00:00	29	7	36	0.611111	15:00:00	33	15	48	0.375	15:00:00	37	9	46	0.608696	15:00:00	32	12	44	0.454545	15:00:00	39	5	44	0.772727	15:00:00	41	10	51	0.607843	15:00:00	42	10	52	0.615385
15:30:00	22	8	30	0.466667	15:30:00	24	11	35	0.371429	15:30:00	29	17	46	0.26087	15:30:00	33	13	46	0.434783	15:30:00	28	14	42	0.333333	15:30:00	47	9	56	0.678571	15:30:00	27	13	40	0.35	15:30:00	28	13	41	0.365854
16:00:00	33	13	46	0.434783	16:00:00	22	13	35	0.257143	16:00:00	21	12	33	0.272727	16:00:00	23	19	42	0.0952381	16:00:00	26	11	37	0.405405	16:00:00	31	12	43	0.44186	16:00:00	25	16	41	0.219512	16:00:00	26	16	42	0.238095
16:30:00	28	12	40	0.4	16:30:00	24	16	40	0.2	16:30:00	18	4	22	0.636364	16:30:00	19	13	32	0.1875	16:30:00	18	9	27	0.333333	16:30:00	33	16	49	0.346939	16:30:00	19	13	32	0.1875	16:30:00	18	12	30	0.2
17:00:00	22	11	33	0.333333	17:00:00	25	19	44	0.136364	17:00:00	16	8	24	0.333333	17:00:00	16	17	33	-0.030303	17:00:00	22	14	36	0.222222	17:00:00	27	14	41	0.317073	17:00:00	21	15	36	0.166667	17:00:00	19	15	34	0.117647
Observation time	Cadaverine	Agarose	total	P.I	Observation time	Cadaverine	Agarose	total	P.I	Observation time	Cadaverine	Agarose	total	P.I	Observation time	Cadaverine	Agarose	total	P.I	Observation time	Cadaverine	Agarose	total	P.I	Observation time	Cadaverine	Agarose	total	P.I	Observation time	Cadaverine	Agarose	total	P.I	Observation time	Cadaverine	Agarose	total	P.I
14:00:00	38	5	43	0.767442	14:00:00	50	5	55	0.818182	14:00:00	49	7	56	0.75	14:00:00	49	3	52	0.884615	14:00:00	39	3	42	0.857143	14:00:00	47	2	49	0.918367	14:00:00	31	5	36	0.722222	14:00:00	46	7	53	0.735849
14:30:00	40	7	47	0.702128	14:30:00	44	8	52	0.692308	14:30:00	33	11	44	0.5	14:30:00	37	7	44	0.681818	14:30:00	31	7	38	0.631579	14:30:00	38	5	43	0.767442	14:30:00	34	8	42	0.619048	14:30:00	35	11	46	0.521739
15:00:00	33	12	45	0.466667	15:00:00	41	11	52	0.576923	15:00:00	38	9	47	0.617021	15:00:00	31	9	40	0.55	15:00:00	40	10	50	0.6	15:00:00	31	8	39	0.589744	15:00:00	41	10	51	0.607843	15:00:00	29	13	42	0.380952
15:30:00	26	18	44	0.181818	15:30:00	39	8	47	0.659574	15:30:00	26	14	40	0.3	15:30:00	24	11	35	0.371429	15:30:00	28	13	41	0.365854	15:30:00	29	11	40	0.45	15:30:00	27	13	40	0.35	15:30:00	32	16	48	0.333333
16:00:00	22	17	39	0.128205	16:00:00	27	16	43	0.255814	16:00:00	21	6	27	0.555556	16:00:00	19	12	31	0.225806	16:00:00	23	12	35	0.314286	16:00:00	27	9	36	0.5	16:00:00	25	16	41	0.219512	16:00:00	24	19	43	0.116279
16:30:00	21	11	32	0.3125	16:30:00	25	22	47	0.0638298	16:30:00	25	18	43	0.162791	16:30:00	22	13	35	0.257143	16:30:00	19	11	30	0.266667	16:30:00	22	14	36	0.222222	16:30:00	19	14	33	0.151515	16:30:00	19	22	41	-0.0731707
17:00:00	13	6	19	0.368421	17:00:00	22	16	38	0.157895	17:00:00	23	14	37	0.243243	17:00:00	25	14	39	0.282051	17:00:00	14	9	23	0.217391	17:00:00	25	16	41	0.219512	17:00:00	21	15	36	0.166667	17:00:00	22	24	46	-0.0434783
Oviposition
Observation time	Putrescine	Agarose	total	P.I	Observation time	Putrescine	Agarose	total	P.I	Observation time	Putrescine	Agarose	total	P.I	Observation time	Putrescine	Agarose	total	P.I	Observation time	Putrescine	Agarose	total	P.I	Observation time	Putrescine	Agarose	total	P.I	Observation time	Putrescine	Agarose	total	P.I	Observation time	Putrescine	Agarose	total	P.I
	number of eggs					number of eggs					number of eggs					number of eggs					number of eggs					number of eggs					number of eggs					number of eggs
14:00:00	0	0	0	0	14:00:00	0	0	0	0	14:00:00	0	0	0	0	14:00:00	0	0	0	0	14:00:00	0	0	0	0	14:00:00	0	0	0	0	14:00:00	0	0	0	0	14:00:00	0	0	0	0
14:30:00	7	3	10	0.4	14:30:00	13	3	16	0.625	14:30:00	6	3	9	0.333333	14:30:00	9	2	11	0.636364	14:30:00	20	4	24	0.666667	14:30:00	28	3	31	0.806452	14:30:00	14	2	16	0.75	14:30:00	13	5	18	0.444444
15:00:00	12	7	19	0.263158	15:00:00	15	5	20	0.5	15:00:00	24	7	31	0.548387	15:00:00	19	5	24	0.583333	15:00:00	28	6	34	0.647059	15:00:00	35	7	42	0.666667	15:00:00	36	8	44	0.636364	15:00:00	37	12	49	0.510204
15:30:00	22	9	31	0.419355	15:30:00	38	13	51	0.490196	15:30:00	43	13	56	0.535714	15:30:00	41	18	59	0.389831	15:30:00	37	12	49	0.510204	15:30:00	47	11	58	0.62069	15:30:00	55	13	68	0.617647	15:30:00	51	18	69	0.478261
16:00:00	45	15	60	0.5	16:00:00	45	19	64	0.40625	16:00:00	65	19	84	0.547619	16:00:00	47	13	60	0.566667	16:00:00	55	17	72	0.527778	16:00:00	68	19	87	0.563218	16:00:00	69	18	87	0.586207	16:00:00	64	21	85	0.505882
16:30:00	68	22	90	0.511111	16:30:00	63	28	91	0.384615	16:30:00	81	23	104	0.557692	16:30:00	58	15	73	0.589041	16:30:00	64	23	87	0.471264	16:30:00	79	24	103	0.533981	16:30:00	84	22	106	0.584906	16:30:00	73	24	97	0.505155
17:00:00	86	31	117	0.470085	17:00:00	72	36	108	0.333333	17:00:00	89	29	118	0.508475	17:00:00	64	17	81	0.580247	17:00:00	72	35	107	0.345794	17:00:00	94	29	123	0.528455	17:00:00	91	25	116	0.568966	17:00:00	79	27	106	0.490566
Observation time	Cadaverine	Agarose	total	P.I	Observation time	Cadaverine	Agarose	total	P.I	Observation time	Cadaverine	Agarose	total	P.I	Observation time	Cadaverine	Agarose	total	P.I	Observation time	Cadaverine	Agarose	total	P.I	Observation time	Cadaverine	Agarose	total	P.I	Observation time	Cadaverine	Agarose	total	P.I	Observation time	Cadaverine	Agarose	total	P.I
	number of eggs					number of eggs					number of eggs					number of eggs					number of eggs					number of eggs					number of eggs					number of eggs
14:00:00	0	0	0	0	14:00:00	0	0	0	0	14:00:00	0	0	0	0	14:00:00	0	0	0	0	14:00:00	0	0	0	0	14:00:00	0	0	0	0	14:00:00	0	0	0	0	14:00:00	0	0	0	0
14:30:00	18	1	19	0.894737	14:30:00	15	3	18	0.666667	14:30:00	13	3	16	0.625	14:30:00	7	2	9	0.555556	14:30:00	12	4	16	0.5	14:30:00	14	2	16	0.75	14:30:00	16	7	23	0.391304	14:30:00	27	4	31	0.741935
15:00:00	37	9	46	0.608696	15:00:00	26	7	33	0.575758	15:00:00	24	7	31	0.548387	15:00:00	13	7	20	0.3	15:00:00	28	7	35	0.6	15:00:00	23	7	30	0.533333	15:00:00	42	13	55	0.527273	15:00:00	39	9	48	0.625
15:30:00	45	14	59	0.525424	15:30:00	37	12	49	0.510204	15:30:00	36	13	49	0.469388	15:30:00	28	11	39	0.435897	15:30:00	45	11	56	0.607143	15:30:00	35	11	46	0.521739	15:30:00	65	18	83	0.566265	15:30:00	54	13	67	0.61194
16:00:00	68	24	92	0.478261	16:00:00	49	16	65	0.507692	16:00:00	59	9	68	0.735294	16:00:00	41	16	57	0.438596	16:00:00	69	14	83	0.662651	16:00:00	58	21	79	0.468354	16:00:00	79	23	102	0.54902	16:00:00	68	18	86	0.581395
16:30:00	84	35	119	0.411765	16:30:00	67	19	86	0.55814	16:30:00	77	23	100	0.54	16:30:00	60	23	83	0.445783	16:30:00	82	18	100	0.64	16:30:00	77	33	110	0.4	16:30:00	85	30	115	0.478261	16:30:00	89	24	113	0.575221
17:00:00	108	21	129	0.674419	17:00:00	71	23	94	0.510638	17:00:00	86	36	122	0.409836	17:00:00	98	28	126	0.555556	17:00:00	94	21	115	0.634783	17:00:00	109	38	147	0.482993	17:00:00	96	37	133	0.443609	17:00:00	82	29	111	0.477477
GR66a/IR76b > Kir2.1
Position
Observation time	Putrescine	Agarose	total	P.I	Observation time	Putrescine	Agarose	total	P.I	Observation time	Putrescine	Agarose	total	P.I	Observation time	Putrescine	Agarose	total	P.I	Observation time	Putrescine	Agarose	total	P.I	Observation time	Putrescine	Agarose	total	P.I	Observation time	Putrescine	Agarose	total	P.I	Observation time	Putrescine	Agarose	total	P.I
14:00:00	23	26	49	-0.0612245	14:00:00	22	26	48	-0.0833333	14:00:00	26	25	51	0.0196078	14:00:00	27	21	48	0.125	14:00:00	28	33	61	-0.0819672	14:00:00	26	24	50	0.04	14:00:00	27	23	50	0.08	14:00:00	17	20	37	-0.0810811
14:30:00	33	23	56	0.178571	14:30:00	23	32	55	-0.163636	14:30:00	27	32	59	-0.0847458	14:30:00	21	25	46	-0.0869565	14:30:00	22	23	45	-0.0222222	14:30:00	31	31	62	0	14:30:00	32	28	60	0.0666667	14:30:00	21	25	46	-0.0869565
15:00:00	24	26	50	-0.04	15:00:00	22	30	52	-0.153846	15:00:00	36	22	58	0.241379	15:00:00	24	26	50	-0.04	15:00:00	23	31	54	-0.148148	15:00:00	23	35	58	-0.206897	15:00:00	22	25	47	-0.0638298	15:00:00	29	26	55	0.0545455
1900-01-27	36	23	59	0.220339	15:30:00	19	23	42	-0.0952381	15:30:00	27	34	61	-0.114754	15:30:00	22	28	50	-0.12	15:30:00	24	32	56	-0.142857	15:30:00	26	28	54	-0.037037	15:30:00	21	22	43	-0.0232558	15:30:00	23	27	50	-0.08
16:00:00	23	24	47	-0.0212766	16:00:00	27	12	39	0.384615	16:00:00	25	31	56	-0.107143	16:00:00	27	19	46	0.173913	16:00:00	21	26	47	-0.106383	16:00:00	29	26	55	0.0545455	16:00:00	24	27	51	-0.0588235	16:00:00	27	21	48	0.125
16:30:00	27	22	49	0.102041	16:30:00	21	19	40	0.05	16:30:00	21	25	46	-0.0869565	16:30:00	23	23	46	0	16:30:00	25	27	52	-0.0384615	16:30:00	31	29	60	0.0333333	16:30:00	33	28	61	0.0819672	16:30:00	25	27	52	-0.0384615
17:00:00	22	19	41	0.0731707	17:00:00	33	31	64	0.03125	17:00:00	23	26	49	-0.0612245	17:00:00	26	27	53	-0.0188679	17:00:00	17	21	38	-0.105263	17:00:00	27	31	58	-0.0689655	17:00:00	27	29	56	-0.0357143	17:00:00	24	24	48	0
Observation time	Cadaverine	Agarose	total	P.I	Observation time	Cadaverine	Agarose	total	P.I	Observation time	Cadaverine	Agarose	total	P.I	Observation time	Cadaverine	Agarose	total	P.I	Observation time	Cadaverine	Agarose	total	P.I	Observation time	Cadaverine	Agarose	total	P.I	Observation time	Cadaverine	Agarose	total	P.I	Observation time	Cadaverine	Agarose	total	P.I
	number of Flies					number of Flies					number of Flies					number of Flies					number of Flies					number of Flies					number of Flies					number of Flies
14:00:00	25	19	44	0.136364	14:00:00	24	23	47	0.0212766	14:00:00	23	22	45	0.0222222	14:00:00	26	24	50	0.04	14:00:00	20	24	44	-0.0909091	14:00:00	27	29	56	-0.0357143	14:00:00	25	28	53	-0.0566038	14:00:00	33	24	57	0.157895
14:30:00	23	22	45	0.0222222	14:30:00	23	21	44	0.0454545	14:30:00	25	19	44	0.136364	14:30:00	23	22	45	0.0222222	14:30:00	21	21	42	0	14:30:00	21	27	48	-0.125	14:30:00	29	33	62	-0.0645161	14:30:00	37	21	58	0.275862
15:00:00	22	32	54	-0.185185	15:00:00	22	20	42	0.047619	15:00:00	24	21	45	0.0666667	15:00:00	31	26	57	0.0877193	15:00:00	24	28	52	-0.0769231	15:00:00	24	13	37	0.297297	15:00:00	22	32	54	-0.185185	15:00:00	26	28	54	-0.037037
15:30:00	32	24	56	0.142857	15:30:00	26	18	44	0.181818	15:30:00	27	22	49	0.102041	15:30:00	31	27	58	0.0689655	15:30:00	22	33	55	-0.2	15:30:00	25	27	52	-0.0384615	15:30:00	27	37	64	-0.15625	15:30:00	28	27	55	0.0181818
16:00:00	25	21	46	0.0869565	16:00:00	26	23	49	0.0612245	16:00:00	28	23	51	0.0980392	16:00:00	34	28	62	0.0967742	16:00:00	26	24	50	0.04	16:00:00	22	24	46	-0.0434783	16:00:00	28	26	54	0.037037	16:00:00	22	25	47	-0.0638298
16:30:00	21	22	43	-0.0232558	16:30:00	33	28	61	0.0819672	16:30:00	27	21	48	0.125	16:30:00	25	21	46	0.0869565	16:30:00	19	26	45	-0.155556	16:30:00	26	28	54	-0.037037	16:30:00	19	30	49	-0.22449	16:30:00	26	23	49	0.0612245
17:00:00	26	18	44	0.181818	17:00:00	35	29	64	0.09375	17:00:00	24	18	42	0.142857	17:00:00	27	20	47	0.148936	17:00:00	21	29	50	-0.16	17:00:00	23	25	48	-0.0416667	17:00:00	26	24	50	0.04	17:00:00	22	26	48	-0.0833333
Oviposition
Observation time	Putrescine	Agarose	total	P.I	Observation time	Putrescine	Agarose	total	P.I	Observation time	Putrescine	Agarose	total	P.I	Observation time	Putrescine	Agarose	total	P.I	Observation time	Putrescine	Agarose	total	P.I	Observation time	Putrescine	Agarose	total	P.I	Observation time	Putrescine	Agarose	total	P.I	Observation time	Putrescine	Agarose	total	P.I
	number of eggs					number of eggs					number of eggs					number of eggs					number of eggs					number of eggs					number of eggs					number of eggs
14:00:00	0	0	0	0	14:00:00	0	0	0	0	14:00:00	0	0	0	0	14:00:00	0	0	0	0	14:00:00	0	0	0	0	14:00:00	0	0	0	0	14:00:00	0	0	0	0	14:00:00	0	0	0	0
14:30:00	1	0	1	1	14:30:00	1	0	1	1	14:30:00	1	2	3	-0.333333	14:30:00	1	3	4	-0.5	14:30:00	2	3	5	-0.2	14:30:00	1	2	3	-0.333333	14:30:00	1	3	4	-0.5	14:30:00	3	2	5	0.2
15:00:00	2	1	3	0.333333	15:00:00	3	3	6	0	15:00:00	2	5	7	-0.428571	15:00:00	2	5	7	-0.428571	15:00:00	2	3	5	-0.2	15:00:00	1	3	4	-0.5	15:00:00	2	3	5	-0.2	15:00:00	5	3	8	0.25
15:30:00	2	1	3	0.333333	15:30:00	3	3	6	0	15:30:00	3	7	10	-0.4	15:30:00	3	5	8	-0.25	15:30:00	3	4	7	-0.142857	15:30:00	2	3	5	-0.2	15:30:00	5	6	11	-0.0909091	15:30:00	7	8	15	-0.0666667
16:00:00	2	3	5	-0.2	16:00:00	7	4	11	0.272727	16:00:00	12	7	19	0.263158	16:00:00	4	7	11	-0.272727	16:00:00	3	6	9	-0.333333	16:00:00	4	4	8	0	16:00:00	9	8	17	0.0588235	16:00:00	9	11	20	-0.1
16:30:00	3	4	7	-0.142857	16:30:00	7	8	15	-0.0666667	16:30:00	12	11	23	0.0434783	16:30:00	5	7	12	-0.166667	16:30:00	6	6	12	0	16:30:00	5	4	9	0.111111	16:30:00	10	11	21	-0.047619	16:30:00	13	12	25	0.04
17:00:00	3	4	7	-0.142857	17:00:00	11	10	21	0.047619	17:00:00	13	12	25	0.04	17:00:00	6	7	13	-0.0769231	17:00:00	6	7	13	-0.0769231	17:00:00	6	5	11	0.0909091	17:00:00	12	11	23	0.0434783	17:00:00	14	15	29	-0.0344828
Observation time	Cadaverine	Agarose	total	P.I	Observation time	Cadaverine	Agarose	total	P.I	Observation time	Cadaverine	Agarose	total	P.I	Observation time	Cadaverine	Agarose	total	P.I	Observation time	Cadaverine	Agarose	total	P.I	Observation time	Cadaverine	Agarose	total	P.I	Observation time	Cadaverine	Agarose	total	P.I	Observation time	Cadaverine	Agarose	total	P.I
	number of eggs					number of eggs					number of eggs					number of eggs					number of eggs					number of eggs					number of eggs					number of eggs
14:00:00	0	0	0	0	14:00:00	0	0	0	0	14:00:00	0	0	0	0	14:00:00	0	0	0	0	14:00:00	0	0	0	0	14:00:00	0	0	0	0	14:00:00	0	0	0	0	14:00:00	0	0	0	0
14:30:00	2	2	4	0	14:30:00	2	1	3	0.333333	14:30:00	1	1	2	0	14:30:00	4	3	7	0.142857	14:30:00	3	5	8	-0.25	14:30:00	1	2	3	-0.333333	14:30:00	4	3	7	0.142857	14:30:00	3	5	8	-0.25
15:00:00	2	4	6	-0.333333	15:00:00	3	1	4	0.5	15:00:00	3	4	7	-0.142857	15:00:00	4	3	7	0.142857	15:00:00	5	5	10	0	15:00:00	2	4	6	-0.333333	15:00:00	5	6	11	-0.0909091	15:00:00	5	7	12	-0.166667
15:30:00	3	5	8	-0.25	15:30:00	4	3	7	0.142857	15:30:00	3	4	7	-0.142857	15:30:00	4	4	8	0	15:30:00	5	6	11	-0.0909091	15:30:00	4	4	8	0	15:30:00	7	8	15	-0.0666667	15:30:00	7	9	16	-0.125
16:00:00	4	5	9	-0.111111	16:00:00	7	4	11	0.272727	16:00:00	6	5	11	0.0909091	16:00:00	13	6	19	0.368421	16:00:00	5	6	11	-0.0909091	16:00:00	7	7	14	0	16:00:00	8	10	18	-0.111111	16:00:00	9	12	21	-0.142857
16:30:00	4	8	12	-0.333333	16:30:00	10	11	21	-0.047619	16:30:00	6	8	14	-0.142857	16:30:00	13	6	19	0.368421	16:30:00	7	9	16	-0.125	16:30:00	7	9	16	-0.125	16:30:00	12	13	25	-0.04	16:30:00	11	14	25	-0.12
17:00:00	5	8	13	-0.230769	17:00:00	10	11	21	-0.047619	17:00:00	11	8	19	0.157895	17:00:00	13	7	20	0.3	17:00:00	7	9	16	-0.125	17:00:00	11	9	20	0.1	17:00:00	14	16	30	-0.0666667	17:00:00	13	14	27	-0.037037

## Sheet: Figure 6 Data
Figure6B									Figure6C
1 μm			10 μm			100 μm			1 μm			10 μm			100 μm
Cadaverine	Water	PI	Cadaverine 10 µM	Water	PI	Cadaverine 100 µM	Water	PI	Putrecine 1 µM	Water	PI	Putrecine 10 µM	Water	PI	Putrecine 100 µM	Water	PI
77	0	1	43	0	1	46	14	0.533333	36	29	0.107692	27	25	0.0384615	32	29	0.0491803
0	78	-1	0	20	-1	70	0	1	5	89	-0.893617	72	0	1	60	35	0.263158
41	42	-0.0120482	20	29	-0.183673	7	56	-0.777778	33	53	-0.232558	0	52	-1	5	73	-0.871795
34	0	1	54	0	1	78	0	1	66	1	0.970149	1	50	-0.960784	34	52	-0.209302
0	77	-1	8	45	-0.698113	10	60	-0.714286	39	14	0.471698	22	40	-0.290323	20	55	-0.466667
58	46	0.115385	0	37	-1	18	64	-0.560976	74	11	0.741176	58	0	1	9	37	-0.608696
20	53	-0.452055	21	0	1	0	58	-1	64	0	1	54	0	1	12	49	-0.606557
0	20	-1	54	2	0.928571	72	0	1	72	27	0.454545	9	62	-0.746479	35	55	-0.222222
66	0	1	57	0	1	0	75	-1	53	0	1	4	48	-0.846154	39	22	0.278689
70	12	0.707317	54	3	0.894737	4	35	-0.794872	79	0	1	0	61	-1	75	0	1
8	63	-0.774648	59	0	1	0	65	-1	13	1	0.857143	51	0	1	19	0	1
20	50	-0.428571	18	34	-0.307692	71	10	0.753086	50	50	0	55	5	0.833333	0	47	-1
68	0	1	13	50	-0.587302	59	0	1	75	19	0.595745	59	0	1	51	0	1
84	0	1	34	11	0.511111	0	52	-1	16	42	-0.448276	23	25	-0.0416667	38	42	-0.05
37	16	0.396226	16	40	-0.428571	60	15	0.6	78	0	1	31	39	-0.114286	35	25	0.166667
1	51	-0.961538	74	0	1	0	55	-1	83	13	0.729167	35	10	0.555556	4	56	-0.866667
35	43	-0.102564	8	59	-0.761194	19	58	-0.506494	24	70	-0.489362	27	37	-0.15625	74	2	0.947368
29	1	0.933333	28	23	0.0980392	0	63	-1	15	39	-0.444444	1	67	-0.970588	60	13	0.643836
29	0	1	66	0	1	70	0	1	27	38	-0.169231	56	9	0.723077	7	62	-0.797101
101	0	1	52	12	0.625	0	76	-1	65	9	0.756757	1	72	-0.972603	71	1	0.972222
20	4	0.666667	63	0	1	0	90	-1	0	75	-1	25	2	0.851852	5	64	-0.855072
14	58	-0.611111	40	41	-0.0123457	12	56	-0.647059	57	34	0.252747	59	0	1	0	52	-1
53	1	0.962963	28	13	0.365854	47	26	0.287671	38	58	-0.208333	53	1	0.962963	0	25	-1
44	22	0.333333	2	68	-0.942857	0	98	-1	15	15	0	72	19	0.582418	1	66	-0.970149
32	22	0.185185	58	17	0.546667	33	10	0.534884	55	40	0.157895	56	0	1	0	86	-1
83	0	1	48	17	0.476923	1	62	-0.968254	10	84	-0.787234	65	0	1	39	1	0.95
65	0	1	15	18	-0.0909091	6	72	-0.846154	0	60	-1	52	14	0.575758	13	0	1
63	3	0.909091	0	89	-1	66	22	0.5	25	40	-0.230769	76	6	0.853659	34	43	-0.116883
3	62	-0.907692	56	5	0.836066	0	49	-1	68	0	1	87	14	0.722772	6	72	-0.846154
50	20	0.428571	87	0	1	0	70	-1	7	48	-0.745455	50	19	0.449275	47	24	0.323944
90	6	0.875	91	0	1	4	54	-0.862069	81	0	1	75	0	1	56	12	0.647059
63	0	1	49	49	0	4	54	-0.862069	0	49	-1	5	69	-0.864865	0	87	-1
			0	82	-1	45	53	-0.0816327	96	1	0.979381	12	9	0.142857	2	20	-0.818182
			94	17	0.693694	51	30	0.259259	70	18	0.590909	66	3	0.913043	16	78	-0.659574
			2	56	-0.931034	5	63	-0.852941				63	4	0.880597
						95	0	1				32	2	0.882353
						83	0	1
						28		1
42.4375	23.4375		37.4857	23.9143		28	42.2973		43.7941	30.2059		39.8333	21.2222		26.4412	37.7941
29.4048	26.3242		28.0843	25.4574		31.01	29.0468		29.222	26.7387		26.4548	24.204		24.2189	27.2883
32	32		35	35		38	38		34	34		36	36		34	34
5.19808	4.65351		4.74711	4.30309		5.03049	4.71201		5.01153	4.58564		4.40914	4.034		4.15351	4.67991

## Sheet: Figure S1 Data
Figure S1A
Odors	male	female	total	PI	Odors	male	female	total	PI	Odors	male	female	total	PI	Odors	male	female	total	PI	Odors	male	female	total	PI	Odors	male	female	total	PI	Odors	male	female	total	PI
0.001mM					0.01mM					0.1mM					1mM					10mM					100mM					1000mM
PUT	19	14	33	0.157895	PUT	18	16	34	0.214286	PUT	16	24	40	0.355932	PUT	21	11	32	0.560976	PUT	18	21	39	0.444444	PUT	23	12	35	0.22807	PUT	12	23	35	0.09375
H2O	0	24	24		H2O	7	15	22		H2O	7	12	19		H2O	6	3	9		H2O	6	9	15		H2O	3	19	22		H2O	10	19	29
PUT	18	15	33	0.03125	PUT	18	23	41	0.223881	PUT	15	20	35	0.296296	PUT	13	25	38	0.583333	PUT	31	13	44	0.353846	PUT	22	10	32	0.230769	PUT	29	16	45	0.168831
H2O	17	14	31		H2O	7	19	26		H2O	13	6	19		H2O	3	7	10		H2O	13	8	21		H2O	14	6	20		H2O	18	14	32
PUT	19	13	32	0.0847458	PUT	12	22	34	0.192982	PUT	13	19	32	0.333333	PUT	18	13	31	0.589744	PUT	22	14	36	0.411765	PUT	17	19	36	0.285714	PUT	6	18	24	0.170732
H2O	11	16	27		H2O	16	7	23		H2O	4	12	16		H2O	3	5	8		H2O	7	8	15		H2O	6	14	20		H2O	9	8	17
PUT	16	14	30	-0.0909091	PUT	20	14	34	0.152542	PUT	14	26	40	0.311475	PUT	14	22	36	0.44	PUT	21	13	34	0.446809	PUT	15	9	24	0.333333	PUT	15	18	33	0.0819672
H2O	17	19	36		H2O	16	9	25		H2O	8	13	21		H2O	5	9	14		H2O	3	10	13		H2O	5	7	12		H2O	12	16	28
PUT average PI:				0.0457454	PUT average PI:				0.195923	PUT average PI:				0.324259	PUT average PI:				0.543513	PUT average PI:				0.414216	PUT average PI:				0.269472	PUT average PI:				0.12882
SD				0.104854	SD				0.031672	SD				0.0260184	SD				0.0701019	SD				0.0433073	SD				0.05018	SD				0.0475485
n				8	n				8	n				8	n				8	n				8	n				8	n				8
SEM				0.0370715	SEM				0.0111977	SEM				0.00919889	SEM				0.0247847	SEM				0.0153114	SEM				0.0177413	SEM				0.0168109
Odors	male	female	total	PI	Odors	male	female	total	PI	Odors	male	female	total	PI	Odors	male	female	total	PI	Odors	male	female	total	PI	Odors	male	female	total	PI	Odors	male	female	total	PI
0.001mM					0.01mM					0.1mM					1mM					10mM					100mM					1000mM
CAD	21	17	38	0.0410959	CAD	20	12	32	0.103448	CAD	17	20	37	0.275862	CAD	22	16	38	0.52	CAD	19	21	40	0.403509	CAD	8	23	31	0.192308	CAD	20	15	35	0.0606061
H2O	16	19	35		H2O	9	17	26		H2O	13	8	21		H2O	5	7	12		H2O	11	6	17		H2O	6	15	21		H2O	12	19	31
CAD	18	15	33	-0.0704225	CAD	14	18	32	0.103448	CAD	19	16	35	0.296296	CAD	17	22	39	0.56	CAD	18	25	43	0.34375	CAD	14	18	32	0.103448	CAD	15	14	29	0.234043
H2O	22	16	38		H2O	17	9	26		H2O	5	14	19		H2O	3	8	11		H2O	14	7	21		H2O	15	11	26		H2O	6	12	18
CAD	15	18	33	0.118644	CAD	18	14	32	0.230769	CAD	22	17	39	0.21875	CAD	16	29	45	0.525424	CAD	26	23	49	0.4	CAD	19	22	41	0.188406	CAD	17	8	25	0.0638298
H2O	17	9	26		H2O	6	14	20		H2O	18	7	25		H2O	6	8	14		H2O	6	15	21		H2O	8	20	28		H2O	12	10	22
CAD	20	15	35	0.0606061	CAD	12	17	29	0.16	CAD	19	21	40	0.311475	CAD	20	17	37	0.510204	CAD	13	27	40	0.454545	CAD	15	17	32	0.230769	CAD	17	12	29	0.0357143
H2O	18	13	31		H2O	13	8	21		H2O	15	6	21		H2O	6	6	12		H2O	6	9	15		H2O	8	12	20		H2O	11	16	27
CAD average PI:				0.0374809	CAD average PI:				0.149416	CAD average PI:				0.275596	CAD average PI:				0.528907	CAD average PI:				0.400451	CAD average PI:				0.178733	CAD average PI:				0.0985482
SD				0.0791169	SD				0.060433	SD				0.0406094	SD				0.0216644	SD				0.0452797	SD				0.0537072	SD				0.091199
n				8	n				8	n				8	n				8	n				8	n				8	n				8
SEM				0.027972	SEM				0.0213663	SEM				0.0143576	SEM				0.00765953	SEM				0.0160088	SEM				0.0189884	SEM				0.0322437
Figure S1B
Gender	Putrescine	H2O	Total	P.I	Gender	Cadaverine	H2O	Total	P.I
Male (R)	1	0	1	1	Female (R)	0	1	1	-1
Female (L)	1	0	1	1	Male (L)	1	0	1	1
Male	1	0	1	1	Female	1	0	1	1
Female	1	0	1	1	Male	1	0	1	1
Male	1	0	1	1	Female	1	0	1	1
Female	0	1	1	-1	Male	0	1	1	-1
Male	1	0	1	1	Female	1	0	1	1
Female	1	0	1	1	Male	0	1	1	-1
Male	1	0	1	1	Female	1	0	1	1
Female	1	0	1	1	Male	1	0	1	1
Male	1	0	1	1	Female	1	0	1	1
Female	1	0	1	1	Male	1	0	1	1
Male	0	1	1	-1	Female	1	0	1	1
Female	1	0	1	1	Male	1	0	1	1
Male	1	0	1	1	Female	1	0	1	1
Female	1	0	1	1	Male	1	0	1	1
Male	1	0	1	1	Female	1	0	1	1
Female	1	0	1	1	Male	1	0	1	1
Male	1	0	1	1	Female	1	0	1	1
Female	1	0	1	1	Male	1	0	1	1
Male	1	0	1	1	Female	1	0	1	1
Female	1	0	1	1	Male	1	0	1	1
Male	1	0	1	1	Female	0	1	1	-1
Female	1	0	1	1	Male	1	0	1	1
Male	0	1	1	-1	Female	1	0	1	1
Female	1	0	1	1	Male	1	0	1	1
Male	1	0	1	1	Female	1	0	1	1
Female	1	0	1	1	Male	1	0	1	1
Male	1	0	1	1	Female	1	0	1	1
Female	1	0	1	1	Male	1	0	1	1
average PI				0.8	average PI				0.733333
n				30	n				30
SD				0.610257	SD				0.701862
SEM				0.111417	SEM				0.128142
Figure S1C
Antenna+ CS Flies										Antenna- CS Flies
Odors	male	female	total	Pi	Odors	male	female	total	PI	Odors	male	female	total	PI	Odors	male	female	total	PI
Putrescine					Cadaverine					Putrescine					Cadaverine
PUT	17	23	40	0.6	CAD	21	16	37	0.321429	Putrescine	14	18	32	0.0666667
H2O	9	1	10		H2O	7	12	19		H2O	12	16	28		CAD	14	18	32	0.0491803
PUT	18	13	31	0.47619	CAD	14	31	45	0.666667	Putrescine	15	10	25	0.0204082	H2O	13	16	29
H2O	7	4	11		H20	6	3	9		H20	11	13	24		CAD	18	12	30	-0.0769231
Put	20	19	39	0.444444	CAD	27	18	45	0.730769	Putrescine	13	18	31	-0.015873	H20	14	21	35
H2O	6	9	15		H2O	4	3	7		H2O	16	16	32		CAD	19	15	34	0.0625
Put	20	19	39	0.659574	CAD	22	14	36	0.531915	Putrescine	14	16	30	0.0169492	H2O	14	16	30
H2O	5	3	8		H2O	3	8	11		H2O	16	13	29		CAD	12	10	22	-0.0638298
Put	30	22	52	0.857143	CAD	28	13	41	0.413793	Putrescine	16	18	34	0.0625	H2O	8	17	25
H2O	3	1	4		H2O	4	13	17		H2O	17	13	30		CAD	15	18	33	0.0819672
Put	23	9	32	0.454545	CAD	19	17	36	0.469388	Putrescine	19	16	35	0.111111	H2O	16	12	28
H2O	7	5	12		H2O	6	7	13		H2O	13	15	28		CAD	20	18	38	0.0704225
Put	34	9	43	0.563636	CAD	28	9	37	0.608696	Putrescine	16	13	29	-0.107692	H2O	14	19	33
H20	7	5	12		H2O	6	3	9		H2O	17	19	36		CAD	16	13	29	-0.0491803
Put	26	13	39	0.471698	CAD	23	14	37	0.321429	Putrescine	18	15	33	0.03125	H2O	18	14	32
H2O	8	6	14		H2O	6	13	19		H2O	14	17	31		CAD	19	15	34	0.0793651
															H2O	13	16	29
average				0.565904	average				0.508011	average				0.023165	average				0.0191877
n				8	n				8	n				8	n				8
SD				0.140833	SD				0.153761	SD				0.0653926	SD				0.0694535
SEM				0.0497921	SEM				0.0543626	SEM				0.0231198	SEM				0.0245555
Figure S1D
ORCO-ve flies
Odors	male	female	total	Pi	Odors	male	female	total	PI
PUT	18	23	41	0.490909	CAD	17	38	55	0.833333
H2O	5	9	14		H2O	3	2	5
PUT	21	29	50	0.515152	CAD	17	25	42	0.584906
H2O	4	12	16		H20	4	7	11
Put	21	36	57	0.628571	CAD	24	28	52	0.650794
H2O	4	9	13		H2O	4	7	11
Put	14	16	30	0.363636	CAD	23	18	41	0.490909
H2O	5	9	14		H2O	6	8	14
Put	16	31	47	0.566667	CAD	16	22	38	0.52
H2O	3	10	13		H2O	3	9	12
Put	17	34	51	0.645161	CAD	9	26	35	0.590909
H2O	2	9	11		H2O	3	6	9
Put	18	42	60	0.846154	CAD	17	22	39	0.695652
H2O	4	1	5		H2O	3	4	7
Put	19	25	44	0.571429	CAD	18	16	34	0.387755
H2O	7	5	12		H2O	3	12	15
average				0.57846	average				0.594282
SD				0.139709	SD				0.136052
n				8	n				8
SEM				0.0493947	SEM				0.0481017
Figure S1E
control					ato-/-					control					ato-/-
Odors	male	female	total	Pi	Odors	male	female	total	Pi	Odors	male	female	total	Pi	Odors	male	female	total	Pi
PUT	0	37	37	0.48	PUT	0	33	33	0.03125	PUT	0	34	34	0.387755	PUT	0	22	22	0.0232558
H2O	0	13	13		H2O	0	31	31		H2O	0	15	15		H2O	0	21	21
PUT	0	43	43	0.592593	PUT	0	38	38	0.0857143	PUT	0	32	32	0.560976	PUT	0	19	19	0.0555556
H2O	0	11	11		H2O	0	32	32		H2O	0	9	9		H2O	0	17	17
PUT	0	42	42	0.5	PUT	0	32	32	0.0322581	PUT	0	33	33	0.65	PUT	0	21	21	0.0769231
H2O	0	14	14		H2O	0	30	30		H2O	0	7	7		H2O	0	18	18
PUT	0	38	38	0.433962	PUT	0	29	29	0.0943396	PUT	0	28	28	0.69697	PUT	0	31	31	0.0508475
H2O	0	15	15		H2O	0	24	24		H2O	0	5	5		H2O	0	28	28
PUT	0	34	34	0.446809	PUT	0	28	28	0.0769231	PUT	0	24	24	0.5	PUT	0	24	24	0.0434783
H2O	0	13	13		H2O	0	24	24		H2O	0	8	8		H2O	0	22	22
PUT	0	33	33	0.65	PUT	0	23	23	0.0952381	PUT	0	26	26	0.677419	PUT	0	24	24	0.170732
H2O	0	7	7		H2O	0	19	19		H2O	0	5	5		H2O	0	17	17
PUT	0	29	29	0.757576	PUT	0	32	32	0.0666667	PUT	0	26	26	0.529412	PUT	0	23	23	0.121951
H2O	0	4	4		H2O	0	28	28		H2O	0	8	8		H2O	0	18	18
PUT	0	28	28	0.473684	PUT	0	34	34	0.214286	PUT	0	31	31	0.631579	PUT	0	29	29	0.0943396
H2O	0	10	10		H2O	0	22	22		H2O	0	7	7		H2O	0	24	24
average				0.541828	average				0.0870844	average				0.579264	average				0.0796353
SD				0.114458	SD				0.0572522	SD				0.104886	SD				0.0481179
n				8	n				8	n				8	n				8
SEM				0.0404671	SEM				0.0202417	SEM				0.0370828	SEM				0.0170122
Figure S1F
IR31a- (f06333)										IR75a- (MB00253)										IR75a- (MI00303)										IR75d- (MB04616)										IR84a- (MI00501)
Odors	male	female	total	PI	Odors	male	female	total	PI	Odors	male	female	total	PI	Odors	male	female	total	PI	Odors	male	female	total	PI	Odors	male	female	total	PI	Odors	male	female	total	PI	Odors	male	female	total	PI	Odors	male	female	total	PI	Odors	male	female	total	PI
Put	22	24	46	0.483871	Cad	22	29	51	0.7	Put	20	29	49	0.719298	Ornithine	20	24	44	0.419355	Put	16	20	36	0.358491	Ornithine	16	41	57	0.676471	Put	23	20	43	0.409836	Spermidine	11	18	29	0.348837	Put	20	25	45	0.428571	Spermidine	13	27	40	0.509434
H2O	11	5	16		H2O	6	3	9		H2O	6	2	8		H2O	5	13	18		H2O	8	9	17		H2O	6	5	11		H2O	12	6	18		H2O	6	8	14		H2O	12	6	18		H2O	5	8	13
Put	23	25	48	0.6	Cad	18	29	47	0.649123	Put	23	25	48	0.655172	Ornithine	29	19	48	0.391304	Put	19	26	45	0.47541	Ornithine	29	31	60	0.791045	Put	29	12	41	0.576923	Spermidine	23	33	56	0.577465	Put	28	17	45	0.636364	Spermidine	19	22	41	0.673469
H2O	9	3	12		H2O	6	4	10		H2O	4	6	10		H2O	12	9	21		H2O	8	8	16		H2O	4	3	7		H2O	6	5	11		H2O	8	7	15		H2O	6	4	10		H2O	2	6	8
Put	19	33	52	0.6	Cad	13	43	56	0.69697	Put	18	29	47	0.382353	Ornithine	23	22	45	0.551724	Put	22	25	47	0.287671	Ornithine	26	23	49	0.849057	Put	33	17	50	0.754386	Spermidine	21	20	41	0.464286	Put	33	29	62	0.589744	Spermidine	21	19	40	0.355932
H2O	5	8	13		H2O	4	6	10		H2O	8	13	21		H2O	4	9	13		H2O	14	12	26		H2O	3	1	4		H2O	5	2	7		H2O	12	3	15		H2O	8	8	16		H2O	17	2	19
Put	22	31	53	0.536232	Cad	18	42	60	0.690141	Put	12	33	45	0.551724	Ornithine	26	27	53	0.766667	Put	33	18	51	0.672131	Ornithine	34	27	61	0.435294	Put	31	23	54	0.6875	Spermidine	19	29	48	0.6	Put	23	26	49	0.781818	Spermidine	18	25	43	0.791667
H2O	8	8	16		H2O	3	8	11		H2O	9	4	13		H2O	4	3	7		H2O	8	2	10		H2O	12	12	24		H2O	4	6	10		H2O	7	5	12		H2O	2	4	6		H2O	3	2	5
Put	17	36	53	0.65625	Cad	16	35	51	0.5	Put	13	26	39	0.392857	Ornithine	29	20	49	0.462687	Put	29	31	60	0.538462	Ornithine	21	10	31	0.55	Put	22	25	47	0.649123	Spermidine	5	34	39	0.130435	Put	27	25	52	0.552239	Spermidine	6	31	37	0.15625
H2O	3	8	11		H2O	8	9	17		H2O	6	11	17		H2O	13	5	18		H2O	12	6	18		H2O	2	7	9		H2O	8	2	10		H2O	28	2	30		H2O	12	3	15		H2O	24	3	27
Put	12	14	26	0.444444	Cad	32	29	61	0.506173	Put	21	21	42	0.292308	Ornithine	14	37	51	0.672131	Put	31	34	65	0.780822	Ornithine	45	17	62	0.771429	Put	31	23	54	0.542857	Spermidine	29	23	52	0.6	Put	27	22	49	0.633333	Spermidine	33	14	47	0.843137
H2O	6	4	10		H2O	15	5	20		H2O	18	5	23		H2O	4	6	10		H2O	7	1	8		H2O	4	4	8		H2O	5	11	16		H2O	5	8	13		H2O	3	8	11		H2O	2	2	4
Put	21	31	52	0.733333	Cad	9	34	43	0.323077	Put	23	29	52	0.733333	Ornithine	19	38	57	0.583333	Put	34	35	69	0.604651	Ornithine	16	29	45	0.47541	Put	28	9	37	0.574468	Spermidine	35	30	65	0.733333	Put	33	5	38	0.55102	Spermidine	31	30	61	0.71831
H2O	4	4	8		H2O	12	10	22		H2O	5	3	8		H2O	8	7	15		H2O	9	8	17		H2O	12	4	16		H2O	5	5	10		H2O	5	5	10		H2O	9	2	11		H2O	2	8	10
Put	23	16	39	0.591837	Cad	23	43	66	0.76	Put	31	29	60	0.764706	Ornithine	22	27	49	0.661017	Put	23	29	52	0.424658	Ornithine	14	24	38	0.52	Put	4	33	37	0.423077	Spermidine	7	27	34	0.333333	Put	5	34	39	0.322034	Spermidine	19	29	48	0.655172
H2O	7	3	10		H2O	5	4	9		H2O	2	6	8		H2O	2	8	10		H2O	15	6	21		H2O	9	3	12		H2O	9	6	15		H2O	16	1	17		H2O	8	12	20		H2O	6	4	10
average				0.580746	average				0.603185	average				0.561469	average				0.563527	average				0.517787	average				0.633588	average				0.577271	average				0.473461	average				0.56189	average				0.587921
n				8	n				8	n				8	n				8	n				8	n				8	n				8	n				8	n				8	n				8
SD				0.0924218	SD				0.146848	SD				0.184231	SD				0.13294	SD				0.164655	SD				0.158695	SD				0.120526	SD				0.193941	SD				0.139033	SD				0.233547
SEM				0.0326761	SEM				0.0519186	SEM				0.0651356	SEM				0.0470014	SEM				0.0582145	SEM				0.0561071	SEM				0.0426123	SEM				0.0685686	SEM				0.0491555	SEM				0.0825713
[truncated: 10 more columns]

## Sheet: Figure S3 Data
	PUTRESCINE STIMULATION
	Genotype: IR76b-Gal4,UAS-GCaMP6f ; IR76b1
	Peak Max (0 ppm)	Peak Max (10 ppm)
fly-1	2.13163	2.61788
fly-2	1.15074	0.335663
fly-3	3.50577	7.01822
fly-4	1.01461	1.67224
fly-5	3.11842	1.9967
fly-6	-0.171826	2.26345
AVG	1.79156	2.65069
STD	1.39168	2.27907
N	6	6
SEM	0.568152	0.930426
	Genotype: IR76b-Gal4,UAS-GCaMP6f ; IR76b1/+
	Peak Max (0 ppm)	Peak Max (10 ppm)
fly-1	0.245549	3.7713
fly-2	2.12837	5.15873
fly-3	1.01985	3.91048
fly-4	1.70337	9.6184
fly-5	3.99411	1.44512
fly-6	0.829228	2.2974
AVG	1.65341	4.36691
STD	1.32436	2.88402
N	6	6
SEM	0.540669	1.1774

## Sheet: Figure S4 Data
Figure S4A
agarose	agarose	total	PI	Spermine	Agarose	total	PI	Spermidine	Agarose	total	PI	Diaminopropane	Agarose	total	PI	Putrescine	Agarose	total	PI	Cadaerine	Agarose	total	PI	Diaminhexane	Agarose	total	PI	Diaminoheptane	Agarose	total	PI	Diaminooctane	Agarose	total	PI	Diaminodecane	Agarose	total	PI	Put	Cad	total
74	58	132	0.121212	17	87	104	-0.673077	24	197	221	-0.782805	23	103	126	-0.634921	16	86	102	-0.686275	13	88	101	-0.742574	8	176	184	-0.913043	27	167	194	-0.721649	27	153	180	-0.7	29	117	146	-0.60274	63	52	115	0.0956522
47	52	99	-0.0505051	18	117	135	-0.733333	8	87	95	-0.831579	12	125	137	-0.824818	18	91	109	-0.669725	10	124	134	-0.850746	19	168	187	-0.796791	12	125	137	-0.824818	37	156	193	-0.61658	31	138	169	-0.633136	41	63	104	-0.211538
55	44	99	0.111111	8	126	134	-0.880597	14	105	119	-0.764706	8	83	91	-0.824176	12	56	68	-0.647059	23	143	166	-0.722892	27	165	192	-0.71875	24	85	109	-0.559633	29	163	192	-0.697917	14	92	106	-0.735849	37	29	66	0.121212
39	46	85	-0.0823529	16	83	99	-0.676768	8	92	100	-0.84	17	108	125	-0.728	24	76	100	-0.52	13	76	89	-0.707865	16	152	168	-0.809524	18	119	137	-0.737226	18	142	160	-0.775	7	153	160	-0.9125	72	59	131	0.0992366
81	106	187	-0.13369	3	86	89	-0.932584	14	73	87	-0.678161	6	164	170	-0.929412	17	96	113	-0.699115	19	74	93	-0.591398	24	123	147	-0.673469	22	167	189	-0.767196	14	106	120	-0.766667	16	114	130	-0.753846	58	47	105	0.104762
80	82	162	-0.0123457	19	97	116	-0.672414	19	114	133	-0.714286	25	126	151	-0.668874	23	75	98	-0.530612	17	121	138	-0.753623	17	153	170	-0.8	19	162	181	-0.790055	17	146	163	-0.791411	26	86	112	-0.535714	72	54	126	0.142857
78	70	148	0.0540541	6	152	158	-0.924051	15	127	142	-0.788732	41	147	188	-0.56383	7	136	143	-0.902098	24	78	102	-0.529412	21	78	99	-0.575758	24	119	143	-0.664336	19	96	115	-0.669565	5	163	168	-0.940476	75	61	136	0.102941
116	97	213	0.0892019	46	164	210	-0.561905	14	93	107	-0.738318	9	136	145	-0.875862	27	98	125	-0.568	13	85	98	-0.734694	19	85	104	-0.634615	37	96	133	-0.443609	16	162	178	-0.820225	18	132	150	-0.76	96	84	180	0.0666667
71.25	69.375		0.0120857	16.625	114		-0.756841	14.5	111		-0.767323	17.625	124		-0.756236	18	89.25		-0.65286	16.5	98.625		-0.70415	18.875	137.5		-0.740244	22.875	130		-0.688565	22.125	140.5		-0.729671	18.25	124.375		-0.734283	64.25	56.125		0.0652237
24.259	23.5611		0.0956978	13.3303	31.305		0.13798	5.2915	38.5487		0.0557031	11.7344	25.7904		0.127496	6.59004	23.3162		0.122761	5.12696	26.6079		0.0999707	5.69304	38.0338		0.10991	7.33753	32.0936		0.128577	8.00781	25.5455		0.0694119	9.7358	27.3545		0.142572	19.1517	15.5695		0.113911
8	8		8	8	8		8	8	8		8	8	8		8	8	8		8	8	8		8	8	8		8	8	8		8	8	8		8	8	8		8	8	8		8
8.57686	8.3301		0.0338343	4.71297	11.068		0.0487833	1.87083	13.629		0.019694	4.14874	9.11827		0.0450766	2.32993	8.2435		0.0434024	1.81265	9.40733		0.035345	2.01279	13.447		0.0388591	2.59421	11.3468		0.0454588	2.83119	9.03169		0.0245408	3.44212	9.67127		0.0504068	6.77113	5.50467		0.0402735
Figure S4B-C
0.001mM								0.01mM								0.1mM								1mM								10mM								100mM								1000mM
Putrescine	Agarose	total	PI	Cadaerine	Agarose	total	PI	Putrescine	Agarose	total	PI	Cadaerine	Agarose	total	PI	Putrescine	Agarose	total	PI	Cadaerine	Agarose	total	PI	Putrescine	Agarose	total	PI	Cadaerine	Agarose	total	PI	Putrescine	Agarose	total	PI	Cadaerine	Agarose	total	PI	Putrescine	Agarose	total	PI	Cadaerine	Agarose	total	PI	Putrescine	Agarose
42	43	85	-0.0117647	31	44	75	-0.173333	39	54	93	-0.16129	34	46	80	-0.15	28	76	104	-0.461538	4	67	71	-0.887324	18	47	65	-0.446154	25	73	98	-0.489796	18	106	124	-0.709677	10	67	77	-0.74026	10	68	78	-0.74359	13	80	93	-0.72043	20	81
39	42	81	-0.037037	47	54	101	-0.0693069	34	49	83	-0.180723	38	47	85	-0.105882	22	59	81	-0.45679	18	56	74	-0.513514	19	62	81	-0.530864	17	78	95	-0.642105	12	67	79	-0.696203	17	52	69	-0.507246	21	89	110	-0.618182	15	70	85	-0.647059	16	62
38	47	85	-0.105882	43	48	91	-0.0549451	36	46	82	-0.121951	32	43	75	-0.146667	16	77	93	-0.655914	18	88	106	-0.660377	13	79	92	-0.717391	21	95	116	-0.637931	27	78	105	-0.485714	19	88	107	-0.64486	12	75	87	-0.724138	3	129	132	-0.954545	29	47
46	49	95	-0.0315789	59	51	110	0.0727273	37	48	85	-0.129412	37	49	86	-0.139535	18	58	76	-0.526316	23	86	109	-0.577982	22	64	86	-0.488372	19	46	65	-0.415385	14	84	98	-0.714286	15	52	67	-0.552239	16	74	90	-0.644444	18	76	94	-0.617021	15	109
41	43	84	-0.0238095	54	47	101	0.0693069	31	44	75	-0.173333	42	43	85	-0.0117647	25	89	114	-0.561404	14	56	70	-0.6	16	57	73	-0.561644	18	89	107	-0.663551	17	57	74	-0.540541	12	61	73	-0.671233	14	67	81	-0.654321	16	96	112	-0.714286	19	93
38	46	84	-0.0952381	45	83	128	-0.296875	39	24	63	0.238095	39	81	120	-0.35	10	66	76	-0.736842	25	67	92	-0.456522	13	59	72	-0.638889	19	98	117	-0.675214	18	56	74	-0.513514	17	89	106	-0.679245	18	78	96	-0.625	14	46	60	-0.533333	13	71
40	38	78	0.025641	44	56	100	-0.12	51	78	129	-0.209302	24	31	55	-0.127273	17	80	97	-0.649485	17	72	89	-0.617978	18	77	95	-0.621053	12	87	99	-0.757576	15	59	74	-0.594595	23	98	121	-0.619835	14	81	95	-0.705263	17	116	133	-0.744361	14	74
43	64	107	-0.196262	49	66	115	-0.147826	54	65	119	-0.092437	37	48	85	-0.129412	22	29	51	-0.137255	20	63	83	-0.518072	24	76	100	-0.52	17	81	98	-0.653061	10	77	87	-0.770115	13	117	130	-0.8	22	56	78	-0.435897	19	128	147	-0.741497	19	124
40.875	46.5		-0.0594914	46.5	56.125		-0.0900315	40.125	51		-0.103794	35.375	48.5		-0.145067	19.75	66.75		-0.523193	17.375	69.375		-0.603971	17.875	65.125		-0.565546	18.5	80.875		-0.616827	16.375	73		-0.62808	15.75	78		-0.651865	15.875	73.5		-0.643854	14.375	92.625		-0.709067	18.125	82.625
2.74838	7.83764		0.0699162	8.28079	12.8		0.123925	8.11414	15.8114		0.143026	5.50162	14.3028		0.0940529	5.67576	18.6068		0.184329	6.41288	12.1883		0.131833	3.90741	11.3066		0.0886566	3.70328	16.4007		0.10988	5.15302	17.021		0.107625	4.16619	23.616		0.0947156	4.22366	9.9857		0.0960165	5.01248	29.89		0.123006	5.08324	25.1336
8	8		8	8	8		8	8	8		8	8	8		8	8	8		8	8	8		8	8	8		8	8	8		8	8	8		8	8	8		8	8	8		8	8	8		8	8	8
0.971698	2.77102		0.0247191	2.9277	4.52547		0.043814	2.86878	5.59017		0.0505673	1.94512	5.05682		0.0332527	2.00669	6.57851		0.06517	2.26729	4.3092		0.0466102	1.38148	3.99749		0.0313448	1.30931	5.79851		0.0388485	1.82187	6.01783		0.0380512	1.47297	8.34951		0.033487	1.49329	3.53048		0.033947	1.77218	10.5677		0.0434891	1.7972	8.88606
Figure S4D
Putrescine	Agarose	total	PI	cadaverine	Agarose	total	PI
0	5	5	-1	1	5	6	-0.666667
1	6	7	-0.714286	4	5	9	-0.111111
2	15	17	-0.764706	2	6	8	-0.5
0	13	13	-1	2	9	11	-0.636364
1	12	13	-0.846154	0	8	8	-1
3	9	12	-0.5	2	7	9	-0.555556
2	1	3	0.333333	1	6	7	-0.714286
3	9	12	-0.5	0	3	3	-1
0	3	3	-1	1	11	12	-0.833333
0	5	5	-1	3	7	10	-0.4
2	16	18	-0.777778	8	9	17	-0.0588235
3	9	12	-0.5	0	13	13	-1
2	7	9	-0.555556	2	15	17	-0.764706
0	19	19	-1	4	8	12	-0.333333
4	14	18	-0.555556	3	4	7	-0.142857
0	12	12	-1	5	5	10	0
1	12	13	-0.846154	3	7	10	-0.4
5	4	9	0.111111	1	12	13	-0.846154
3	17	20	-0.7	0	10	10	-1
2	10	12	-0.666667	2	6	8	-0.5
2	6	8	-0.5	1	15	16	-0.875
0	8	8	-1	1	12	13	-0.846154
1	10	11	-0.818182	0	17	17	-1
3	3	6	0	2	6	8	-0.5
2	5	7	-0.428571	0	10	10	-1
5	12	17	-0.411765	3	8	11	-0.454545
3	3	6	0	1	3	4	-0.5
2	7	9	-0.555556	0	13	13	-1
5	5	10	0	1	6	7	-0.714286
1	3	4	-0.5	0	9	9	-1
1.93333	8.66667		-0.589883	1.76667	8.5		-0.645106
30	30		30	30	30		30
1.55216	4.72946		0.369038	1.81342	3.66484		0.313178
0.283384	0.863478		0.0673769	0.331084	0.669105		0.0571783
Figure S4E
PUT	APPLE	total	PI	CAD	APPLE	total	PI	PUT+APPLE	APPLE	total	PI	CAD+APPLE	APPLE	total	PI	Agarose CONTROL
number of eggs				number of eggs				number of eggs				number of eggs				left half	right half	total
54	268	322	-0.664596	36	281	317	-0.772871	276	35	311	0.77492	287	43	330	0.739394	143	119	262	0.0916031
45	251	296	-0.695946	38	266	304	-0.75	291	51	342	0.701754	319	47	366	0.743169	165	142	307	0.0749186
54	287	341	-0.683284	54	298	352	-0.693182	301	38	339	0.775811	261	28	289	0.806228	124	154	278	-0.107914
63	312	375	-0.664	53	287	340	-0.688235	297	23	320	0.85625	266	38	304	0.75	173	148	321	0.0778816
33	290	323	-0.795666	45	287	332	-0.728916	314	37	351	0.789174	264	37	301	0.754153	165	132	297	0.111111
37	295	332	-0.777108	32	290	322	-0.801242	328	42	370	0.772973	271	42	313	0.731629	176	181	357	-0.0140056
32	298	330	-0.806061	41	267	308	-0.733766	298	53	351	0.698006	295	37	332	0.777108	113	126	239	-0.0543933
26	301.9	327.9	-0.841415	58	311	369	-0.685637	276	34	310	0.780645	327	48	375	0.744	153	186	339	-0.0973451
41	305	346	-0.763006	61	301	362	-0.662983	325	38	363	0.790634	265	54	319	0.661442	142	134	276	0.0289855
44	308	352	-0.75	42	275	317	-0.735016	284	29	313	0.814696	294	39	333	0.765766	162	141	303	0.0693069
29	267	296	-0.804054	48	276	324	-0.703704	201	41	242	0.661157	264	29	293	0.802048	173	162	335	0.0328358
64	315	379	-0.662269	65	324	389	-0.66581	327	39	366	0.786885	285	61	346	0.647399	166	149	315	0.0539683
37	319	356	-0.792135	51	265	316	-0.677215	318	45	363	0.752066	281	31	312	0.801282	142	123	265	0.0716981
49	321	370	-0.735135	42	298	340	-0.752941	237	38	275	0.723636	273	34	307	0.778502	170	161	331	0.0271903
45	325	370	-0.756757	58	318	376	-0.691489	285	26	311	0.832797	314	47	361	0.739612	152	181	333	-0.0870871
47	328	375	-0.749333	63	315	378	-0.666667	271	42	313	0.731629	276	48	324	0.703704	148	173	321	-0.0778816
14.5833	99.8104		-0.746298	16.3958	97.0625		-0.713105	96.4375	12.7292		0.76519	94.625	13.8125		0.74659	51.3958	50.25		0.0125546
3.76829	7.44333		0.0571508	3.39982	6.37265		0.0416048	11.2775	2.66727		0.051575	6.98239	3.04039		0.045666	6.05067	7.20853		0.0745357
16	16		16	16	16		16	16	16		16	16	16		16	16	16		16
0.942072	1.86083		0.0142877	0.849956	1.59316		0.0104012	2.81936	0.666819		0.0128937	1.7456	0.760098		0.0114165	1.51267	1.80213		0.0186339
Figure S4F
1%agarose+5% sugar	1%agarose+5% sugar+1mM Put
14	26
8	32
10	47
7	21
9	39
17	28
6	38
8	40
9.875	33.875
3.75832	8.60959
8	8
1.32877	3.04395
Figure S4G
CS (Antenna +)								Antenna -								wings (-)								Front 2 legs surgically removed								Middle 2 legs surgically removed								Hind 2 legs surgically removed								labellum surgically removed
Putrescine	Agarose	total	PI	Cadaverine	Agarose	total	PI	Putrescine	Agarose	total	PI	Cadaverine	Agarose	total	PI	Putrescine	Agarose	total	PI	Cadaverine	Agarose	total	PI	Putrescine	Agarose	total	PI	Cadaverine	Agarose	total	PI	Putrescine	Agarose	total	PI	Cadaverine	Agarose	total	PI	Putrescine	Agarose	total	PI	Cadaverine	Agarose	total	PI	Putrescine	Agarose
12	62	74	-0.675676	8	78	86	-0.813953	16	86	102	-0.686275	31	143	174	-0.643678	12	76	88	-0.727273	7	82	89	-0.842697	17	69	86	-0.604651	12	65	77	-0.688312	6	87	93	-0.870968	14	87	101	-0.722772	20	51	71	-0.43662	20	72	92	-0.565217	34	57
10	57	67	-0.701493	5	64	69	-0.855072	18	91	109	-0.669725	28	82	110	-0.490909	19	85	104	-0.634615	12	79	91	-0.736264	16	52	68	-0.529412	14	75	89	-0.685393	10	96	106	-0.811321	10	91	101	-0.80198	15	114	129	-0.767442	17	87	104	-0.673077	51	32
5	53	58	-0.827586	13	59	72	-0.638889	12	56	68	-0.647059	26	125	151	-0.655629	8	69	77	-0.792208	15	71	86	-0.651163	28	82	110	-0.490909	10	53	63	-0.68254	17	105	122	-0.721311	15	105	120	-0.75	12	98	110	-0.781818	19	94	113	-0.663717	20	29
14	68	82	-0.658537	11	83	94	-0.765957	24	76	100	-0.52	18	113	131	-0.725191	18	81	99	-0.636364	9	68	77	-0.766234	19	84	103	-0.631068	21	62	83	-0.493976	14	77	91	-0.692308	14	113	127	-0.779528	16	107	123	-0.739837	22	119	141	-0.687943	37	39
10	113	123	-0.837398	13	71	84	-0.690476	32	81	113	-0.433628	26	91	117	-0.555556	7	74	81	-0.82716	11	59	70	-0.685714	14	131	145	-0.806897	13	105	118	-0.779661	10	78	88	-0.772727	16	114	130	-0.753846	11	114	125	-0.824	11	98	109	-0.798165	42	37
13	109	122	-0.786885	12	64	76	-0.684211	26	92	118	-0.559322	28	116	144	-0.611111	16	65	81	-0.604938	14	77	91	-0.692308	19	96	115	-0.669565	21	76	97	-0.56701	12	110	122	-0.803279	13	97	110	-0.763636	19	63	82	-0.536585	26	103	129	-0.596899	35	30
17	76	93	-0.634409	15	114	129	-0.767442	18	119	137	-0.737226	32	145	177	-0.638418	13	109	122	-0.786885	6	102	108	-0.888889	17	84	101	-0.663366	22	94	116	-0.62069	14	94	108	-0.740741	12	82	94	-0.744681	13	78	91	-0.714286	12	110	122	-0.803279	39	21
20	102	122	-0.672131	11	57	68	-0.676471	27	84	111	-0.513514	19	124	143	-0.734266	17	82	99	-0.656566	13	86	99	-0.737374	11	103	114	-0.807018	12	81	93	-0.741935	17	77	94	-0.638298	15	87	102	-0.705882	22	97	119	-0.630252	14	79	93	-0.698925	45	25
12	87	99	-0.757576	16	72	88	-0.636364
14	76	90	-0.688889	10	96	106	-0.811321	21.625	85.625		-0.595844	26	117.375		-0.631845	13.75	80.125	93.875	-0.708251	10.875	78	88.875	-0.75008	17.625	87.625	105.25	-0.650361	15.625	76.375	92	-0.65744	12.5	90.5	103	-0.756369	13.625	97	110.625	-0.752791	16	90.25	106.25	-0.678855	17.625	95.25	112.875	-0.685903	37.875	33.75
19	92	111	-0.657658	20	97	117	-0.65812	6.67485	17.6387		0.104489	5.09902	22.3283		0.0811218	4.52769	13.4636	15.1038	0.0859138	3.27054	12.9173	11.8495	0.080821	8	8	8	8	8	8	8	8	8	8	8	8	8	8	8	8	8	8	8	8	8	8	8	8	8	8
24	90	114	-0.578947	32	114	146	-0.561644	8	8		8	8	8		8	8	8	8	8	8	8	8	8	4.95516	23.4882	22.5373	0.114703	4.8679	17.054	18.6471	0.0931132	3.77964	12.9063	13.6591	0.0738131	1.92261	12.3635	13.4583	0.0303039	4	23.7472	22.0049	0.134042	5.15302	15.6912	17.1501	0.0842589	9.14076	11.068
12	97	109	-0.779817	18	64	82	-0.560976	2.35991	6.23623		0.0369426	1.80278	7.89425		0.0286809	1.60078	4.76009	5.34	0.0303751	1.15631	4.56696	4.18943	0.0285745	1.75191	8.30434	7.96813	0.0405537	1.72106	6.0295	6.59274	0.0329205	1.33631	4.56305	4.82923	0.0260969	0.679745	4.37117	4.75822	0.010714	1.41421	8.3959	7.7799	0.0473911	1.82187	5.54768	6.06347	0.02979	3.23175	3.91312
19	90	109	-0.651376	20	75	95	-0.578947
16	72	88	-0.636364	4	81	85	-0.905882
20	85	105	-0.619048	16	98	114	-0.719298
17	83.0625	97.875	-0.697737	14	80.4375	94.4375	-0.707814
8	16	16	16	16	16	16	16
4.24264	17.8754	20.1259	0.0771313	6.72309	18.439	22.4112	0.104455
1.5	4.46884	5.03146	0.0192828	1.68077	4.60974	5.6028	0.0261138
Figure S4H
Poxn-/-								Poxn-/-;rescue SuperA
Putrescine	Agarose	total	PI	Cadaerine	Agarose	total	PI	Putrescine	Agarose	total	PI	Cadaerine	Agarose	total	PI
63	51	114	0.105263	72	68	140	0.0285714	17	75	92	-0.630435	58	107	165	-0.29697
56	53	109	0.0275229	37	42	79	-0.0632911	19	65	84	-0.547619	12	45	57	-0.578947
30	28	58	0.0344828	24	18	42	0.142857	57	104	161	-0.291925	26	58	84	-0.380952
25	28	53	-0.0566038	27	31	58	-0.0689655	16	56	72	-0.555556	15	43	58	-0.482759
23	18	41	0.121951	103	76	179	0.150838	39	68	107	-0.271028	33	84	117	-0.435897
69	66	135	0.0222222	44	38	82	0.0731707	12	56	68	-0.647059	16	45	61	-0.47541
51	48	99	0.030303	48	46	94	0.0212766	27	105	132	-0.590909	15	44	59	-0.491525
28	19	47	0.191489	32	21	53	0.207547	16	48	64	-0.5	19	77	96	-0.604167
43.125	38.875	82	0.0595789	48.375	42.5	90.875	0.0615006	25.375	72.125	97.5	-0.504316	24.25	62.875	87.125	-0.468328
18.6198	17.8601	36.2018	0.0763321	26.7525	20.702	46.7713	0.100969	15.371	21.6296	34.1593	0.145323	15.2854	23.9251	38.3124	0.0996675
8	8	8	8	8	8	8	8	8	8	8	8	8	8	8	8
6.58309	6.31449	12.7993	0.0269875	9.45844	7.31925	16.5361	0.0356978	5.43447	7.64722	12.0771	0.0513796	5.4042	8.4588	13.5455	0.0352378
Figure S4I-J
C.S Control				C.S								ORCO								IR8a-								IR25a (36)								Ir25a (37)								Ir76b- (24)
Agarose	Agarose	total	PI	Put	Agarose	total	PI	CAD	Agarose	total	PI	PUT	Agarose	total	PI	CAD	Agarose	total	PI	PUT	Agarose	total	PI	CAD	Agarose	total	PI	PUT	Agarose	total	PI	CAD	Agarose	total	PI	PUT	Agarose	total	PI	CAD	Agarose	total	PI	PUT	Agarose	total	PI	CAD	Agarose
59	56	115	0.026087	12	87	99	-0.757576	13	78	91	-0.714286	8	38	46	-0.652174	18	57	75	-0.52	16	47	63	-0.492063	9	32	41	-0.560976	8	24	32	-0.5	8	26	34	-0.529412	8	32	40	-0.6	7	28	35	-0.6	37	43	80	-0.075	44	42
64	61	125	0.024	19	68	87	-0.563218	24	121	145	-0.668966	12	39	51	-0.529412	12	39	51	-0.529412	9	26	35	-0.485714	7	20	27	-0.481481	12	43	55	-0.563636	7	18	25	-0.44	11	48	59	-0.627119	12	38	50	-0.52	42	51	93	-0.0967742	26	47
57	48	105	0.0857143	21	95	116	-0.637931	28	118	146	-0.616438	11	45	56	-0.607143	14	46	60	-0.533333	11	48	59	-0.627119	26	49	75	-0.306667	29	67	96	-0.395833	31	67	98	-0.367347	24	46	70	-0.314286	8	37	45	-0.644444	33	37	70	-0.0571429	39	52
59	63	122	-0.0327869	15	81	96	-0.6875	26	93	119	-0.563025	14	47	61	-0.540984	12	39	51	-0.529412	27	45	72	-0.25	12	46	58	-0.586207	26	78	104	-0.5	29	78	107	-0.457944	29	79	108	-0.462963	13	45	58	-0.551724	37	46	83	-0.108434	36	49
45	46	91	-0.010989	19	81	100	-0.62	18	45	63	-0.428571	12	92	104	-0.769231	25	65	90	-0.444444	21	63	84	-0.5	14	78	92	-0.695652	14	74	88	-0.681818	25	83	108	-0.537037	21	58	79	-0.468354	22	54	76	-0.421053	21	45	66	-0.363636	32	45
65	57	122	0.0655738	27	91	118	-0.542373	23	65	88	-0.477273	16	73	89	-0.640449	13	76	89	-0.707865	13	69	82	-0.682927	29	81	110	-0.472727	8	66	74	-0.783784	22	67	89	-0.505618	12	69	81	-0.703704	34	65	99	-0.313131	29	41	70	-0.171429	24	41
61	71	132	-0.0757576	19	65	84	-0.547619	16	67	83	-0.614458	21	112	133	-0.684211	19	71	90	-0.577778	28	47	75	-0.253333	16	77	93	-0.655914	21	69	90	-0.533333	27	69	96	-0.4375	23	71	94	-0.510638	28	68	96	-0.416667	27	27	54	0	27	23
42	32	74	0.135135	12	57	69	-0.652174	12	81	93	-0.741935	22	76	98	-0.55102	16	54	70	-0.542857	23	58	81	-0.432099	23	69	92	-0.5	26	80	106	-0.509434	32	77	109	-0.412844	28	67	95	-0.410526	33	71	104	-0.365385	33	39	72	-0.0833333	31	21
56.5	54.25		0.0271221	18	78.125		-0.626049	20	83.5		-0.603119	14.5	65.25		-0.621828	16.125	55.875		-0.548138	18.5	50.375		-0.465407	17	56.5		-0.532453	18	62.625		-0.55848	22.625	60.625		-0.460963	19.5	58.75		-0.512199	19.625	50.75		-0.47905	32.375	41.125		-0.119469	32.375	40
8.48528	12.0446		0.0678391	4.98569	13.453		0.0746769	6.07101	26.2406		0.109663	4.89898	27.39		0.0821086	4.45413	14.0858		0.0745307	7.28991	13.1794		0.155044	8.10643	23.1084		0.121759	8.53564	19.3312		0.120909	9.86969	24.6051		0.0592151	8.08879	15.7094		0.126178	11.0704	16.14		0.117502	6.61033	7.18008		0.109802	6.90626	11.6741
8	8		8	8	8		8	8	8		8	8	8		8	8	8		8	8	8		8	8	8		8	8	8		8	8	8		8	8	8		8	8	8		8	8	8		8	8	8
3	4.2584		0.0239847	1.76271	4.75634		0.0264023	2.14643	9.27747		0.0387716	1.73205	9.68384		0.0290298	1.57477	4.98009		0.0263506	2.57737	4.65962		0.0548163	2.86606	8.17007		0.0430485	3.0178	6.83462		0.0427477	3.48946	8.69921		0.0209357	2.85982	5.55412		0.0446105	3.91397	5.70636		0.0415432	2.3371	2.53854		0.0388208	2.44173	4.12743
Figure S4K
Canton S								UAS-Kir2.1								w1118								Gr5a-Gal4								Gr5a-Gal4>Kir2.1								Gr64f-Gal4								Gr64f-Gal4>Kir2.1
Putrescine	Agarose	total	PI	Cadaverine	Agarose	total	PI	Putrescine	Agarose	total	PI	Cadaverine	Agarose	total	PI	Putrescine	Agarose	total	PI	Cadaverine	Agarose	total	PI	Putrescine	Agarose	total	PI	Cadaverine	Agarose	total	PI	Putrescine	Agarose	total	PI	Cadaverine	Agarose	total	PI	Putrescine	Agarose	total	PI	Cadaverine	Agarose	total	PI	Putrescine	Agarose
12	95	107	-0.775701	14	117	131	-0.78626	9	98	107	-0.831776	19	74	93	-0.591398	22	86	108	-0.592593	13	78	91	-0.714286	12	87	99	-0.757576	21	86	107	-0.607477	16	67	83	-0.614458	18	76	94	-0.617021	16	77	93	-0.655914	12	76	88	-0.727273	12	78
18	116	134	-0.731343	19	128	147	-0.741497	16	105	121	-0.735537	21	88	109	-0.614679	17	99	116	-0.706897	16	86	102	-0.686275	19	76	95	-0.6	15	92	107	-0.719626	29	83	112	-0.482143	15	93	108	-0.722222	32	109	141	-0.546099	18	83	101	-0.643564	29	116
29	81	110	-0.472727	27	115	142	-0.619718	23	92	115	-0.6	27	104	131	-0.587786	14	86	100	-0.72	19	103	122	-0.688525	15	94	109	-0.724771	28	71	99	-0.434343	15	113	128	-0.765625	23	72	95	-0.515789	26	104	130	-0.6	19	56	75	-0.493333	28	134
26	57	83	-0.373494	16	82	98	-0.673469	24	73	97	-0.505155	26	94	120	-0.566667	23	89	112	-0.589286	27	75	102	-0.470588	17	62	79	-0.56962	20	68	88	-0.545455	28	87	115	-0.513043	21	49	70	-0.4	12	87	99	-0.757576	16	81	97	-0.670103	26	56
18	87	105	-0.657143	34	91	125	-0.456	19	67	86	-0.55814	23	103	126	-0.634921	25	94	119	-0.579832	21	92	113	-0.628319	10	83	93	-0.784946	19	82	101	-0.623762	14	93	107	-0.738318	24	113	137	-0.649635	15	67	82	-0.634146	31	69	100	-0.38	13	58
28	119	147	-0.619048	12	61	73	-0.671233	26	78	104	-0.5	22	84	106	-0.584906	27	67	94	-0.425532	24	61	85	-0.435294	8	91	99	-0.838384	13	102	115	-0.773913	22	37	59	-0.254237	19	124	143	-0.734266	17	57	74	-0.540541	21	75	96	-0.5625	18	39
15	62	77	-0.61039	23	76	99	-0.535354	13	82	95	-0.726316	32	93	125	-0.488	13	57	78	-0.564103	22	81	103	-0.572816	17	88	105	-0.67619	16	81	97	-0.670103	8	68	76	-0.789474	16	65	81	-0.604938	10	84	94	-0.787234	22	53	75	-0.413333	16	63
13	74	87	-0.701149	38	112	150	-0.493333	16	91	107	-0.700935	36	90	126	-0.428571	16	103	119	-0.731092	16	93	109	-0.706422	21	92	113	-0.628319	17	74	91	-0.626374	36	124	160	-0.55	27	61	88	-0.386364	14	64	78	-0.641026	18	87	105	-0.657143	24	56
19.875	86.375		-0.617624	22.875	97.75		-0.622108	18.25	85.75		-0.644732	25.75	91.25		-0.562116	19.625	85.125		-0.613667	19.75	83.625		-0.612815	14.875	84.125		-0.697476	18.625	82		-0.625132	21	84		-0.588412	20.375	81.625		-0.578779	17.75	81.125		-0.645317	19.625	72.5		-0.568406	20.75	75
6.83348	22.8532		0.134752	9.47836	23.6145		0.118296	5.8493	12.9587		0.121287	5.80025	9.80889		0.0691243	5.28982	15.7066		0.102694	4.65219	12.8945		0.109394	4.51782	10.6024		0.0948288	4.62717	11.3263		0.104301	9.39605	27.4799		0.179325	4.13824	26.1858		0.133563	7.45941	18.6505		0.0893419	5.52753	12.3982		0.127794	6.81909	32.9978
8	8		8	8	8		8	8	8		8	8	8		8	8	8		8	8	8		8	8	8		8	8	8		8	8	8		8	8	8		8	8	8		8	8	8		8	8	8
2.416	8.07982		0.0476422	3.35111	8.34897		0.0418239	2.06804	4.5816		0.0428815	2.0507	3.46797		0.0244391	1.87023	5.55311		0.0363077	1.6448	4.55889		0.0386766	1.59729	3.74851		0.033527	1.63595	4.00446		0.0368761	3.322	9.7156		0.063401	1.46309	9.25808		0.0472215	2.6373	6.59393		0.0315871	1.95428	4.38341		0.045182	2.41091	11.6665
Figure S4L
IR41a-Gal4;IR76b1/+				IR76b-Gal4;IR76b1/+				GR66a-Gal4;IR76b1/+				UAS-IR76b;IR76b1/+				IR76b-/-				IR41a > IR76b; IR76b1/1				IR76b > IR76b; IR76b1/1				GR66a > IR76b; IR76b1/1
Put	H20	total	P.I	Put	H20	total	P.I	Put	H20	total	P.I	Put	H20	total	P.I	Put	H20	total	P.I	Put	H20	total	P.I	Put	H20	total	P.I	Put	H20	total	P.I
37	4	41	0.804878	42	6	48	0.75	50	6	56	0.785714	37	9	46	0.608696	33	12	45	0.466667	33	0	33	1	45	8	53	0.698113	23	7	30	0.533333
39	7	46	0.695652	37	4	41	0.804878	47	9	56	0.678571	43	6	49	0.755102	41	18	59	0.389831	32	0	32	1	36	3	39	0.846154	30	5	35	0.714286
43	11	54	0.592593	51	7	58	0.758621	44	5	49	0.795918	42	9	51	0.647059	32	16	48	0.333333	47	10	57	0.649123	47	14	61	0.540984	27	29	56	-0.0357143
45	9	54	0.666667	45	6	51	0.764706	37	4	41	0.804878	51	8	59	0.728814	40	19	59	0.355932	32	3	35	0.828571	43	12	55	0.563636	18	20	38	-0.0526316
50	10	60	0.666667	45	6	51	0.764706	39	14	53	0.471698	53	9	62	0.709677	30	14	44	0.363636	29	6	35	0.657143	42	9	51	0.647059	22	14	36	0.222222
42	12	54	0.555556	43	7	50	0.72	51	10	61	0.672131	50	7	57	0.754386	29	11	40	0.45	36	2	38	0.894737	47	11	58	0.62069	35	26	61	0.147541
51	6	57	0.789474	50	9	59	0.694915	44	7	51	0.72549	43	12	55	0.563636	32	27	59	0.0847458	53	12	65	0.630769	43	10	53	0.622642	29	27	56	0.0357143
39	14	53	0.471698	45	16	61	0.47541	45	3	48	0.875	45	9	54	0.666667	26	20	46	0.130435	49	15	64	0.53125	47	7	54	0.740741	23	16	39	0.179487
43.25	9.125	52.375	0.655398	44.75	7.625	52.375	0.716654	44.625	7.25	51.875	0.726175	45.5	8.625	54.125	0.679255	32.875	17.125	50	0.321822	38.875	6	44.875	0.773949	43.75	9.25	53	0.660002	25.875	18	43.875	0.21803
5.14782	3.31393	6.06954	0.113297	4.43203	3.66206	6.6319	0.102788	4.8679	3.61544	6.10474	0.123461	5.39841	1.76777	5.3033	0.0700208	5.19443	5.13914	7.78276	0.140364	9.28036	5.73212	14.476	0.180634	3.7321	3.37004	6.48074	0.0994156	5.40998	9.10259	11.8254	0.27335
8	8	8	8	8	8	8	8	8	8	8	8	8	8	8	8	8	8	8	8	8	8	8	8	8	8	8	8	8	8	8	8
1.82003	1.17165	2.14591	0.0400566	1.56696	1.29474	2.34473	0.0363409	1.72106	1.27825	2.15835	0.04365	1.90863	0.625	1.875	0.0247561	1.83651	1.81696	2.75162	0.049626	3.2811	2.02661	5.11803	0.0638637	1.3195	1.19149	2.29129	0.0351487	1.91272	3.21825	4.1809	0.0966437
[truncated: 78 more columns]

## Sheet: figure S6 Data
PANEL A
Stimulation:NaCl
Genotype: IR76b-Gal4; UAS-GCaMP6f
state: mated female
ROI1		peak max (0mM)	peak max (50mM)			ROI2		peak max (0mM)	peak max (50mM)
	fly-1	16.61	23.04				fly-1	11.57	14.36
	fly-2	25.57	32.69				fly-2	6.31	9.96
	fly-3	18.57	50.6				fly-3	7.59	12.26
	fly-4	21.98	45.85				fly-4	8.82	11.91
	fly-5	20.62	42.51				fly-5	12.21	7.48
	fly-6	33.64	20.76				fly-6	11.03	13.77
	AVG	22.8317	35.9083				AVG	9.58833	11.6233
	STD	6.11239	12.3587				STD	2.37528	2.55025
	N	6	6				N	6	6
	SEM	2.49537	5.04542				SEM	0.969702	1.04114
PANEL C-D
Stimulation: putrescine on forelegs
Genotype: IR76b-Gal4; UAS-GCaMP6f
state: mated female
		peak max (0mM)	peak max (1mM)	peak max (10mM)	peak max (100mM)
	cell1	5.7	14.06	39.87	96.73
	cell2	12.73	0.53	7.55	45.57
	cell3	-2.21	-0.88	13.31	41.31
	cell4	2.45	6.58	2.48	40.44
	cell5	4.83	10.43	9.61	65.25
	cell6	4.49	4.19	29.64	12.76
	cell7	9.07	6.82	6.01	20.85
	cell8	0.45	5.43	13.38	17.17
	AVG	4.68875	5.895	15.2312	42.51
	STD	4.71337	4.87509	12.8731	27.9498
	N	8	8	8	8
	SEM	1.66643	1.7236	4.55134	9.88175
PANEL E
Stimulation:50mM NaCl
Genotype: IR76b-Gal4,GCaMP6f; IR76b1
state: mated female
ROI1		peak max (50mM)				ROI2		peak max (50mM)
	fly-1	27.32					fly-1	7.92
	fly-2	12.37					fly-2	8.34
	fly-3	9.02					fly-3	7.02
	fly-4	6.98					fly-4	4.35
	fly-5						fly-5
	fly-6						fly-6
	AVG	13.9225					AVG	6.9075
	STD	9.20391					STD	1.79171
	N	6					N	6
	SEM	3.75748					SEM	0.731463
Genotype: IR76bGal4,GCaMP5; IR76b1/+
state: mated female
ROI1		peak max (50mM)				ROI2		peak max (50mM)
	fly-1	23.04					fly-1	14.36
	fly-2	32.69					fly-2	9.96
	fly-3	50.6					fly-3	12.26
	fly-4	45.85					fly-4	11.91
	fly-5	42.51					fly-5	7.48
	fly-6	20.76					fly-6	13.77
	AVG	35.9083					AVG	11.6233
	STD	12.3587					STD	2.55025
	N	6					N	6
	SEM	5.04542					SEM	1.04114

[truncated: 1 more sheets: Figure S7 Data]
